# Supplementary material for: Exercise, or exercise and diet for the management of polycystic ovary syndrome: a systematic review and meta-analysis
Source: Springer Nature journal article supplement (doi:10.1186/s13643-019-0962-3), 2019-02-12

## Supplementary Meta-Analyses – Exercise versus Control

**Supporting Figure: Change from baseline systolic blood pressure (mmHg); exercise versus control**

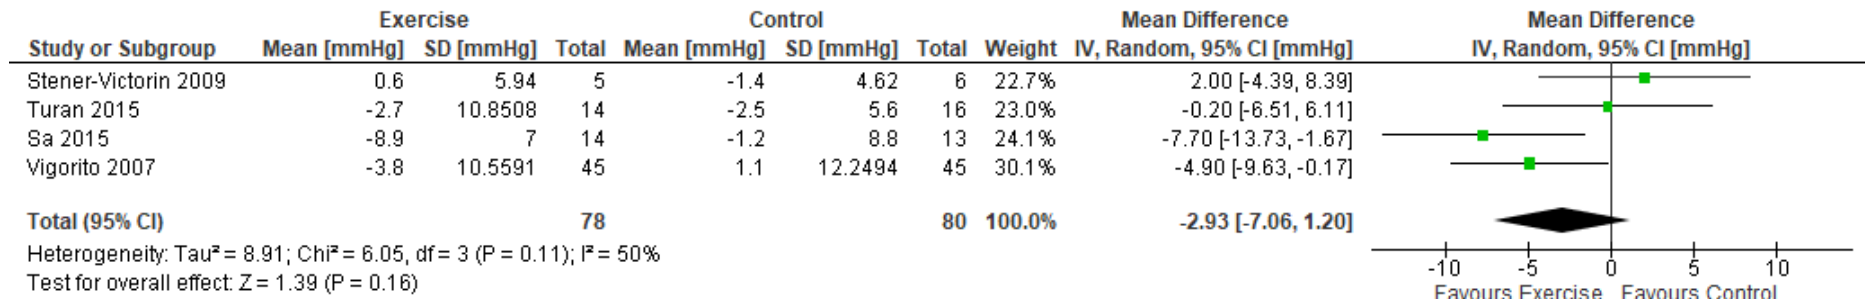

**Supporting Figure: Post-intervention systolic blood pressure (mmHg); exercise versus control**

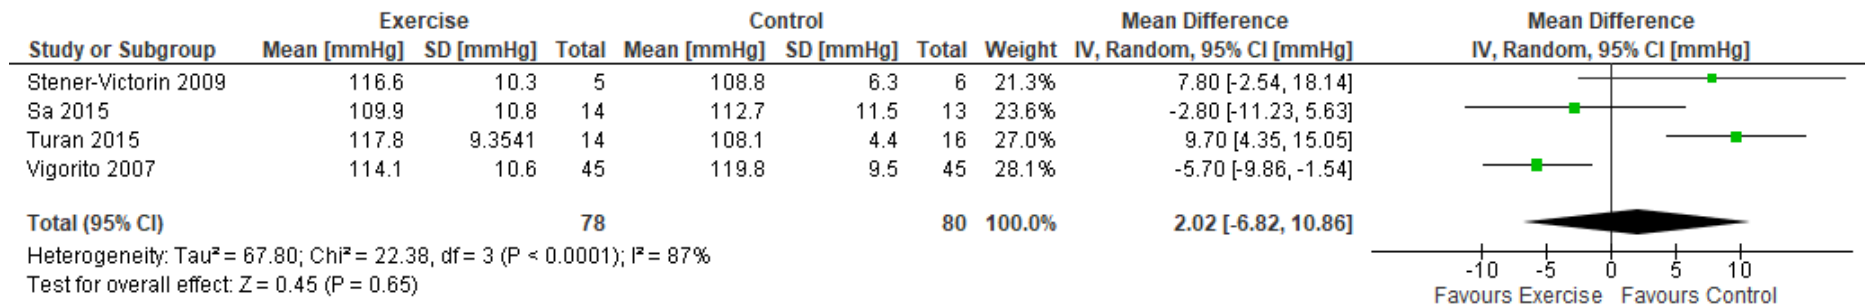

### Supporting Figure: Change from baseline diastolic blood pressure (mmHg); exercise versus control

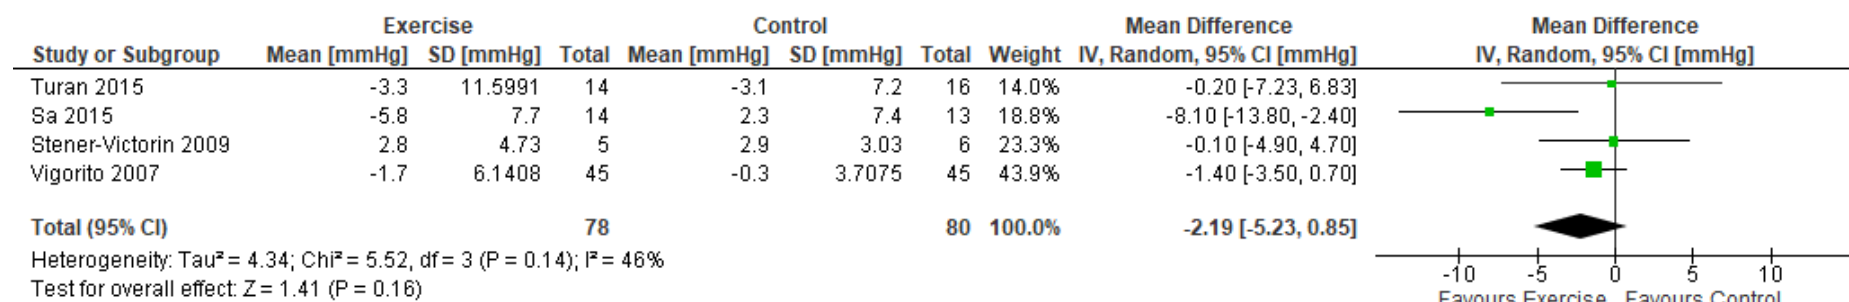

### Supporting Figure: Post-intervention diastolic blood pressure (mmHg); exercise versus control

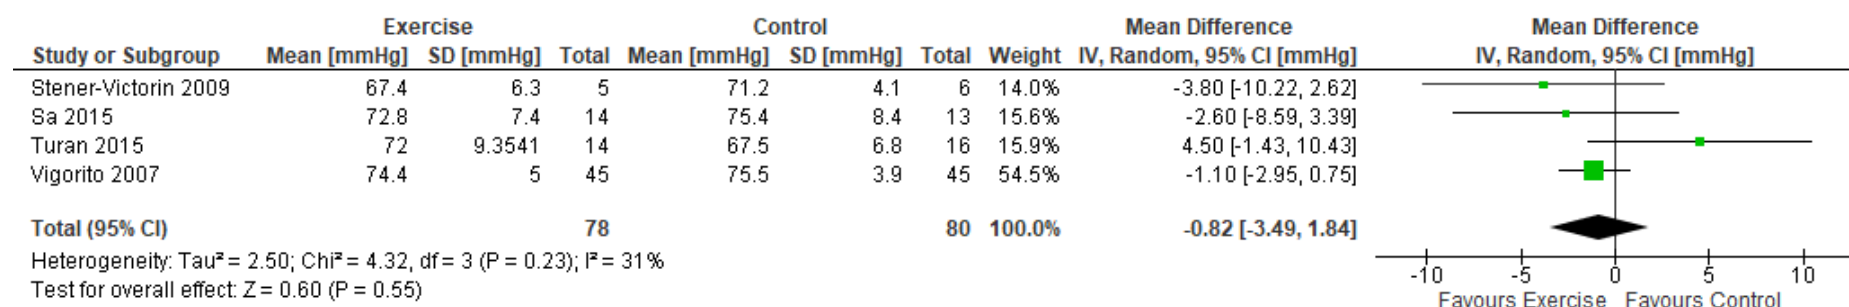

### Supporting Figure: Change from baseline fasting blood glucose (mg/dL); exercise versus control

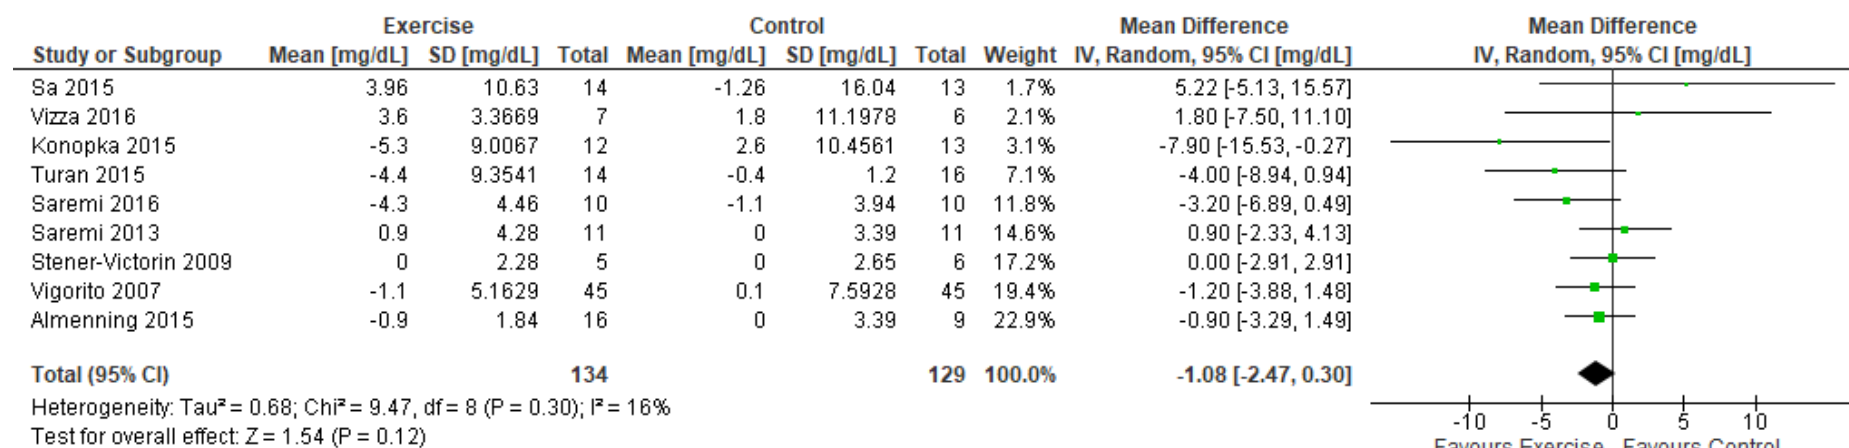

### Supporting Figure: Post-intervention fasting blood glucose (mg/dL); exercise versus control

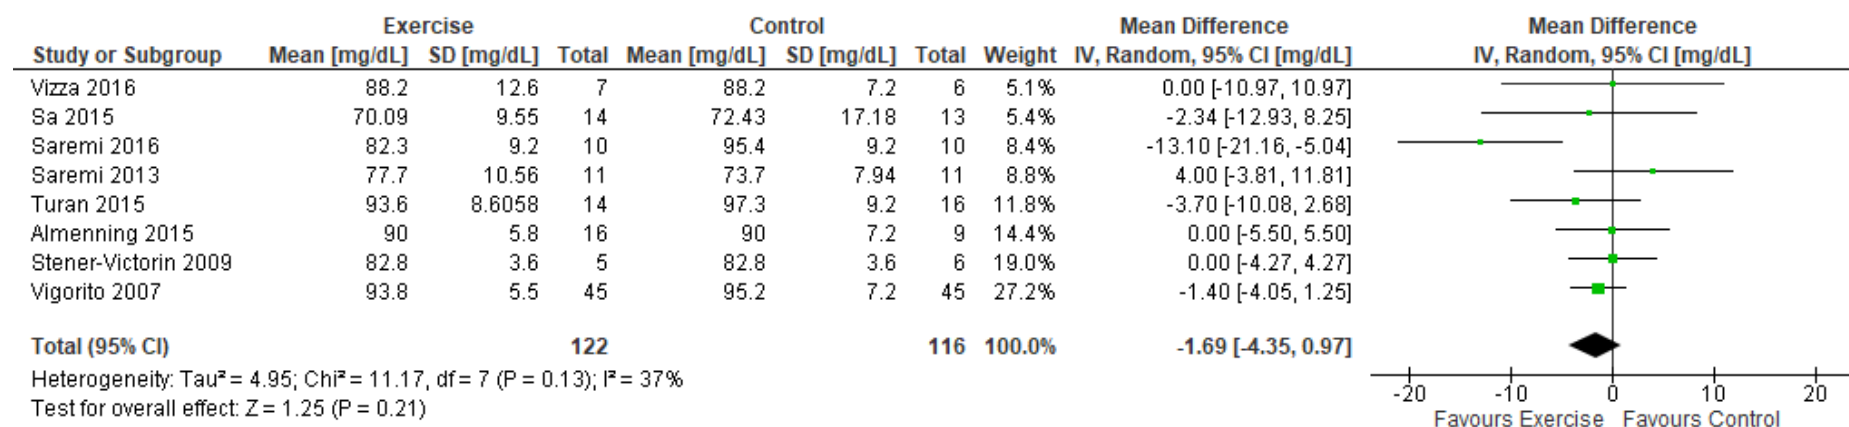

### Supporting Figure: Change from baseline high-density lipoprotein cholesterol (mg/dL); exercise versus control

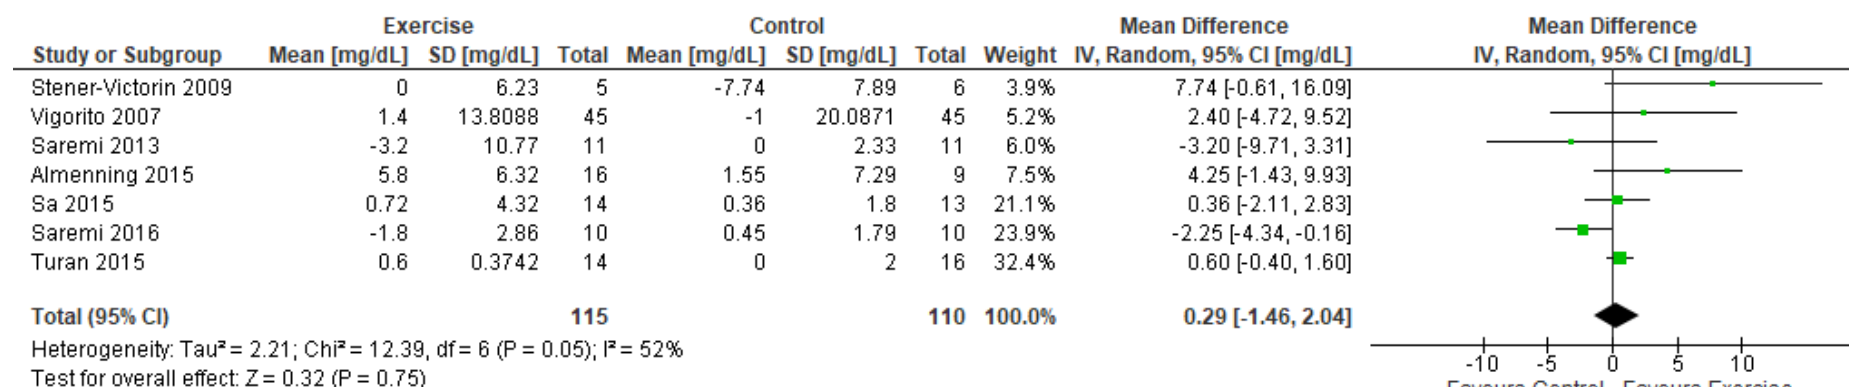

### Supporting Figure: Post-intervention high-density lipoprotein cholesterol (mg/dL); exercise versus control

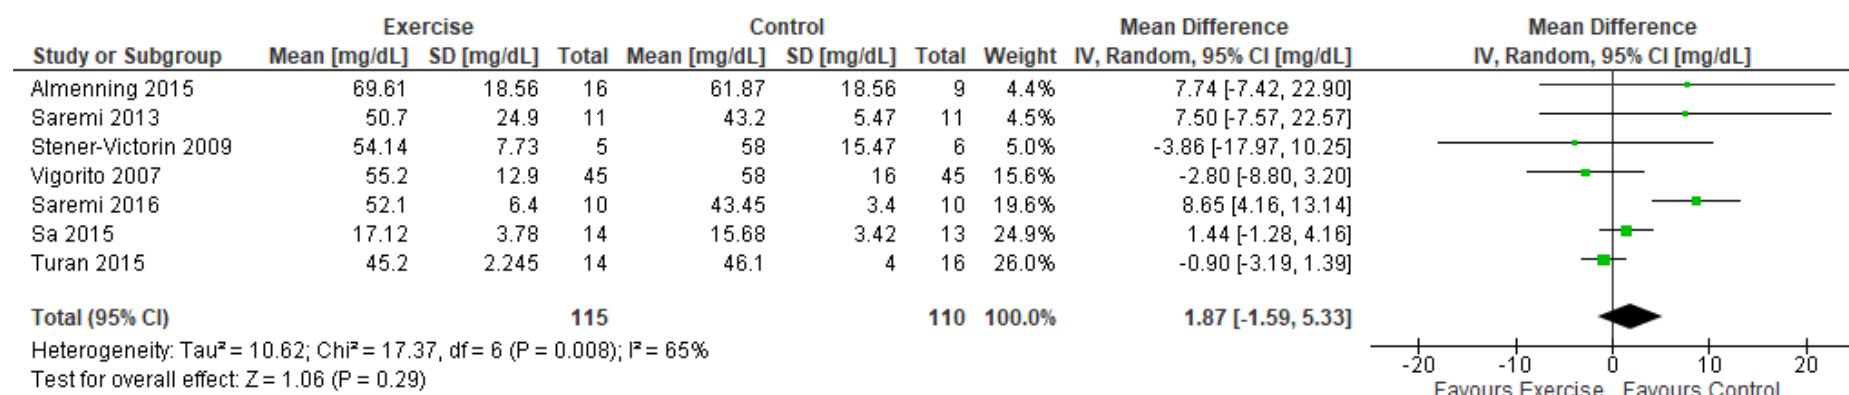

**Supporting Figure: Change from baseline resting heart rate (beats/min); exercise versus control**

| Study or Subgroup     | Exercise   |          |           | Control    |          |           | Weight        | Mean Difference<br>IV, Random, 95% CI [BPM] |
|-----------------------|------------|----------|-----------|------------|----------|-----------|---------------|---------------------------------------------|
|                       | Mean [BPM] | SD [BPM] | Total     | Mean [BPM] | SD [BPM] | Total     |               |                                             |
| Stener-Victorin 2009  | -4.2       | 5.69     | 5         | 0.3        | 8.49     | 6         | 9.7%          | -4.50 [-12.93, 3.93]                        |
| Turan 2015            | -3.62      | 10.1025  | 14        | 3.5        | 6.8      | 16        | 15.4%         | -7.12 [-13.37, -0.87]                       |
| Almenning 2015        | -0.75      | 3.22     | 16        | -0.9       | 3.2524   | 9         | 37.2%         | 0.15 [-2.50, 2.80]                          |
| Vigorito 2007         | -2.2       | 6.5803   | 45        | 0.9        | 5.8782   | 45        | 37.8%         | -3.10 [-5.68, -0.52]                        |
| <b>Total (95% CI)</b> |            |          | <b>80</b> |            |          | <b>76</b> | <b>100.0%</b> | <b>-2.65 [-5.55, 0.25]</b>                  |

Heterogeneity: Tau<sup>2</sup> = 4.07; Chi<sup>2</sup> = 6.14, df = 3 (P = 0.10); I<sup>2</sup> = 51 %  
 Test for overall effect: Z = 1.79 (P = 0.07)

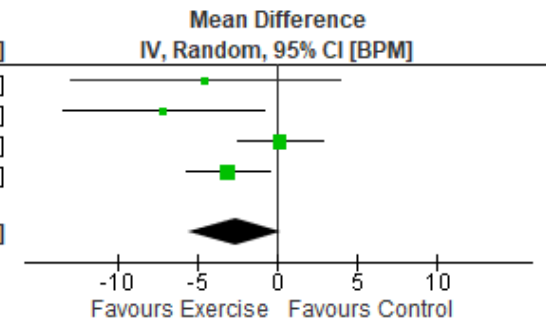

**Supporting Figure: Post-intervention resting heart rate (beats/min); exercise versus control**

| Study or Subgroup     | Exercise   |          |           | Control    |          |           | Weight        | Mean Difference<br>IV, Random, 95% CI [BPM] |
|-----------------------|------------|----------|-----------|------------|----------|-----------|---------------|---------------------------------------------|
|                       | Mean [BPM] | SD [BPM] | Total     | Mean [BPM] | SD [BPM] | Total     |               |                                             |
| Stener-Victorin 2009  | 63.6       | 9.1      | 5         | 69.3       | 15.9     | 6         | 1.2%          | -5.70 [-20.72, 9.32]                        |
| Turan 2015            | 81.2       | 8.2316   | 14        | 88.1       | 11.2     | 16        | 5.7%          | -6.90 [-13.88, 0.08]                        |
| Almenning 2015        | 58.7       | 9.09     | 16        | 58.4       | 6.2      | 9         | 7.7%          | 0.30 [-5.72, 6.32]                          |
| Vigorito 2007         | 74.8       | 4.8      | 45        | 78.1       | 3.9      | 45        | 85.4%         | -3.30 [-5.11, -1.49]                        |
| <b>Total (95% CI)</b> |            |          | <b>80</b> |            |          | <b>76</b> | <b>100.0%</b> | <b>-3.26 [-4.93, -1.59]</b>                 |

Heterogeneity: Tau<sup>2</sup> = 0.00; Chi<sup>2</sup> = 2.49, df = 3 (P = 0.48); I<sup>2</sup> = 0 %  
 Test for overall effect: Z = 3.83 (P = 0.0001)

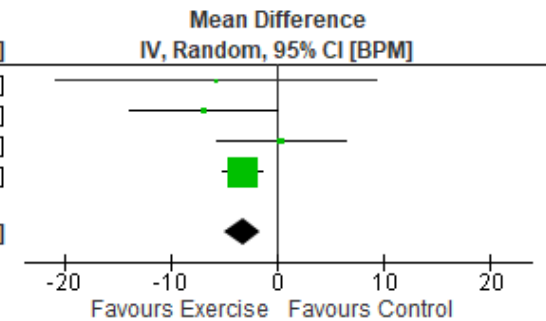

### Supporting Figure: Change from baseline body mass index (kg/m<sup>2</sup>); exercise versus control

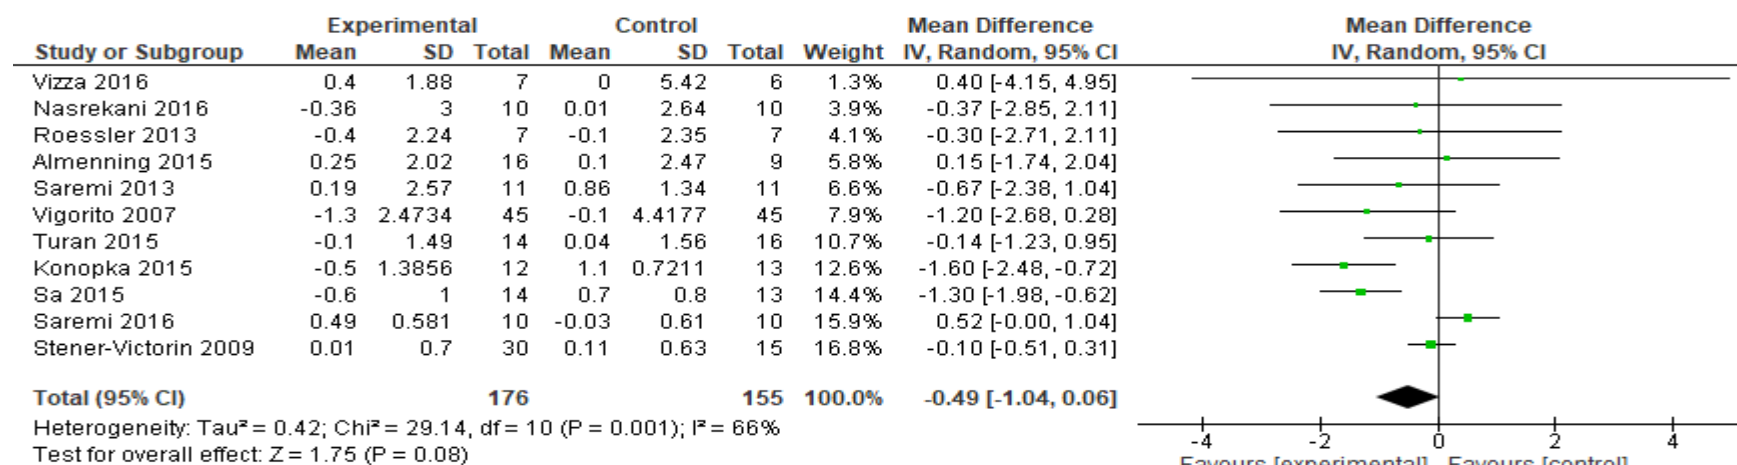

### Supporting Figure: Post-intervention body mass index (kg/m<sup>2</sup>); exercise versus control

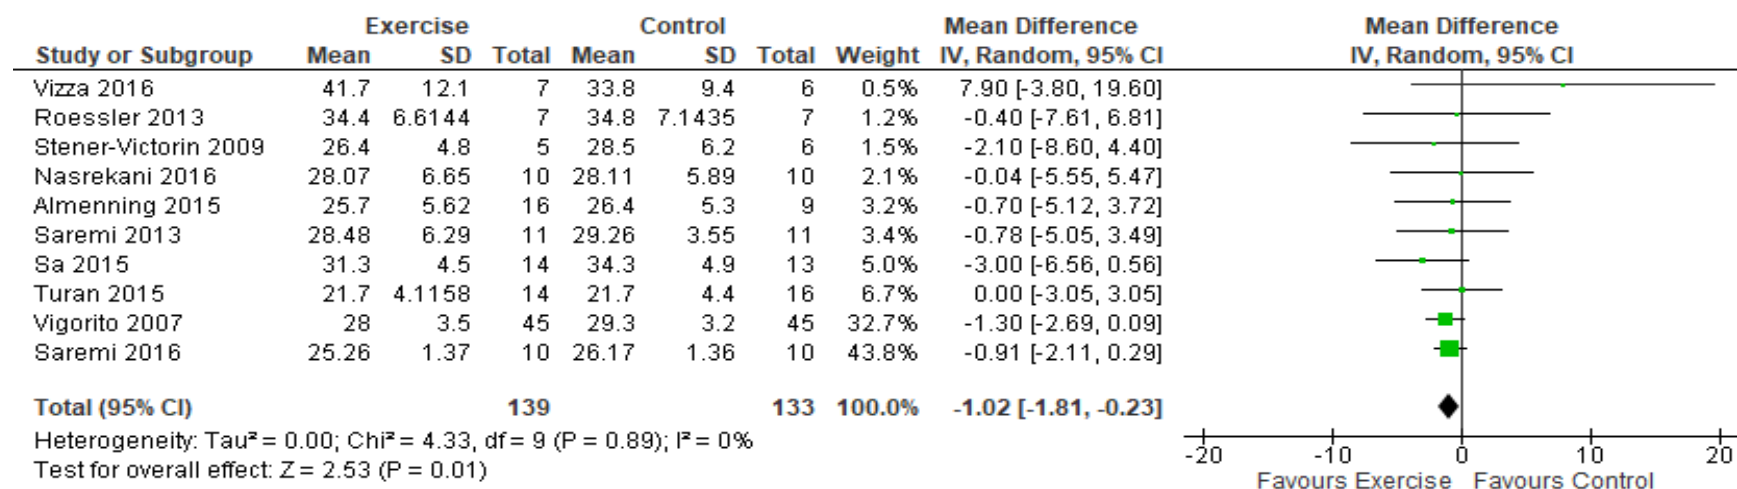

**Supporting Figure: Change from baseline body mass (kg); exercise versus control**

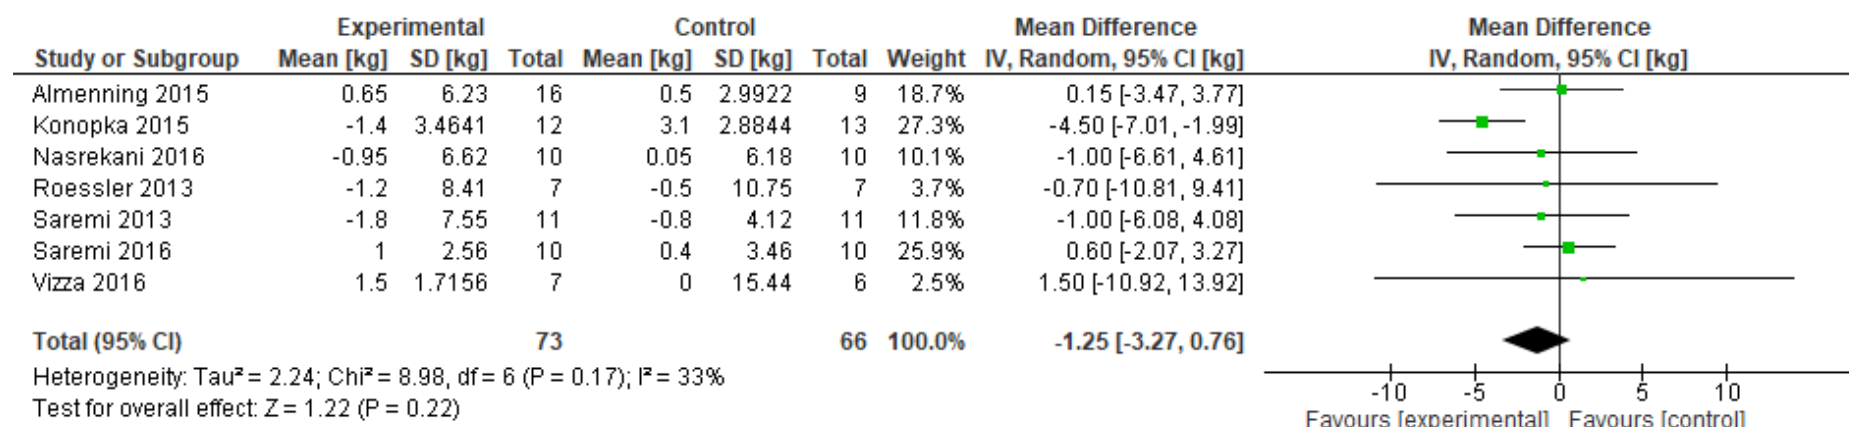

**Supporting Figure: Post-intervention body mass (kg); exercise versus control**

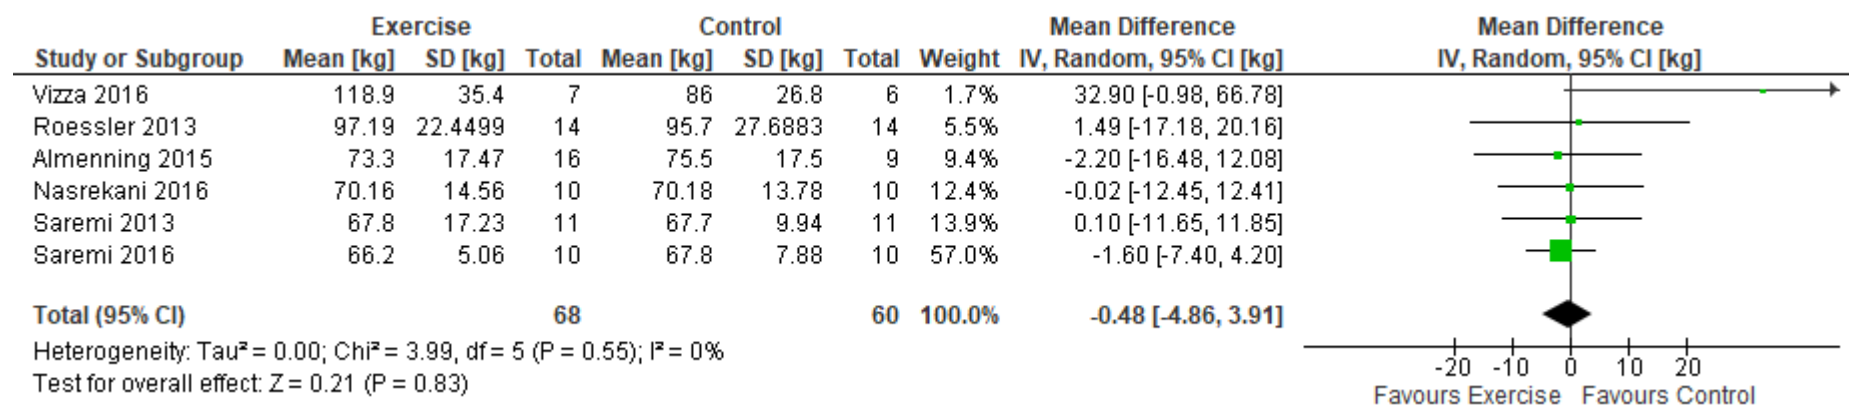

### Supporting Figure: Change from baseline waist circumference (cm); exercise versus control

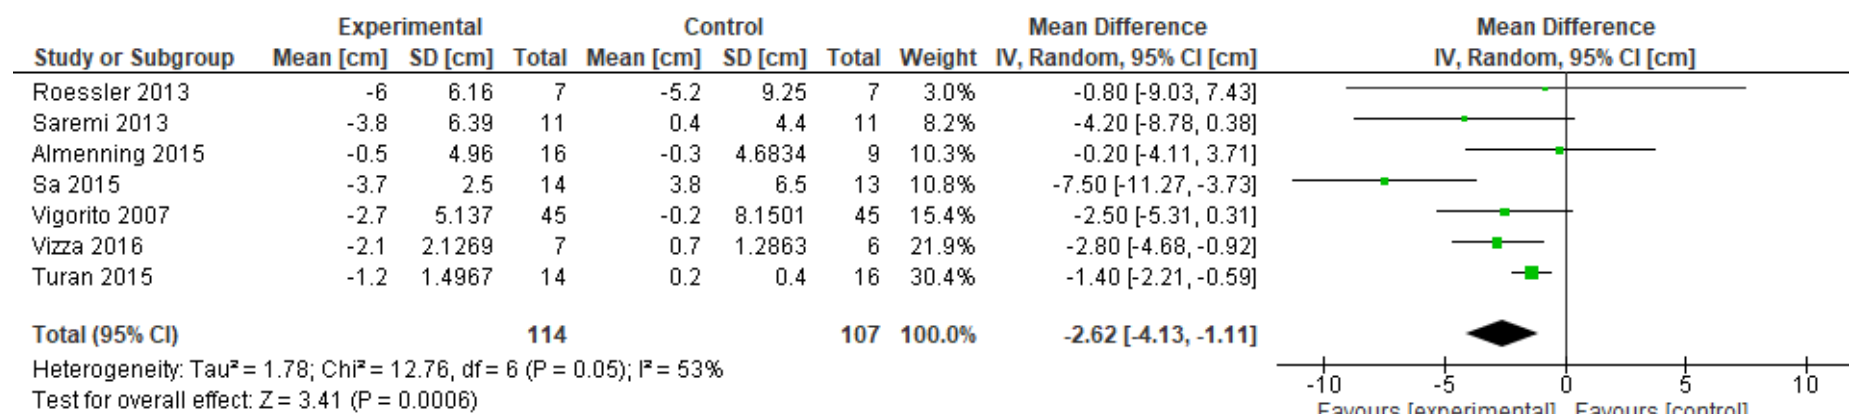

### Supporting Figure: Post-intervention waist circumference (cm); exercise versus control

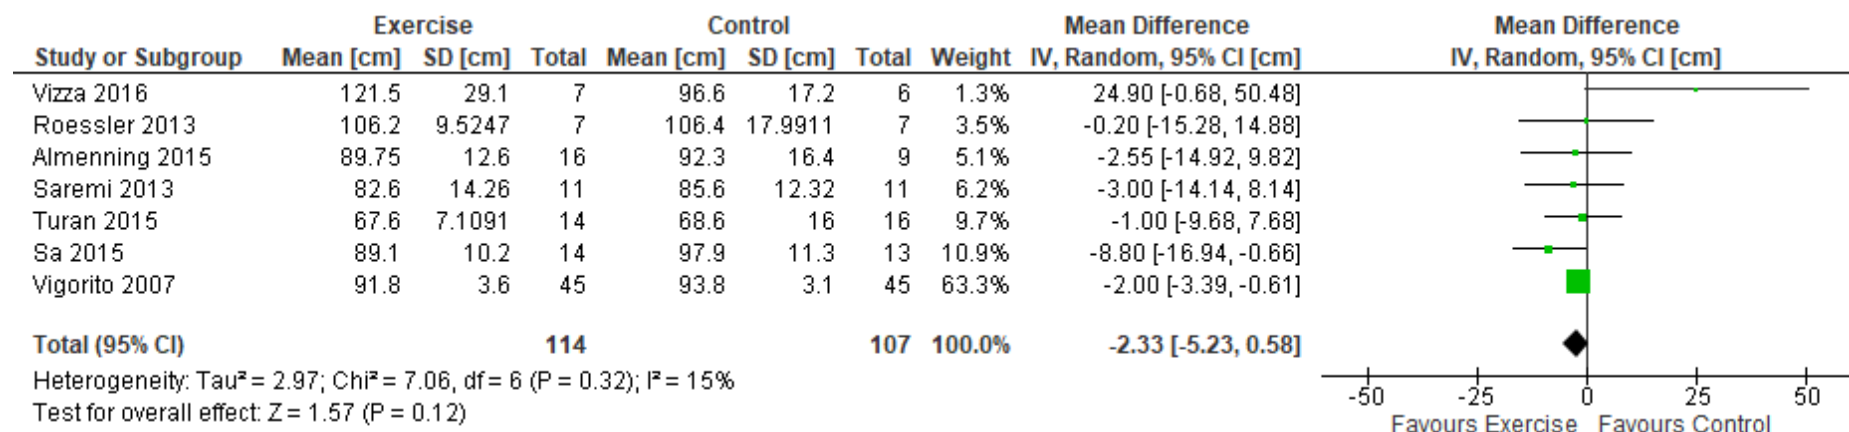



### Supporting Figure: Change from baseline waist-hip-ratio; exercise versus control

| Study or Subgroup     | Exercise |        |           | Control |        |           | Weight        | Mean Difference<br>IV, Random, 95% CI |
|-----------------------|----------|--------|-----------|---------|--------|-----------|---------------|---------------------------------------|
|                       | Mean     | SD     | Total     | Mean    | SD     | Total     |               |                                       |
| Stener-Victorin 2009  | 0        | 4.2    | 5         | 0       | 3.6    | 6         | 0.0%          | 0.00 [-4.67, 4.67]                    |
| Vigorito 2007         | -0.04    | 0.0761 | 45        | -0.01   | 0.1383 | 45        | 100.0%        | -0.03 [-0.08, 0.02]                   |
| <b>Total (95% CI)</b> |          |        | <b>50</b> |         |        | <b>51</b> | <b>100.0%</b> | <b>-0.03 [-0.08, 0.02]</b>            |

Heterogeneity: Tau<sup>2</sup> = 0.00; Chi<sup>2</sup> = 0.00, df = 1 (P = 0.99); I<sup>2</sup> = 0%  
 Test for overall effect: Z = 1.27 (P = 0.20)

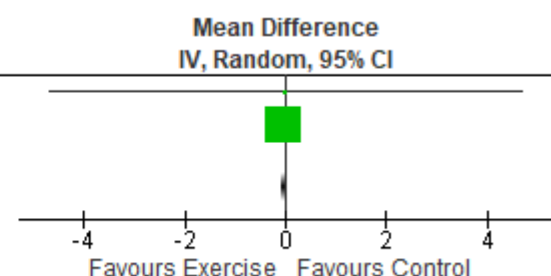

### Supporting Figure: Post-intervention waist-hip-ratio; exercise versus control

| Study or Subgroup     | Exercise |      |           | Control |      |           | Weight        | Mean Difference<br>IV, Random, 95% CI |
|-----------------------|----------|------|-----------|---------|------|-----------|---------------|---------------------------------------|
|                       | Mean     | SD   | Total     | Mean    | SD   | Total     |               |                                       |
| Stener-Victorin 2009  | 0.8      | 0.07 | 5         | 0.8     | 0.06 | 6         | 27.3%         | 0.00 [-0.08, 0.08]                    |
| Vigorito 2007         | 0.8      | 0.1  | 45        | 0.85    | 0.1  | 45        | 72.7%         | -0.05 [-0.09, -0.01]                  |
| <b>Total (95% CI)</b> |          |      | <b>50</b> |         |      | <b>51</b> | <b>100.0%</b> | <b>-0.04 [-0.08, 0.01]</b>            |

Heterogeneity: Tau<sup>2</sup> = 0.00; Chi<sup>2</sup> = 1.23, df = 1 (P = 0.27); I<sup>2</sup> = 19%  
 Test for overall effect: Z = 1.63 (P = 0.10)

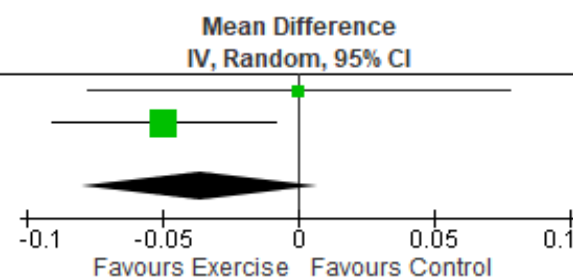

**Supporting Figure: Change from baseline body fat percentage (%); exercise versus control**

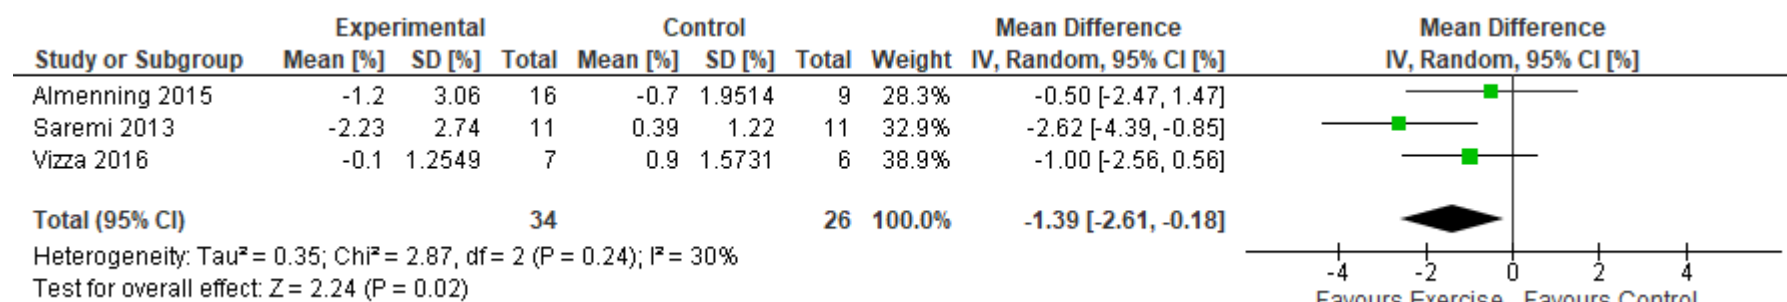

**Supporting Figure: Post-intervention body fat percentage (%); exercise versus control**

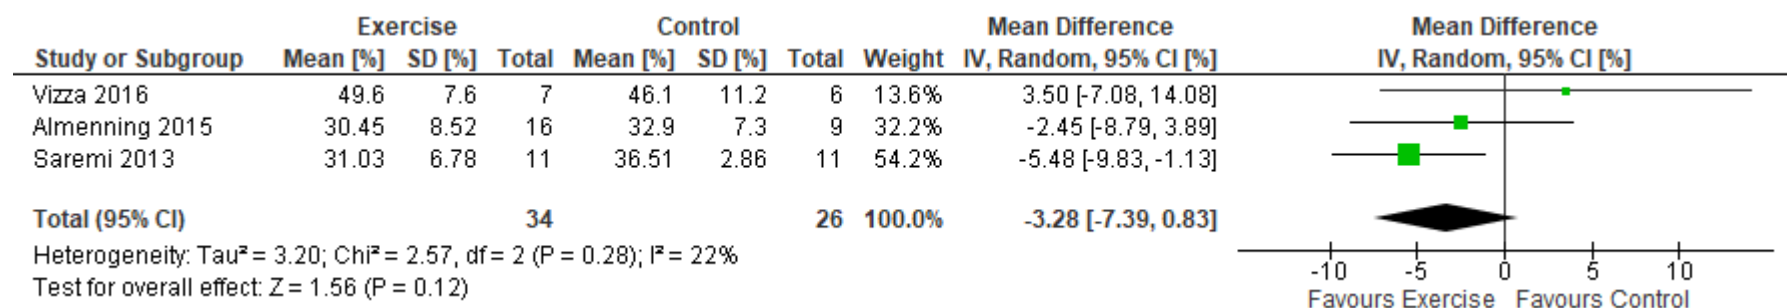

### Supporting Figure: Change from baseline fat mass (kg); exercise versus control

| Study or Subgroup     | Experimental |         |           | Control   |         |           | Weight        | Mean Difference<br>IV, Random, 95% CI [kg] |
|-----------------------|--------------|---------|-----------|-----------|---------|-----------|---------------|--------------------------------------------|
|                       | Mean [kg]    | SD [kg] | Total     | Mean [kg] | SD [kg] | Total     |               |                                            |
| Almenning 2015        | -0.8         | 4.4     | 16        | -0.3      | 2.4718  | 9         | 28.3%         | -0.50 [-3.19, 2.19]                        |
| Konopka 2015          | -1.4         | 2.4249  | 12        | 2.4       | 2.5239  | 13        | 35.3%         | -3.80 [-5.74, -1.86]                       |
| Vizza 2016            | 0.4          | 1.4749  | 7         | 1         | 1.8374  | 6         | 36.4%         | -0.60 [-2.43, 1.23]                        |
| <b>Total (95% CI)</b> |              |         | <b>35</b> |           |         | <b>28</b> | <b>100.0%</b> | <b>-1.70 [-3.93, 0.53]</b>                 |

Heterogeneity: Tau<sup>2</sup> = 2.69; Chi<sup>2</sup> = 6.62, df = 2 (P = 0.04); I<sup>2</sup> = 70%  
 Test for overall effect: Z = 1.49 (P = 0.14)

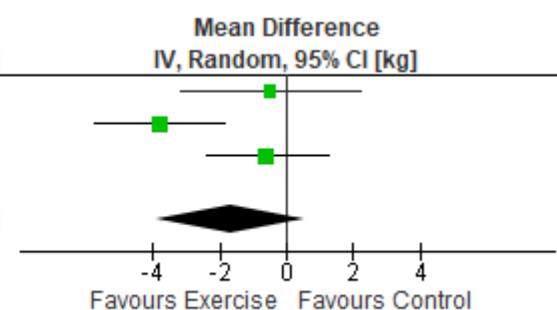

### Supporting Figure: Post-intervention fat mass (kg); exercise versus control

| Study or Subgroup     | Exercise  |         |           | Control   |         |           | Weight        | Mean Difference<br>IV, Random, 95% CI [kg] |
|-----------------------|-----------|---------|-----------|-----------|---------|-----------|---------------|--------------------------------------------|
|                       | Mean [kg] | SD [kg] | Total     | Mean [kg] | SD [kg] | Total     |               |                                            |
| Vizza 2016            | 59        | 22.7    | 7         | 40.6      | 19.2    | 6         | 36.1%         | 18.40 [-4.38, 41.18]                       |
| Almenning 2015        | 23.55     | 3.9     | 16        | 25.9      | 11.4    | 9         | 63.9%         | -2.35 [-10.04, 5.34]                       |
| <b>Total (95% CI)</b> |           |         | <b>23</b> |           |         | <b>15</b> | <b>100.0%</b> | <b>5.14 [-14.39, 24.68]</b>                |

Heterogeneity: Tau<sup>2</sup> = 140.06; Chi<sup>2</sup> = 2.86, df = 1 (P = 0.09); I<sup>2</sup> = 65%  
 Test for overall effect: Z = 0.52 (P = 0.61)

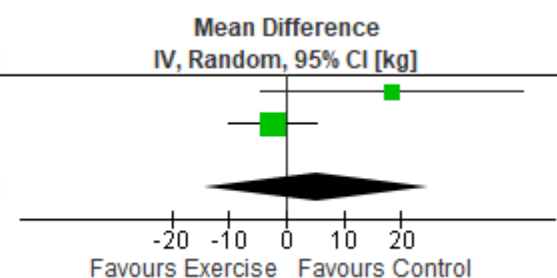

**Supporting Figure: Change from baseline fat free mass (kg); exercise versus control**

| Study or Subgroup     | Experimental |         |           | Control   |         |           | Weight        | Mean Difference<br>IV, Random, 95% CI [kg] |
|-----------------------|--------------|---------|-----------|-----------|---------|-----------|---------------|--------------------------------------------|
|                       | Mean [kg]    | SD [kg] | Total     | Mean [kg] | SD [kg] | Total     |               |                                            |
| Vizza 2016            | 1.4          | 2.112   | 7         | -0.8      | 1.5431  | 6         | 25.5%         | 2.20 [0.21, 4.19]                          |
| Konopka 2015          | 0.4          | 2.0785  | 12        | 1.1       | 2.5239  | 13        | 28.4%         | -0.70 [-2.51, 1.11]                        |
| Almenning 2015        | 0.6          | 1.35    | 16        | 0.4       | 0.9107  | 9         | 46.1%         | 0.20 [-0.69, 1.09]                         |
| <b>Total (95% CI)</b> |              |         | <b>35</b> |           |         | <b>28</b> | <b>100.0%</b> | <b>0.46 [-0.89, 1.81]</b>                  |

Heterogeneity: Tau<sup>2</sup> = 0.82; Chi<sup>2</sup> = 4.71, df = 2 (P = 0.09); I<sup>2</sup> = 58%  
 Test for overall effect: Z = 0.66 (P = 0.51)

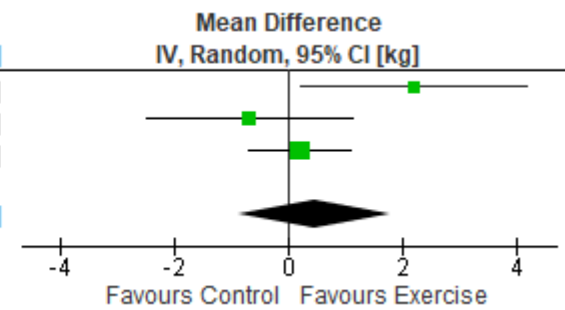

**Supporting Figure: Post-intervention fat free mass (kg); exercise versus control**

| Study or Subgroup     | Exercise  |         |           | Control   |         |           | Weight        | Mean Difference<br>IV, Random, 95% CI [kg] |
|-----------------------|-----------|---------|-----------|-----------|---------|-----------|---------------|--------------------------------------------|
|                       | Mean [kg] | SD [kg] | Total     | Mean [kg] | SD [kg] | Total     |               |                                            |
| Vizza 2016            | 58.8      | 11.9    | 7         | 46        | 10.4    | 6         | 39.2%         | 12.80 [0.68, 24.92]                        |
| Almenning 2015        | 27.35     | 3.9     | 16        | 27.4      | 3.8     | 9         | 60.8%         | -0.05 [-3.18, 3.08]                        |
| <b>Total (95% CI)</b> |           |         | <b>23</b> |           |         | <b>15</b> | <b>100.0%</b> | <b>4.99 [-7.31, 17.28]</b>                 |

Heterogeneity: Tau<sup>2</sup> = 62.16; Chi<sup>2</sup> = 4.05, df = 1 (P = 0.04); I<sup>2</sup> = 75%  
 Test for overall effect: Z = 0.79 (P = 0.43)

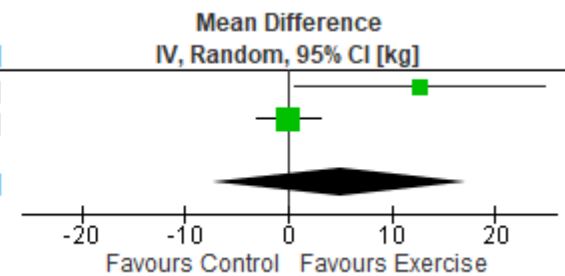

### Supporting Figure: Change from baseline total testosterone (nmol/L); exercise versus control

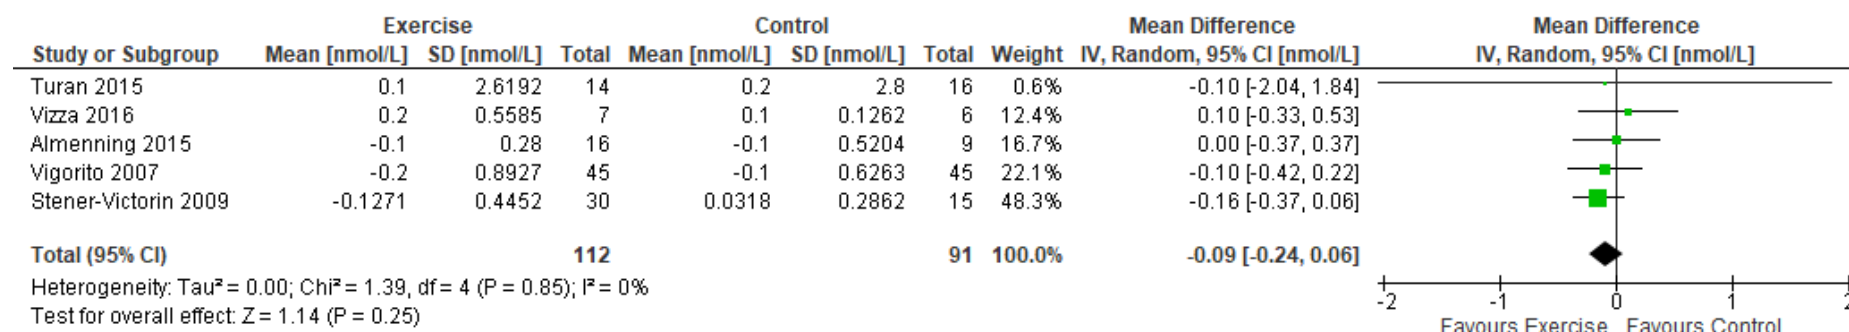

### Supporting Figure: Post-intervention total testosterone (nmol/L); exercise versus control

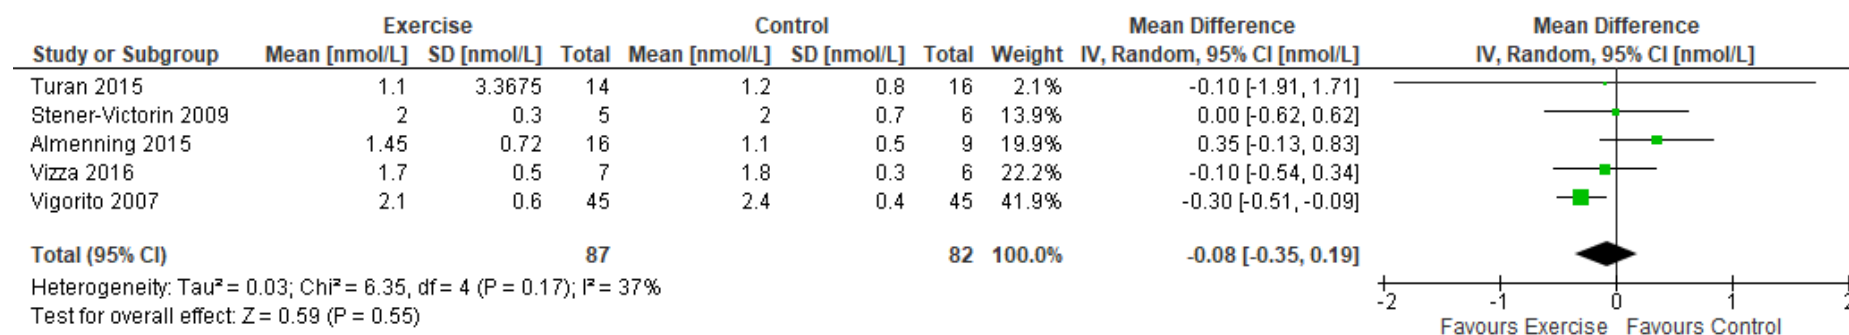

**Supporting Figure: Change from baseline sex hormone binding globulin (nmol/L); exercise versus control**

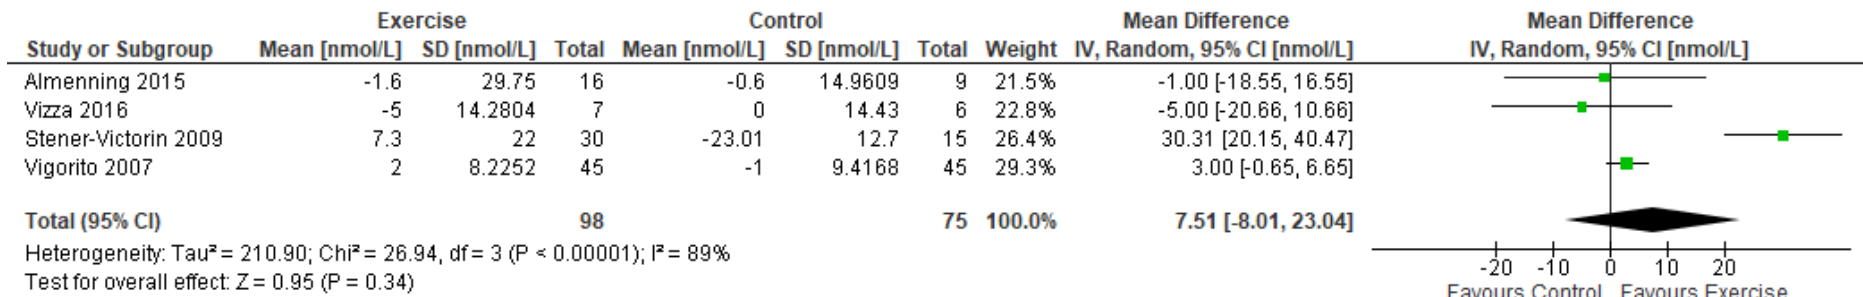

**Supporting Figure: Post-intervention sex hormone binding globulin (nmol/L); exercise versus control**

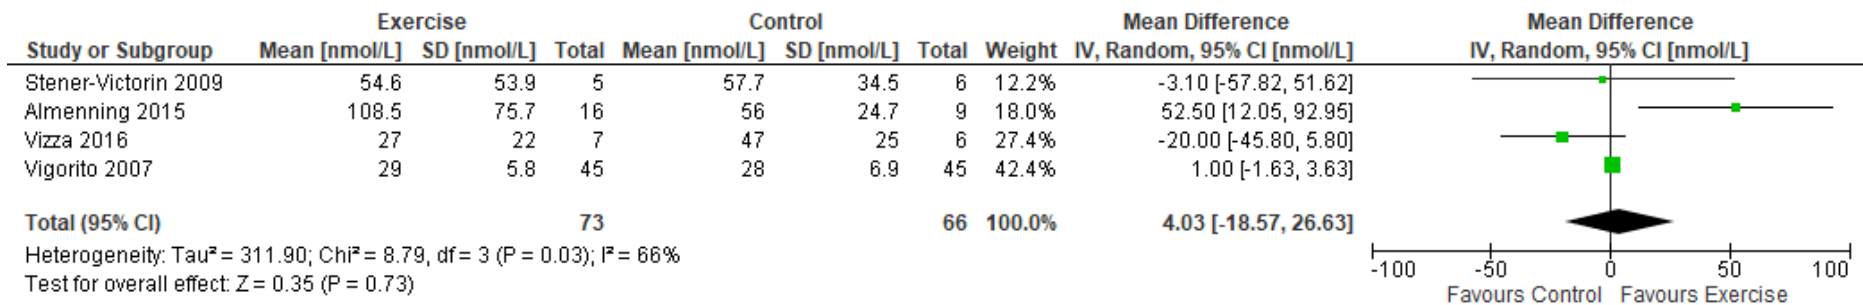

**Supporting Figure: Change from baseline free testosterone (pg/mL); exercise versus control**

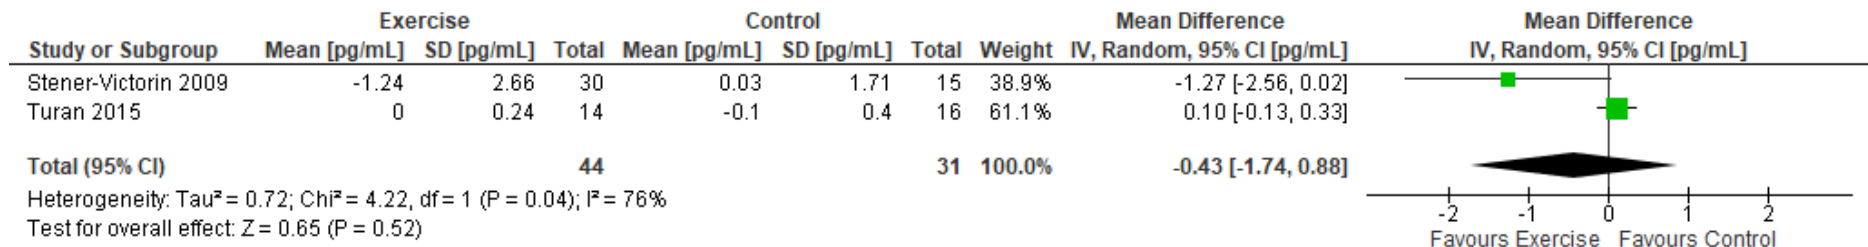

**Supporting Figure: Post-intervention free testosterone (pg/mL); exercise versus control**

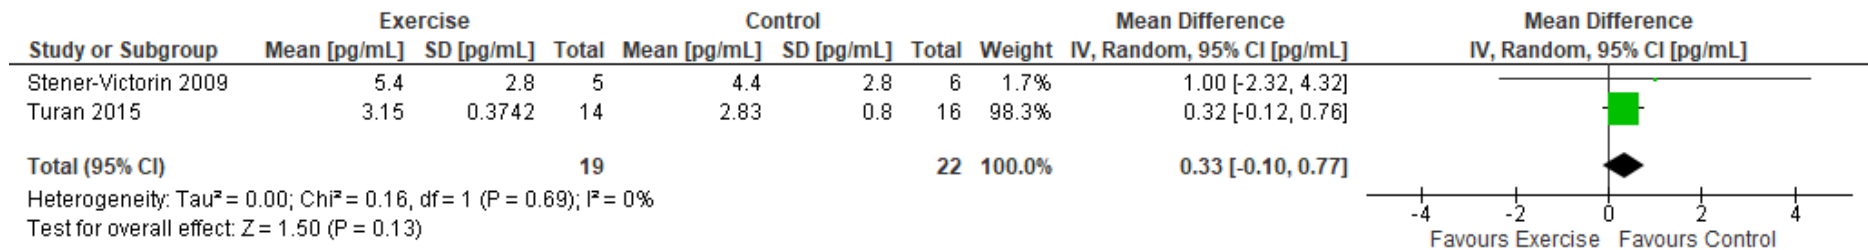

**Supporting Figure: Change from baseline free androgen index; exercise versus control**

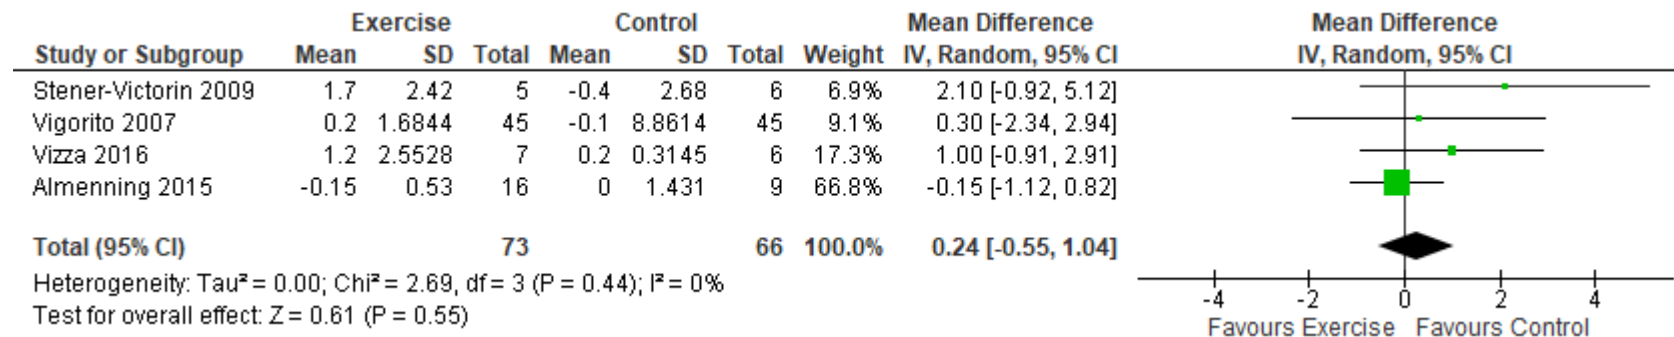

**Supporting Figure: Post-intervention free androgen index; exercise versus control**

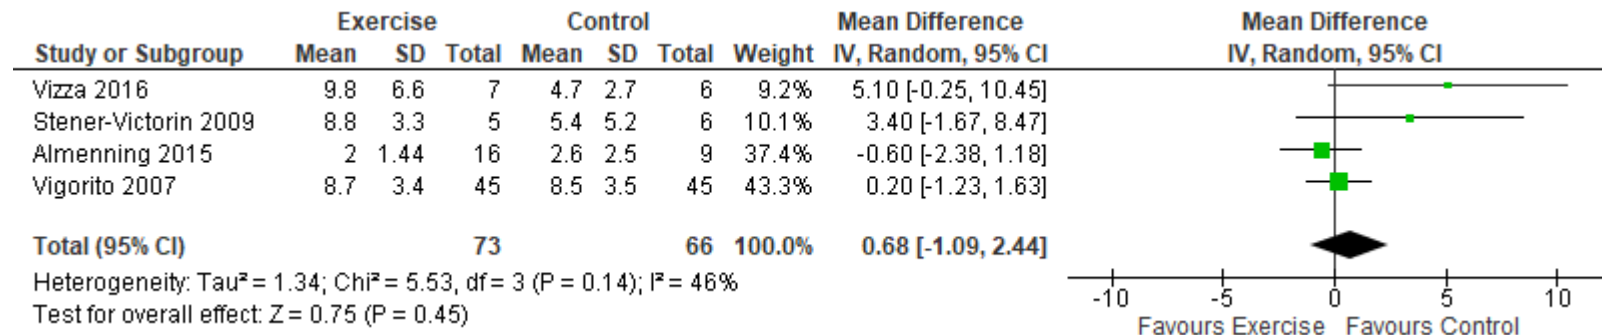



**Supporting Figure: Change from baseline Ferriman-Gallwey score; exercise versus control**

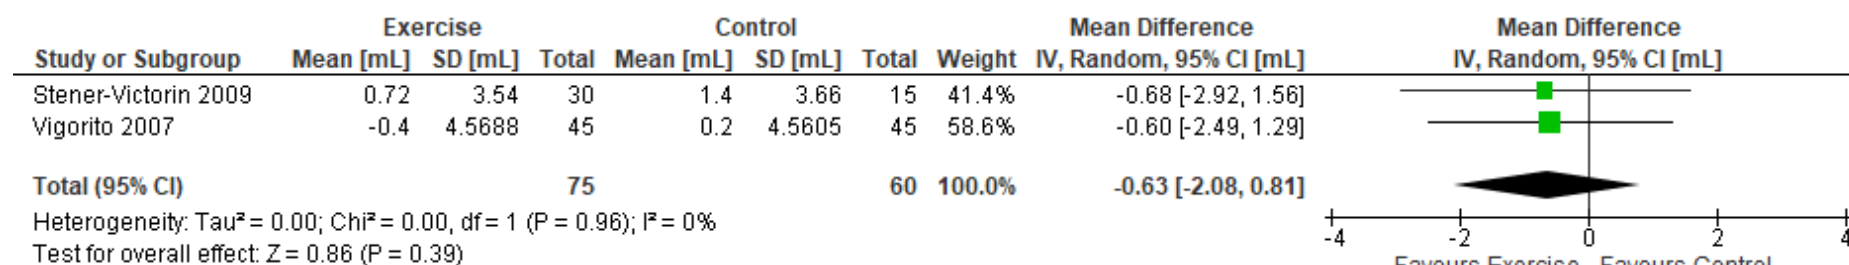

**Supporting Figure: Post-intervention Ferriman-Gallwey score; exercise versus control**

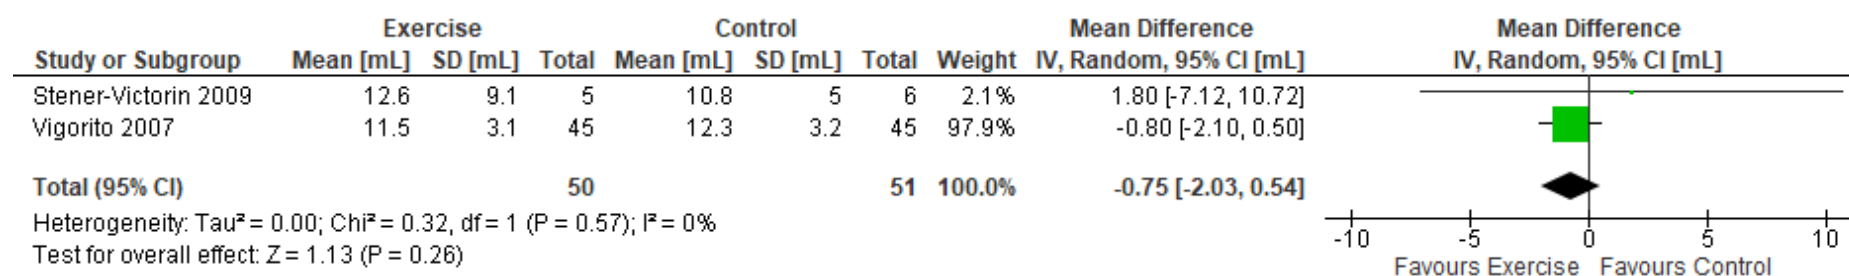

**Supporting Figure: Change from baseline oestradiol (pmol/L); exercise versus control**

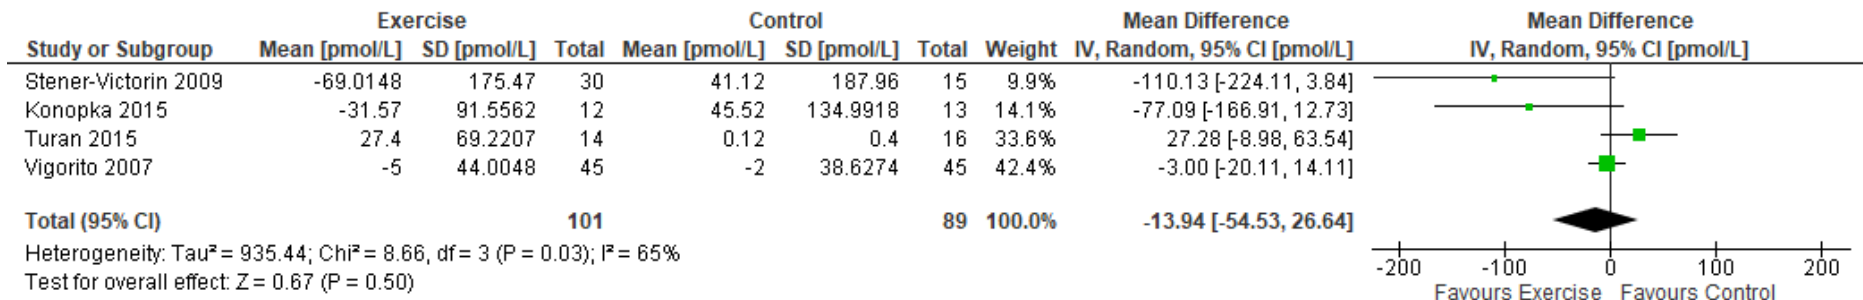

**Supporting Figure: Post-intervention oestradiol (pmol/L); exercise versus control**

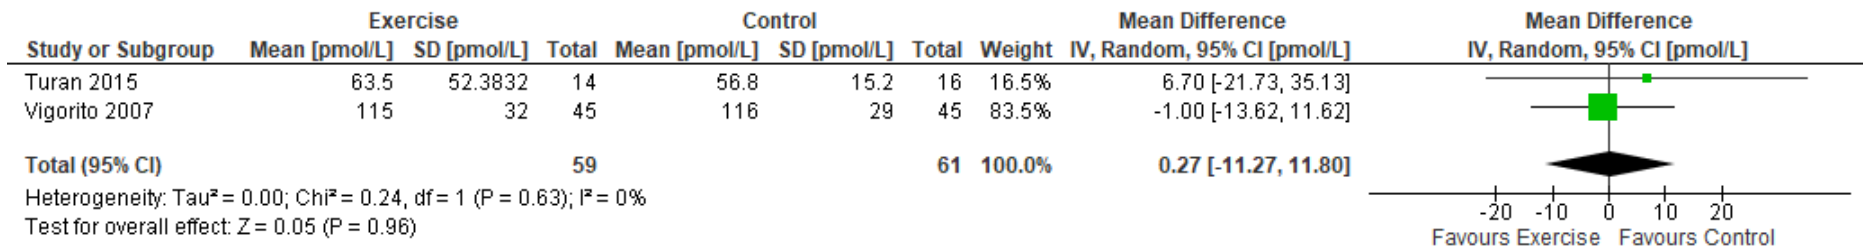

**Supporting Figure: Change from baseline dehydroepiandrosterone sulfate (µmol/L); exercise versus control**

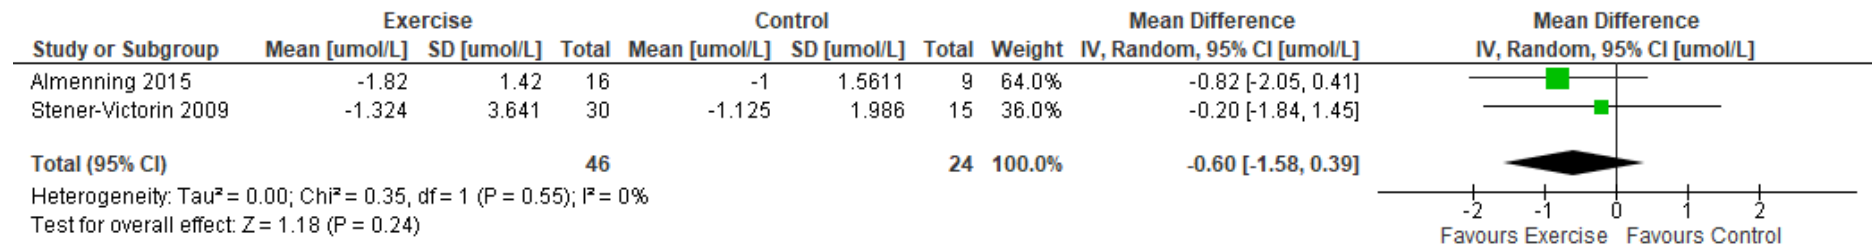

**Supporting Figure: Post-intervention dehydroepiandrosterone sulfate (µmol/L); exercise versus control**

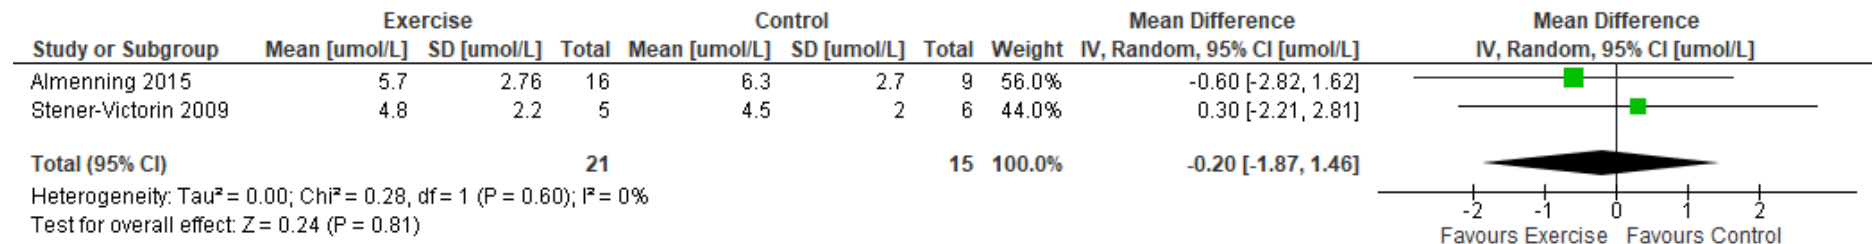

**Supporting Figure: Change from baseline luteinising hormone (IU/L); exercise versus control**

| Study or Subgroup     | Exercise    |           |           | Control     |           |           | Weight        | Mean Difference<br>IV, Random, 95% CI [IU/L] |
|-----------------------|-------------|-----------|-----------|-------------|-----------|-----------|---------------|----------------------------------------------|
|                       | Mean [IU/L] | SD [IU/L] | Total     | Mean [IU/L] | SD [IU/L] | Total     |               |                                              |
| Stener-Victorin 2009  | -0.45       | 4.33      | 30        | -1.63       | 7.98      | 15        | 15.5%         | 1.18 [-3.15, 5.51]                           |
| Nasrekani 2016        | -3.46       | 2.92      | 10        | 0           | 2.82      | 10        | 25.1%         | -3.46 [-5.98, -0.94]                         |
| Vigorito 2007         | -0.7        | 4.572     | 45        | -0.4        | 4.2389    | 45        | 29.5%         | -0.30 [-2.12, 1.52]                          |
| Turan 2015            | 1.7         | 3.3675    | 14        | 0.1         | 0.4       | 16        | 29.8%         | 1.60 [-0.17, 3.37]                           |
| <b>Total (95% CI)</b> |             |           | <b>99</b> |             |           | <b>86</b> | <b>100.0%</b> | <b>-0.30 [-2.54, 1.95]</b>                   |

Heterogeneity: Tau<sup>2</sup> = 3.57; Chi<sup>2</sup> = 10.76, df = 3 (P = 0.01); I<sup>2</sup> = 72%  
 Test for overall effect: Z = 0.26 (P = 0.80)

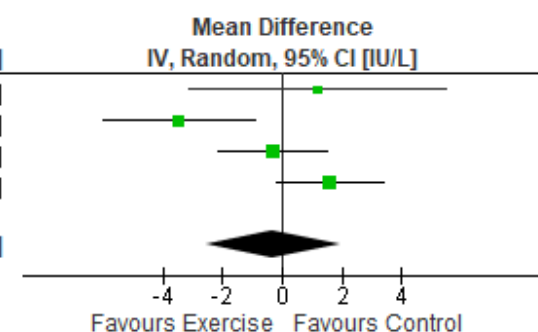

**Supporting Figure: Post-intervention luteinising hormone (IU/L); exercise versus control**

| Study or Subgroup     | Exercise    |           |           | Control     |           |           | Weight        | Mean Difference<br>IV, Random, 95% CI [IU/L] |
|-----------------------|-------------|-----------|-----------|-------------|-----------|-----------|---------------|----------------------------------------------|
|                       | Mean [IU/L] | SD [IU/L] | Total     | Mean [IU/L] | SD [IU/L] | Total     |               |                                              |
| Nasrekani 2016        | 9.33        | 6.04      | 10        | 12.86       | 6.32      | 10        | 8.7%          | -3.53 [-8.95, 1.89]                          |
| Turan 2015            | 8.8         | 5.8744    | 14        | 12.4        | 4.8       | 16        | 15.0%         | -3.60 [-7.47, 0.27]                          |
| Stener-Victorin 2009  | 5.8         | 1.5       | 5         | 5.8         | 2.2       | 6         | 30.6%         | 0.00 [-2.20, 2.20]                           |
| Vigorito 2007         | 23.5        | 3.2       | 45        | 23.1        | 2.9       | 45        | 45.7%         | 0.40 [-0.86, 1.66]                           |
| <b>Total (95% CI)</b> |             |           | <b>74</b> |             |           | <b>77</b> | <b>100.0%</b> | <b>-0.66 [-2.39, 1.06]</b>                   |

Heterogeneity: Tau<sup>2</sup> = 1.29; Chi<sup>2</sup> = 5.29, df = 3 (P = 0.15); I<sup>2</sup> = 43%  
 Test for overall effect: Z = 0.75 (P = 0.45)

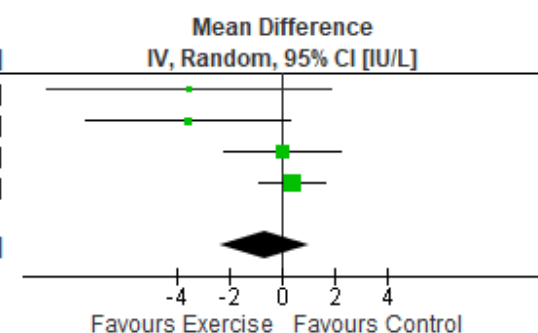

**Supporting Figure: Change from baseline follicle stimulating hormone (IU/L); exercise versus control**

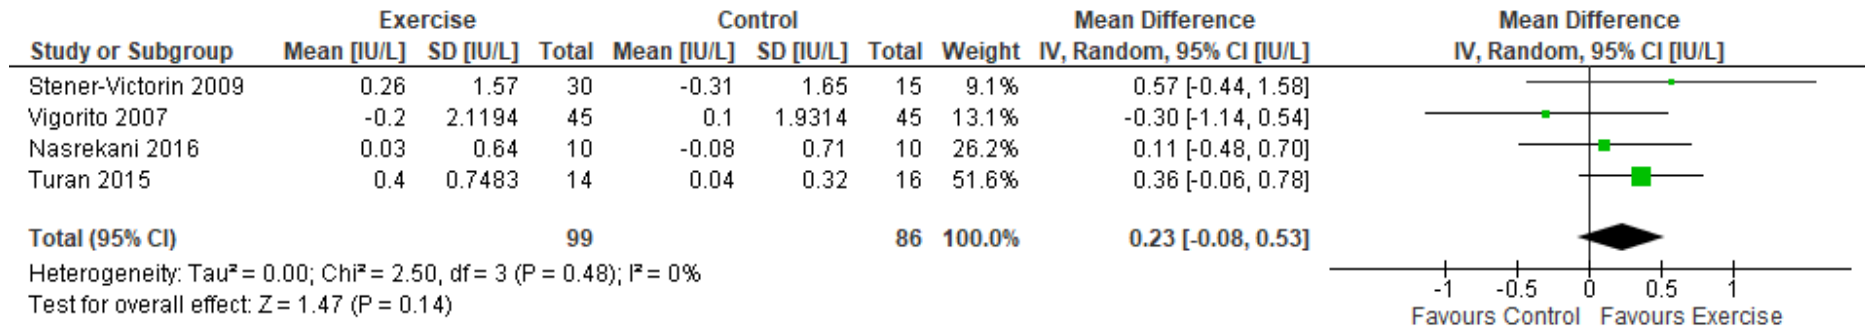

**Supporting Figure: Post-intervention follicle stimulating hormone (IU/L); exercise versus control**

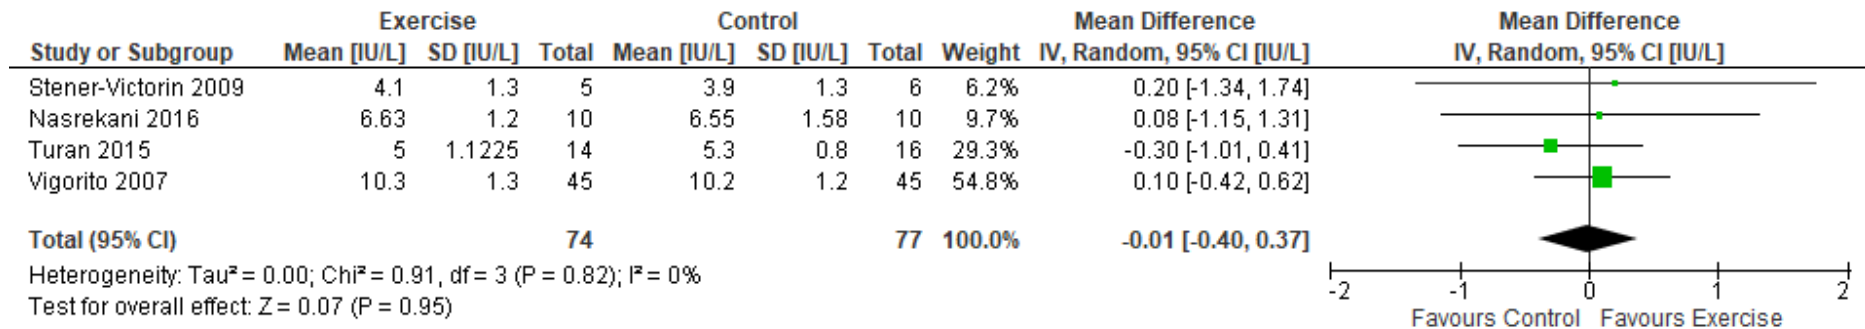

**Supporting Figure: Change from baseline luteinising hormone/follicle stimulating hormone ratio; exercise versus control**

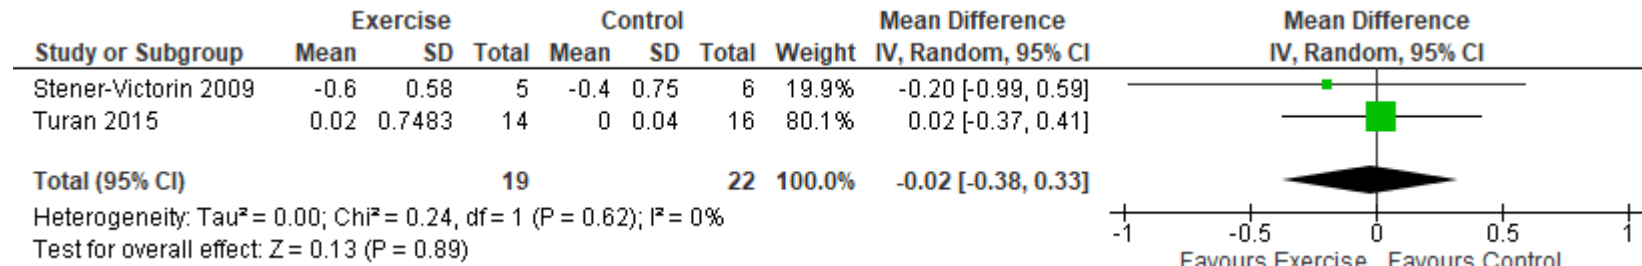

**Supporting Figure: Post-intervention luteinising hormone/follicle stimulating hormone ratio; exercise versus control**

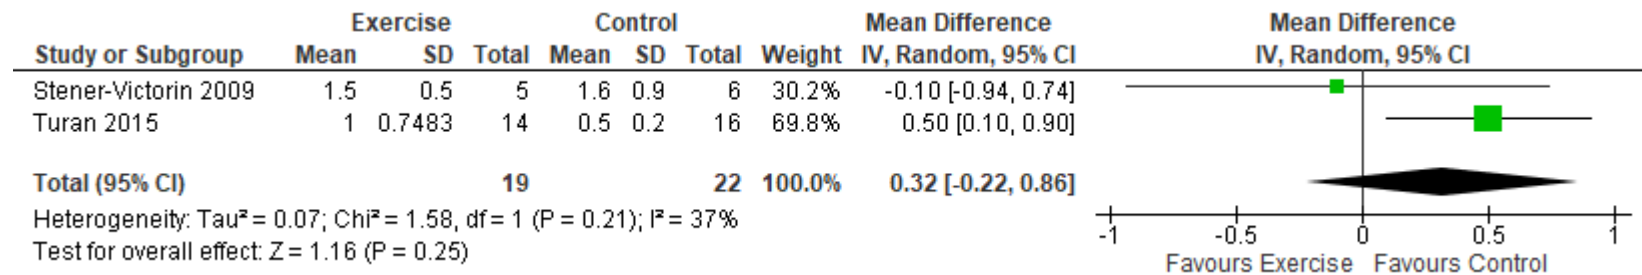

**Supporting Figure: Change from baseline progesterone (nmol/L); exercise versus control**

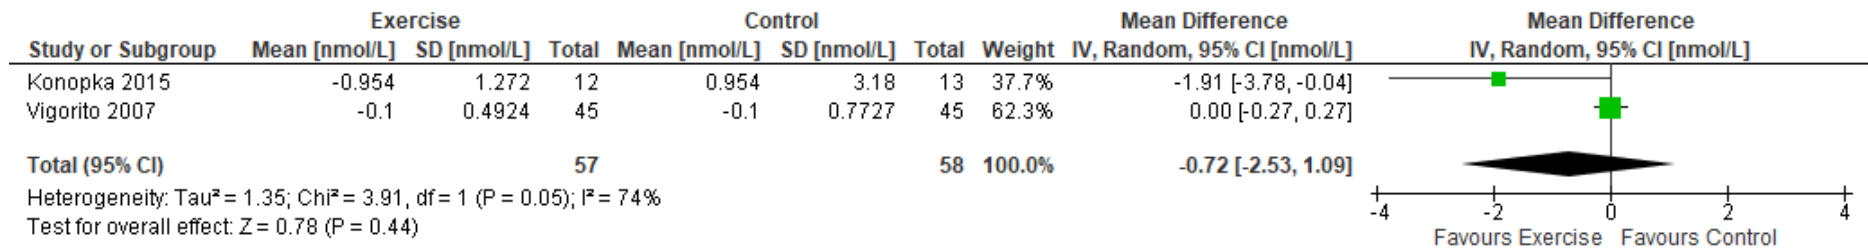

**Supporting Figure: Change from baseline prolactin (ng/mL); exercise versus control**

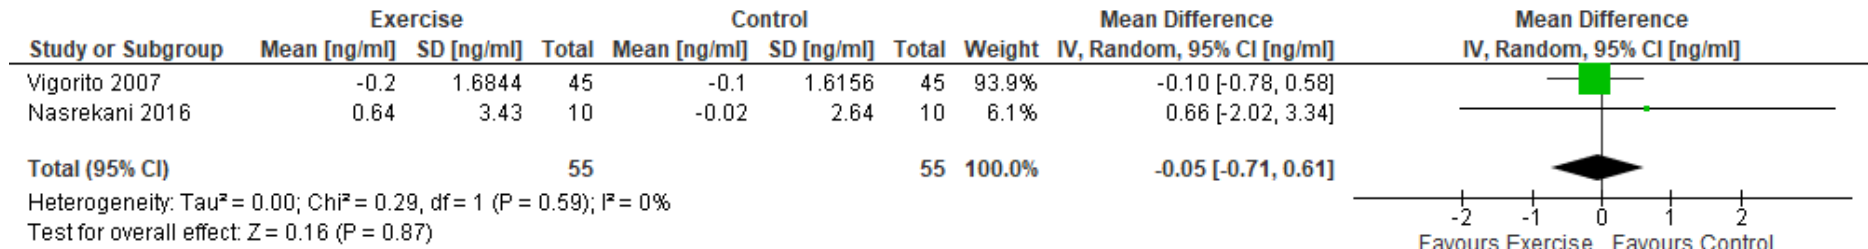

**Supporting Figure: Post-intervention prolactin (ng/mL); exercise versus control**

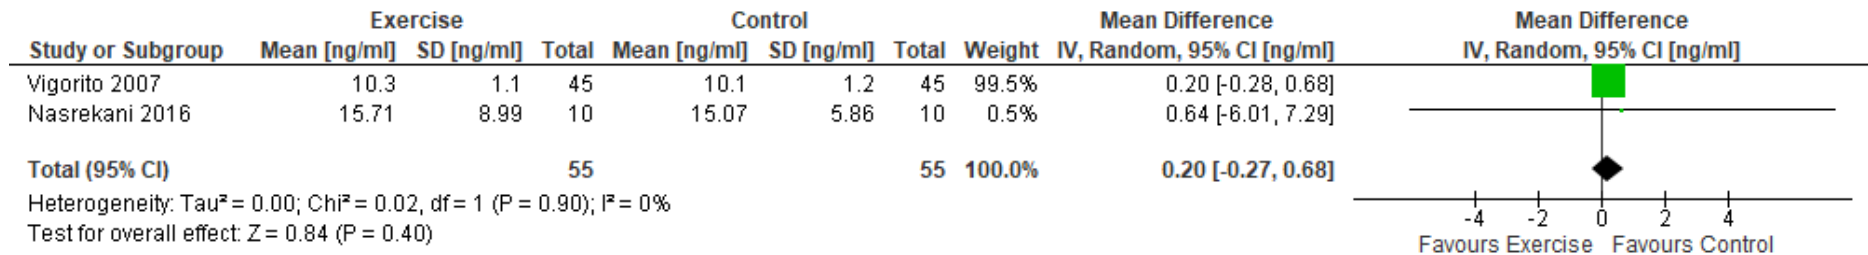



**Supporting Figure: Change from baseline high-sensitivity C-reactive protein (mg/L); exercise versus control**

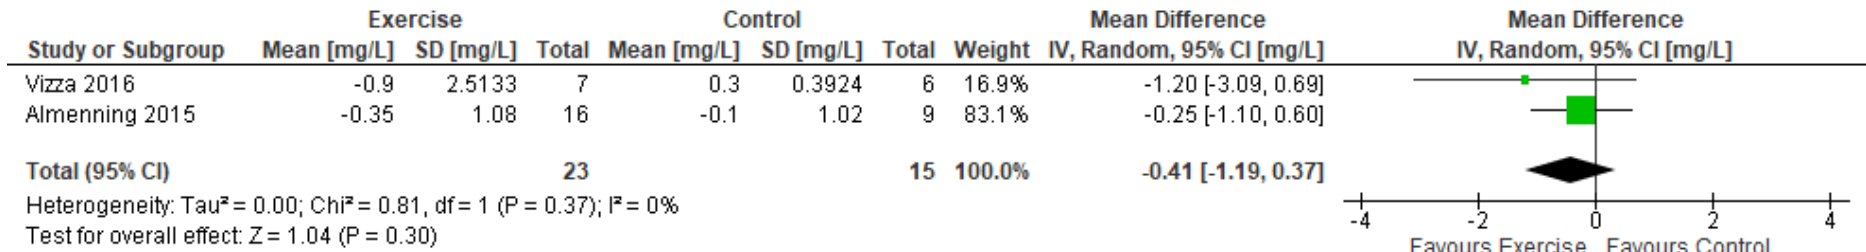

**Supporting Figure: Post-intervention high-sensitivity C-reactive protein (mg/L); exercise versus control**

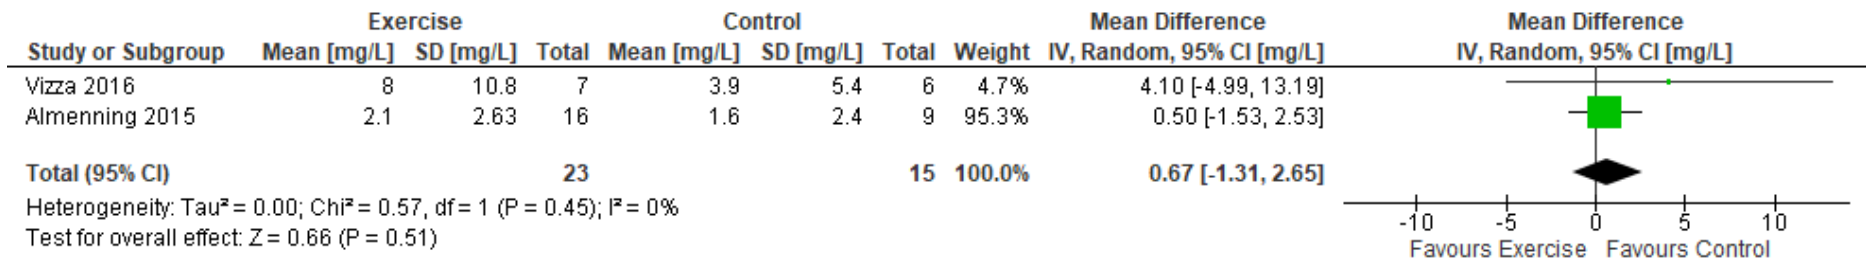

**Supporting Figure: Change from baseline anti-Müllerian hormone (ng/mL); exercise versus control**

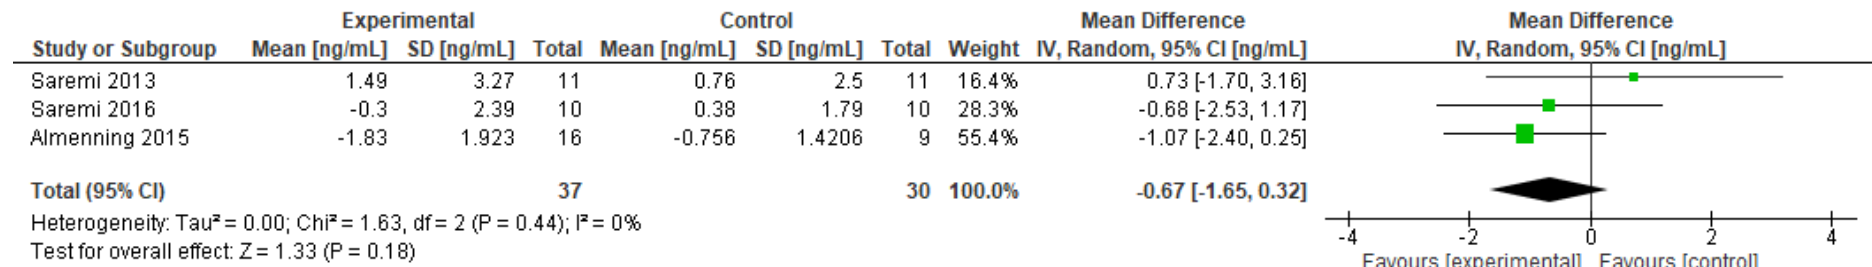

**Supporting Figure: Post-intervention anti-Müllerian hormone (ng/mL); exercise versus control**

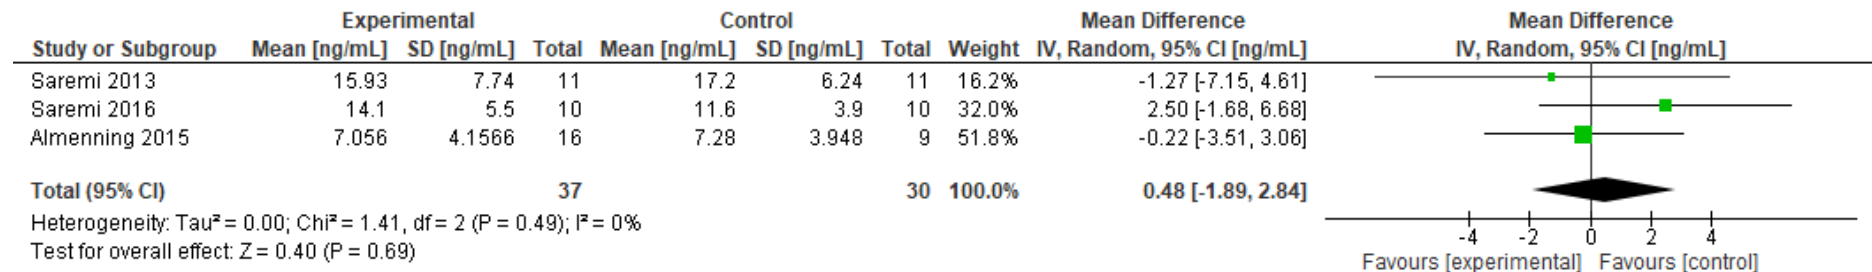

**Supporting Figure: Change from baseline adiponectin (µg/mL); exercise versus control**

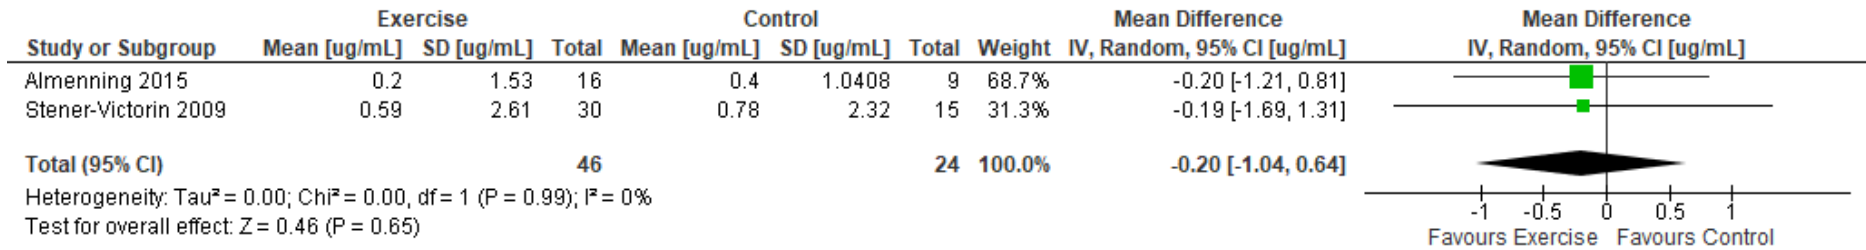

## Supporting Figure: Change from baseline PCOS-Q domains; exercise versus control

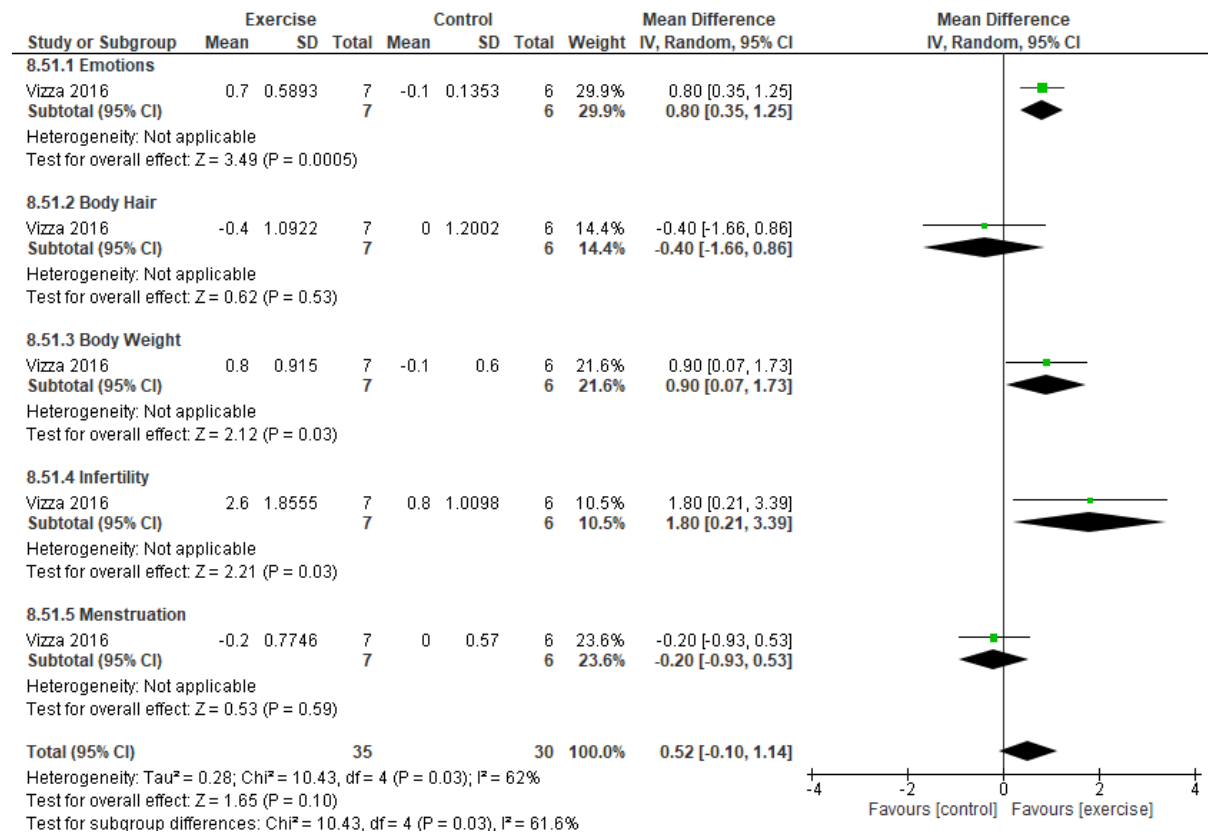

**Supplementary Meta-Analyses – Exercise and Diet versus Diet**

**Supporting Figure: Change from baseline fasting blood glucose (mg/dL); exercise and diet versus diet**

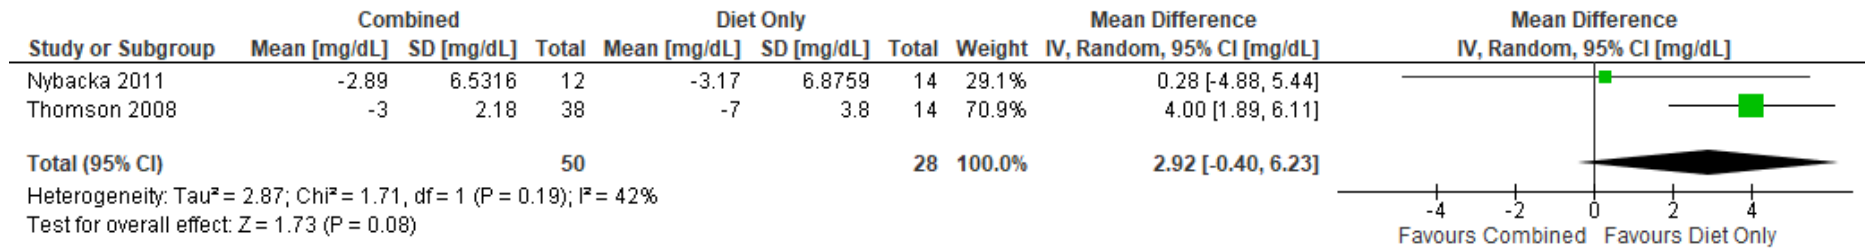

**Supporting Figure: Post-intervention fasting blood glucose (mg/dL); exercise and diet versus diet**

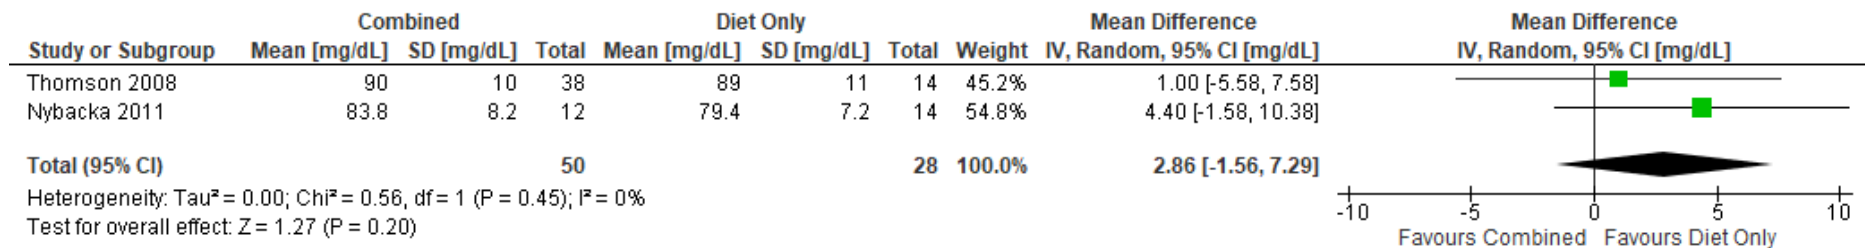

**Supporting Figure: Change from baseline fasting insulin ( $\mu\text{IU}/\text{mL}$ ); exercise and diet versus diet**

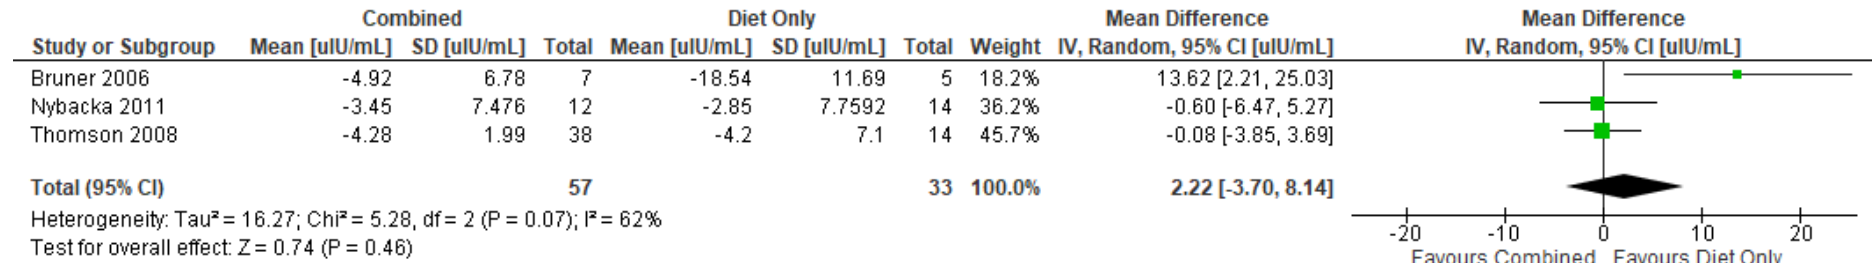

**Supporting Figure: Post-intervention fasting insulin ( $\mu\text{IU}/\text{mL}$ ); exercise and diet versus diet**

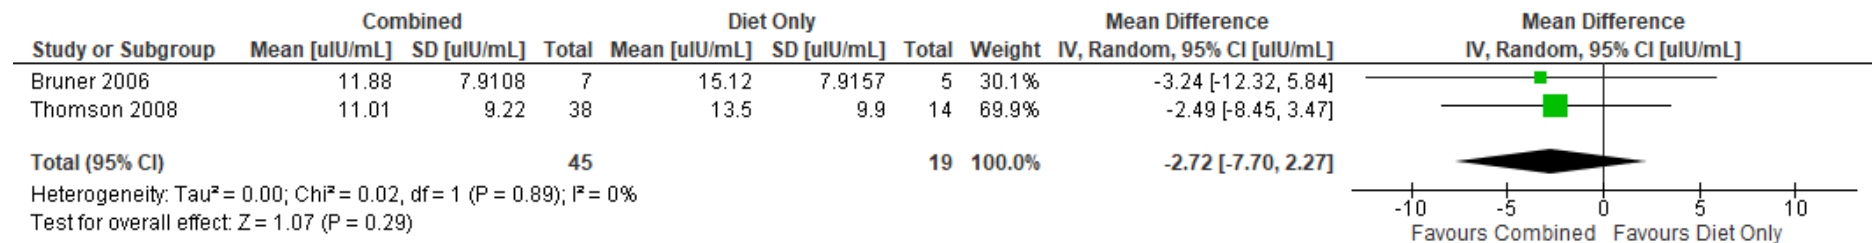

**Supporting Figure: Change from baseline HOMA-IR; exercise and diet versus diet**

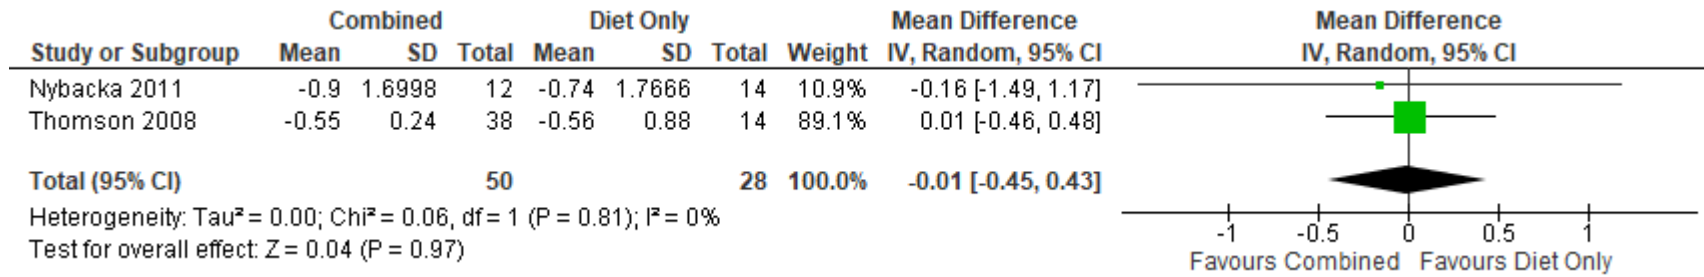

**Supporting Figure: Change from baseline body mass (kg); exercise and diet versus diet**

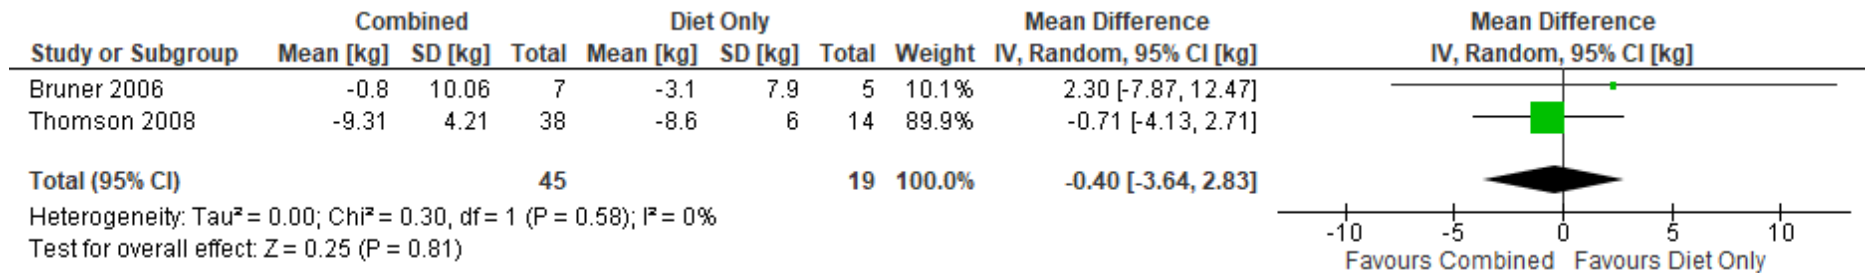

**Supporting Figure: Post-intervention body mass (kg); exercise and diet versus diet**

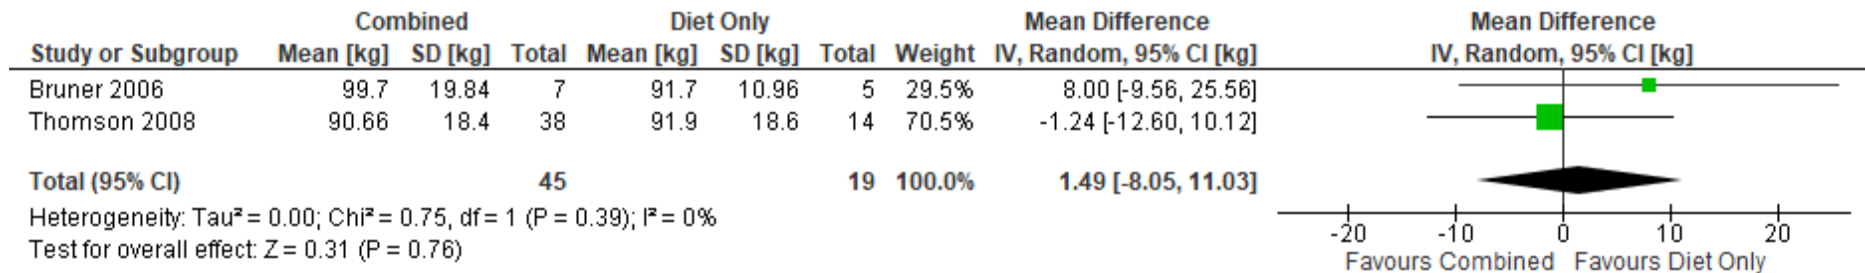



**Supporting Figure: Change from baseline body mass index (kg/m<sup>2</sup>); exercise and diet versus diet**

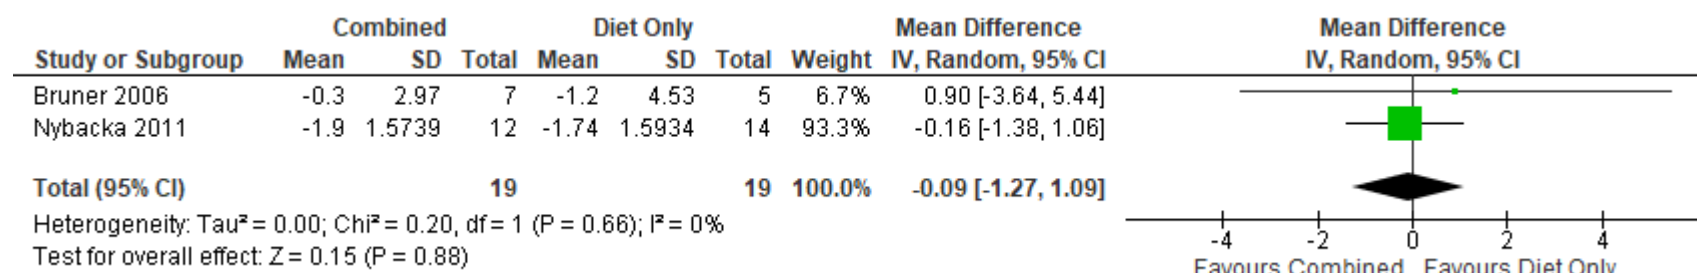

**Supporting Figure: Post-intervention body mass index (kg/m<sup>2</sup>); exercise and diet versus diet**

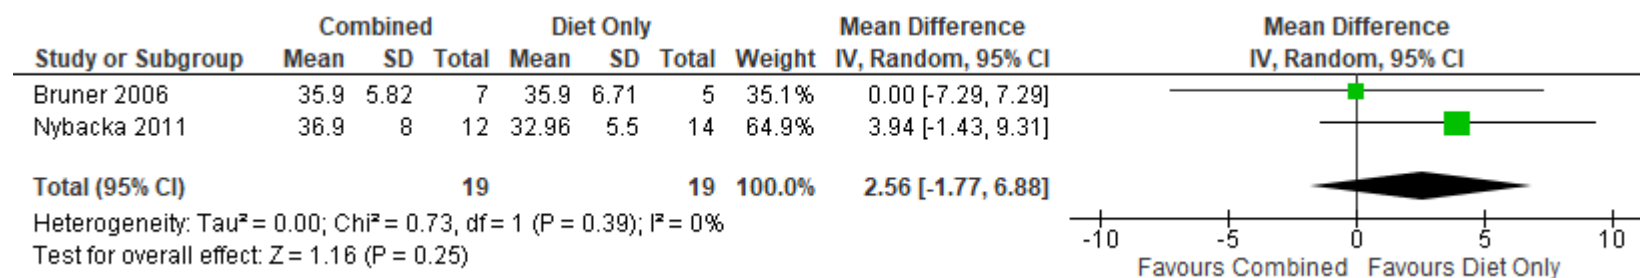

**Supporting Figure: Change from baseline waist circumference (cm); exercise and diet versus diet**

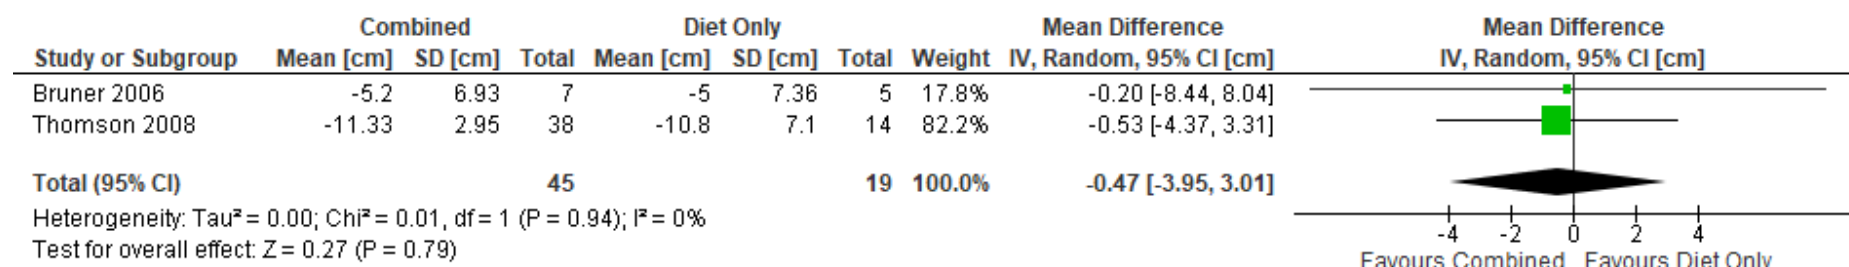

**Supporting Figure: Post-intervention waist circumference (cm); exercise and diet versus diet**

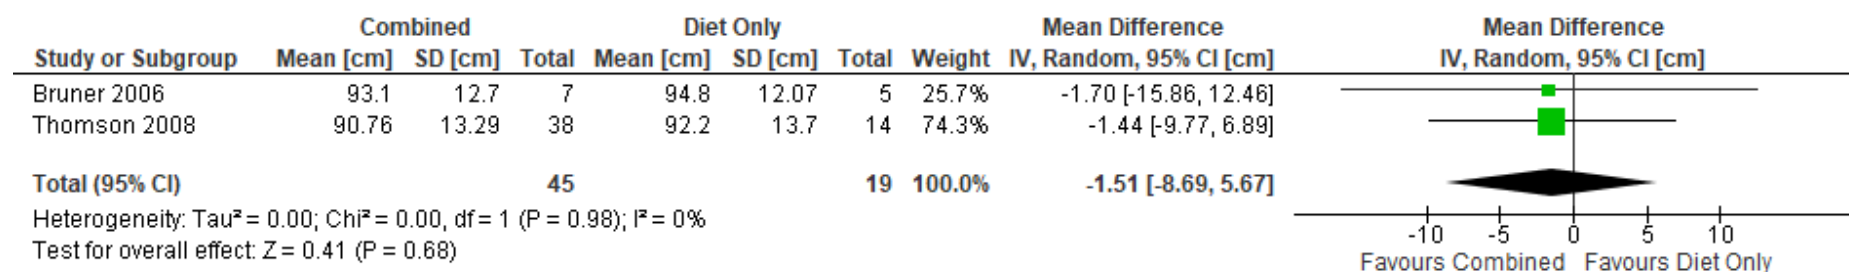

**Supporting Figure: Change from baseline body fat percentage (%); exercise and diet versus diet**

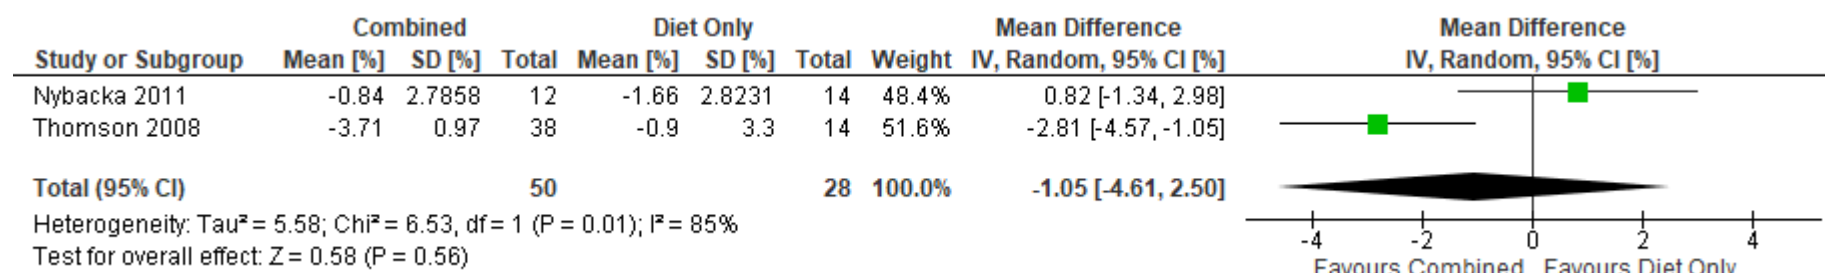

**Supporting Figure: Post-intervention body fat percentage (%); exercise and diet versus diet**

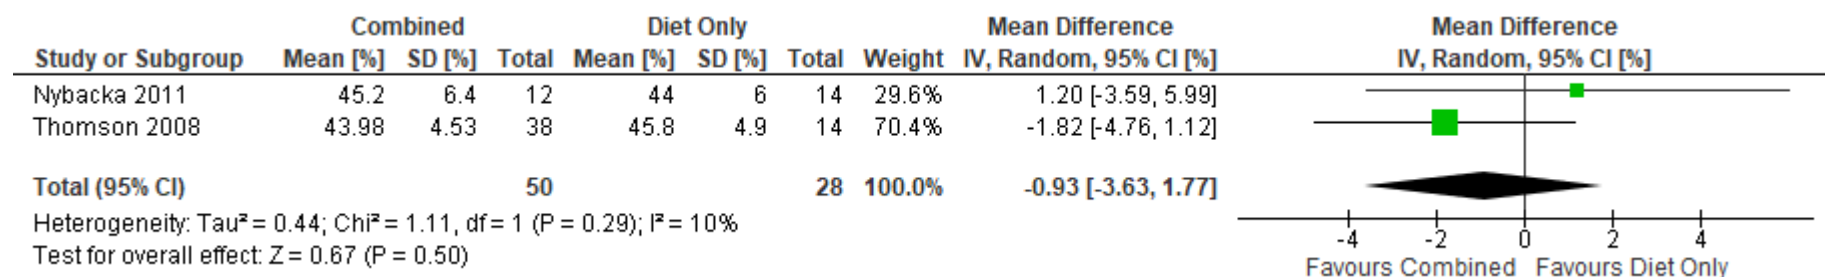

**Supporting Figure: Change from baseline fat free mass (kg); exercise and diet versus diet**

| Study or Subgroup     | Combined  |         | Total     | Diet Only |         | Total     | Weight        | Mean Difference         |                         |
|-----------------------|-----------|---------|-----------|-----------|---------|-----------|---------------|-------------------------|-------------------------|
|                       | Mean [kg] | SD [kg] |           | Mean [kg] | SD [kg] |           |               | IV, Random, 95% CI [kg] | IV, Random, 95% CI [kg] |
| Thomson 2008          | -1.52     | 2.06    | 38        | -3.8      | 3.8     | 14        | 49.2%         | 2.28                    | [0.18, 4.38]            |
| Nybacka 2011          | -2.66     | 2.3294  | 12        | -1.23     | 2.5806  | 14        | 50.8%         | -1.43                   | [-3.32, 0.46]           |
| <b>Total (95% CI)</b> |           |         | <b>50</b> |           |         | <b>28</b> | <b>100.0%</b> | <b>0.40</b>             | <b>[-3.24, 4.03]</b>    |

Heterogeneity: Tau<sup>2</sup> = 5.85; Chi<sup>2</sup> = 6.65, df = 1 (P = 0.010); I<sup>2</sup> = 85%  
 Test for overall effect: Z = 0.21 (P = 0.83)

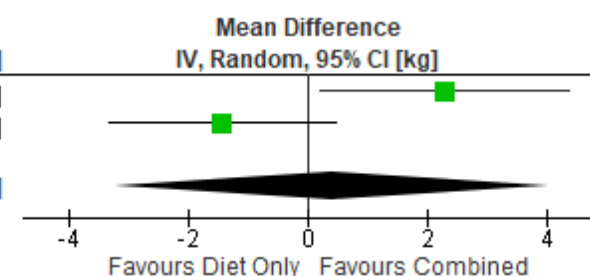

**Supporting Figure: Post-intervention fat free mass (kg); exercise and diet versus diet**

| Study or Subgroup     | Combined  |         | Total     | Diet Only |         | Total     | Weight        | Mean Difference         |                         |
|-----------------------|-----------|---------|-----------|-----------|---------|-----------|---------------|-------------------------|-------------------------|
|                       | Mean [kg] | SD [kg] |           | Mean [kg] | SD [kg] |           |               | IV, Random, 95% CI [kg] | IV, Random, 95% CI [kg] |
| Thomson 2008          | 50.24     | 8.97    | 38        | 49.3      | 9.3     | 14        | 45.1%         | 0.94                    | [-4.70, 6.58]           |
| Nybacka 2011          | 49.7      | 7.6     | 12        | 46.7      | 5.3     | 14        | 54.9%         | 3.00                    | [-2.12, 8.12]           |
| <b>Total (95% CI)</b> |           |         | <b>50</b> |           |         | <b>28</b> | <b>100.0%</b> | <b>2.07</b>             | <b>[-1.72, 5.86]</b>    |

Heterogeneity: Tau<sup>2</sup> = 0.00; Chi<sup>2</sup> = 0.28, df = 1 (P = 0.60); I<sup>2</sup> = 0%  
 Test for overall effect: Z = 1.07 (P = 0.28)

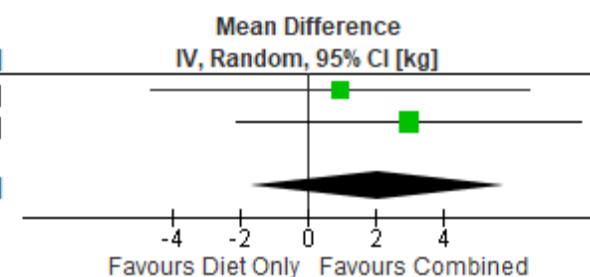

**Supporting Figure: Change from baseline total testosterone (nmol/L); exercise and diet versus diet**

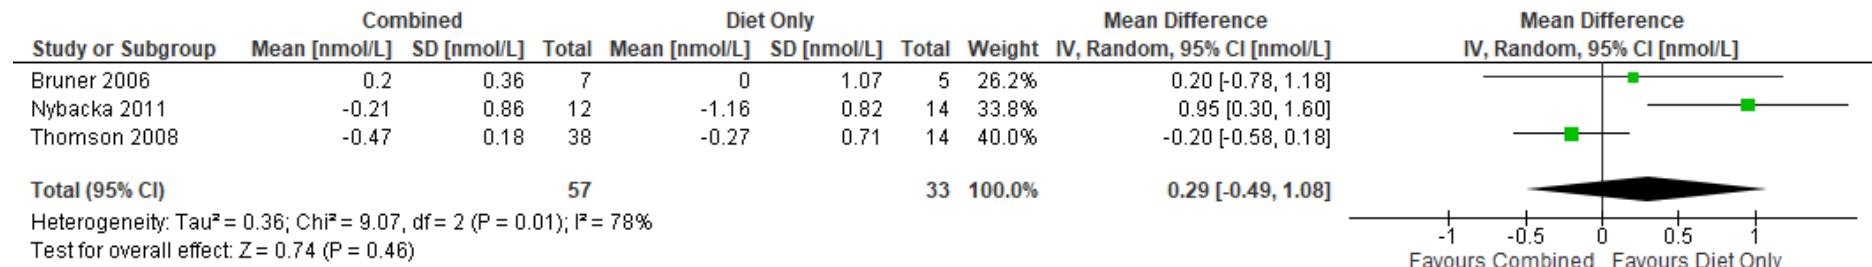

**Supporting Figure: Post-intervention total testosterone (nmol/L); exercise and diet versus diet**

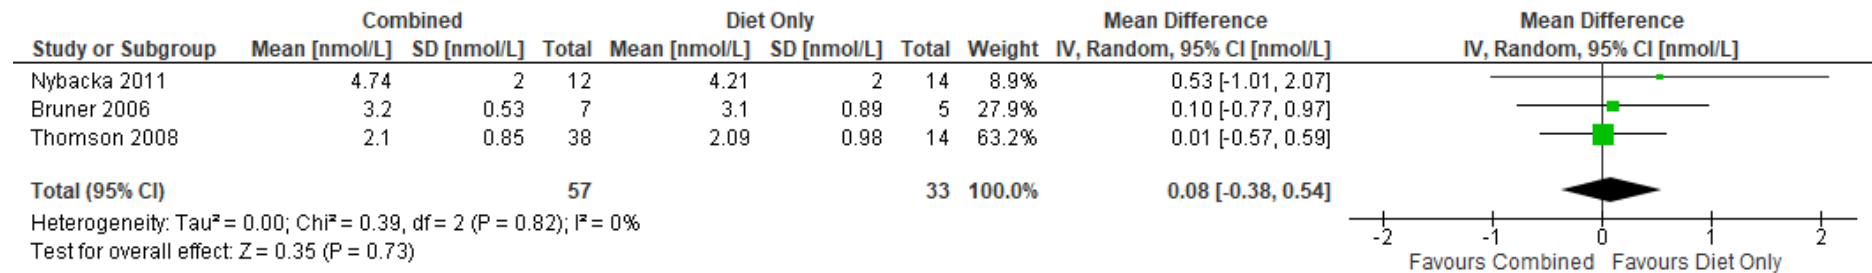

**Supporting Figure: Change from baseline sex hormone binding globulin (nmol/L); exercise and diet versus diet**

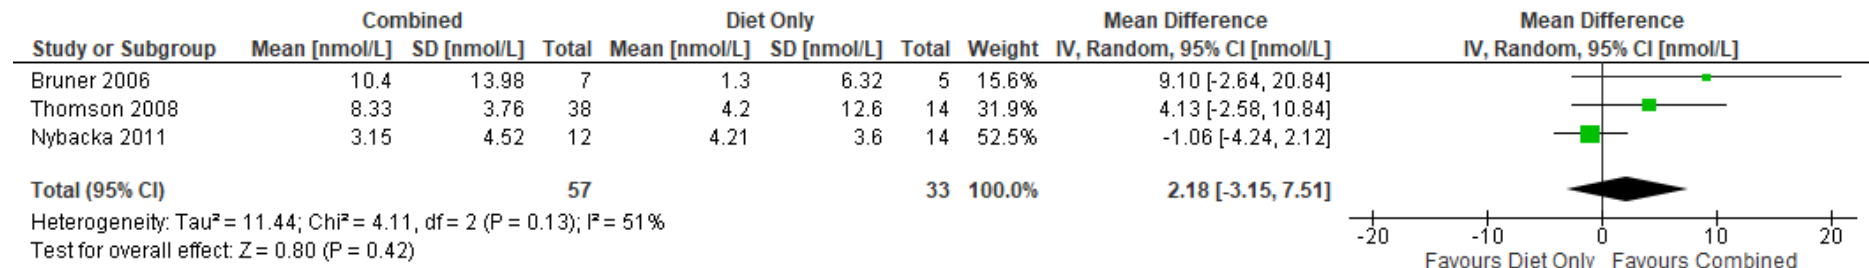

**Supporting Figure: Post-intervention sex hormone binding globulin (nmol/L); exercise and diet versus diet**

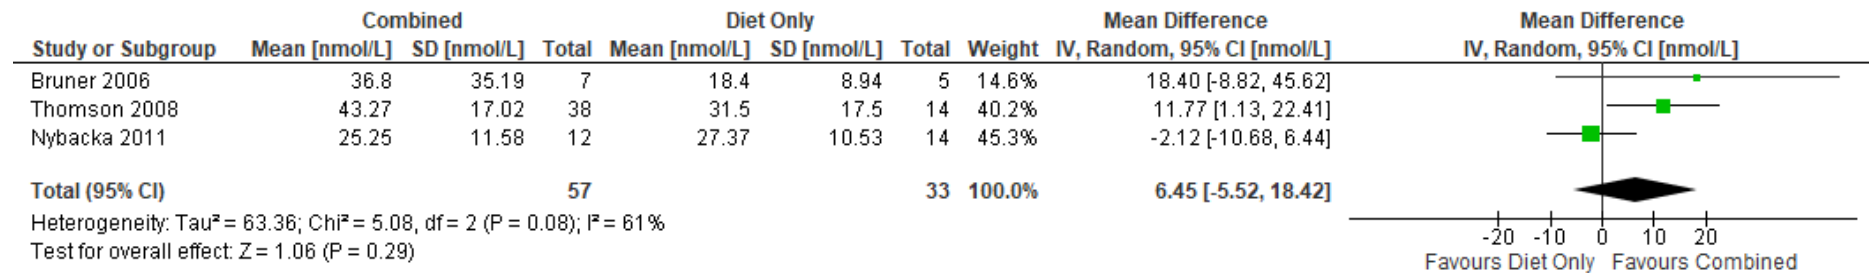

**Supporting Figure: Change from baseline free androgen index; exercise and diet versus diet**

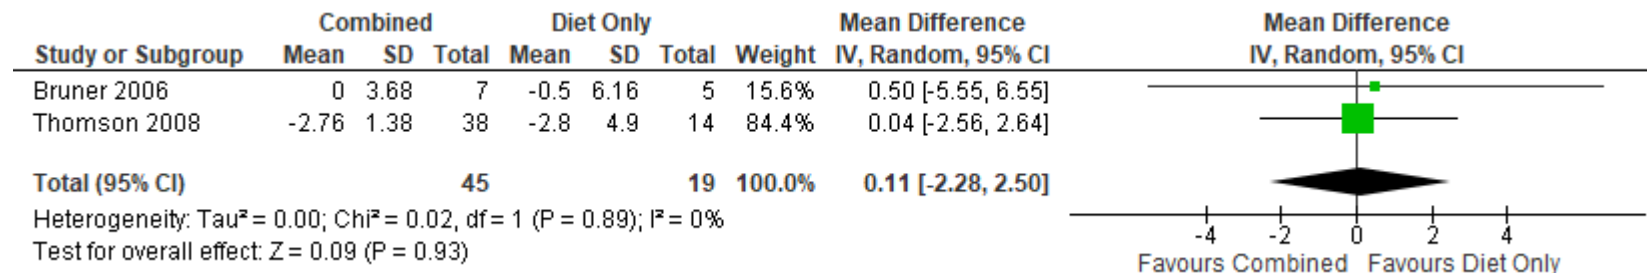

**Supporting Figure: Post-intervention free androgen index; exercise and diet versus diet**

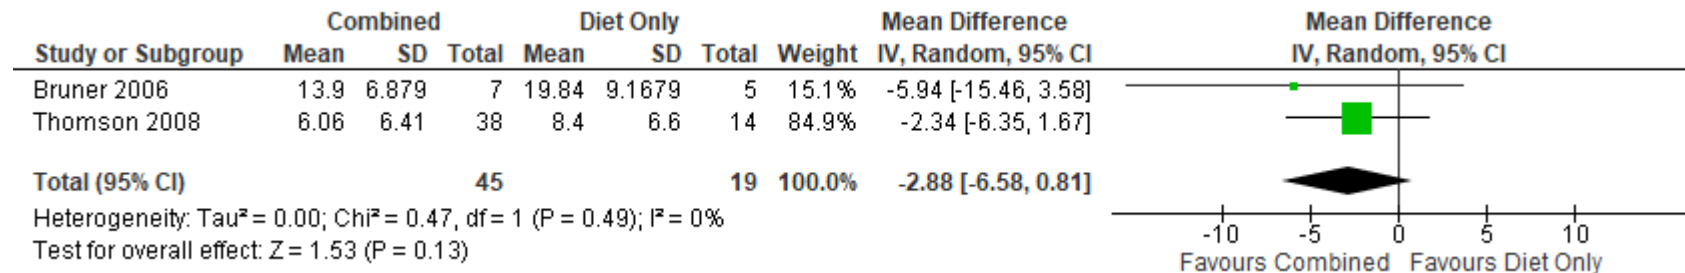

Supplement: MOESM4 [file 16466444]
