# Supplementary material for: Exercise, or exercise and diet for the management of polycystic ovary syndrome: a systematic review and meta-analysis
Source: Syst Rev. 2019 Feb 12;8:51. doi: 10.1186/s13643-019-0962-3 (PMC6371542; doi:10.1186/s13643-019-0962-3)
Supplement: Supplementary file 1 — Table S1. Search algorithm; Table S2. Review authors’ judgement on risk of bias; Table S3. Details of excluded studies and reasons for exclusion; Table S4. Diagnostic criteria/definition applied for PCOS; Table S5 Effect estimates and heterogeneity from subgroup analyses in blood pressure and metabolism-related outcomes; Table S6. Effect estimates and heterogeneity from subgroup analyses in lipid-related outcomes; Table S7. Effect estimates and heterogeneity from subgroup analyses in cardiorespiratory, anthropometric and body composition related outcomes; Table S8. Effect estimates and heterogeneity from subgroup analyses in androgenic and inflammatory outcomes; Table S9. Exercise vs control—Summary of findings from investigative outcomes that were only reported in single trials; Table S10. Exercise and diet vs control—Summary of findings from investigative outcomes that were only reported in single trials; Table S11. Effect estimates and heterogeneity for change from baseline to immediately post-intervention, and immediately post-intervention values only, for all outcomes analysed in the comparison exercise and diet versus diet only; Table S12. Exercise and diet vs diet—summary of findings from investigative outcomes that were only reported in single trials (PDF 296 kb) [file 13643_2019_962_MOESM1_ESM.pdf]

## Exercise and diet for the management of polycystic ovary syndrome: a systematic review and meta-analysis - Supplementary Data

**Supplementary Table 1.** Search algorithm as developed for advanced search in PubMed database. This algorithm was further adapted and implemented across CENTRAL (in the Cochrane Library), CINAHL, SCOPUS, EMBASE (via Web of Science), SportDiscus (via EBSCOhost) and PsycINFO (via OvidSP).

| Search | Query                                                                                                                                                                                                       |
|--------|-------------------------------------------------------------------------------------------------------------------------------------------------------------------------------------------------------------|
| #1     | Polycystic ovary syndrome [MeSH Terms]                                                                                                                                                                      |
| #2     | Polycystic ovar* [Title/Abstract]                                                                                                                                                                           |
| #3     | PCOS [Title/Abstract]                                                                                                                                                                                       |
| #4     | PCOD [Title/Abstract]                                                                                                                                                                                       |
| #5     | Stein levent* [Title/Abstract]                                                                                                                                                                              |
| #6     | PCO [Title/Abstract]                                                                                                                                                                                        |
| #7     | #1 OR #2 OR #3 OR #4 OR #5 OR #6                                                                                                                                                                            |
| #8     | Exercise [MeSH Terms]                                                                                                                                                                                       |
| #9     | Exercise movement techniques [MeSH Terms]                                                                                                                                                                   |
| #10    | Exercise Therapy [MeSH Terms]                                                                                                                                                                               |
| #11    | Exercise [Title/Abstract]                                                                                                                                                                                   |
| #12    | Physical education and training [MeSH Terms]                                                                                                                                                                |
| #13    | Physical fitness [MeSH Terms]                                                                                                                                                                               |
| #14    | Physical fitness [Title/Abstract]                                                                                                                                                                           |
| #15    | Physical exertion [MeSH Terms]                                                                                                                                                                              |
| #16    | Sports [MeSH Terms]                                                                                                                                                                                         |
| #17    | Physical Activity [MeSH Terms]                                                                                                                                                                              |
| #18    | Sport* [Title/Abstract]                                                                                                                                                                                     |
| #19    | Physical activity [Title/Abstract]                                                                                                                                                                          |
| #20    | Physical activities [Title/Abstract]                                                                                                                                                                        |
| #21    | Walking [MeSH Terms]                                                                                                                                                                                        |
| #22    | Walk* [Title/Abstract]                                                                                                                                                                                      |
| #23    | Resistance Training [MeSH Terms]                                                                                                                                                                            |
| #24    | Muscle training [Title/Abstract]                                                                                                                                                                            |
| #25    | Strength training [Title/Abstract]                                                                                                                                                                          |
| #26    | Endurance training [Title/Abstract]                                                                                                                                                                         |
| #27    | Interval training [Title/Abstract]                                                                                                                                                                          |
| #28    | Intermittent training [Title/Abstract]                                                                                                                                                                      |
| #29    | Fitness[Title/Abstract]                                                                                                                                                                                     |
| #30    | Swimming [MeSH Terms]                                                                                                                                                                                       |
| #31    | Swim* [Title/Abstract]                                                                                                                                                                                      |
| #32    | Bicycling [MeSH Terms]                                                                                                                                                                                      |
| #33    | Bicycl* [Title/Abstract]                                                                                                                                                                                    |
| #34    | Cycling [Title/Abstract]                                                                                                                                                                                    |
| #35    | Cycle [Title/Abstract]                                                                                                                                                                                      |
| #36    | Strengthening [Title/Abstract]                                                                                                                                                                              |
| #37    | #8 OR #9 OR #10 OR #11 OR #12 OR #13 OR #14 OR #15 OR #16 OR #17 OR #18<br>OR #19 OR #20 OR #21 OR #22 OR #23 OR #24 OR #25 OR #26 OR #27 OR #28 OR<br>#29 OR #30 OR #31 OR #32 OR #33 OR #34 OR #35 OR #36 |
| #38    | #7 AND #37                                                                                                                                                                                                  |
| #39    | Randomized controlled trial [Publication Type]                                                                                                                                                              |
| #40    | Controlled clinical trial [Publication Type]                                                                                                                                                                |

---

|            |                                                          |
|------------|----------------------------------------------------------|
| <b>#41</b> | Randomized [Title/Abstract]                              |
| <b>#42</b> | Placebo [Title/Abstract]                                 |
| <b>#43</b> | Clinical trial as topic [MeSH Terms]                     |
| <b>#44</b> | Randomly [Title/Abstract]                                |
| <b>#45</b> | Trial [Title]                                            |
| <b>#46</b> | #39 OR #40 OR #41 OR #42 OR #43 OR #44 OR #45            |
| <b>#47</b> | #38 AND #46                                              |
| <b>#48</b> | Animals [MeSH Major Topic] NOT Humans [MeSH Major Topic] |
| <b>#49</b> | #47 NOT #48                                              |

---

**Supplementary Table 2.** Review of authors' judgements about each risk of bias item for each included study. Support for judgement based upon evidence presented within each paper.

| <b>Trial</b>          | <b>Bias Domain</b> | <b>Source of Bias</b>                  | <b>Author's judgement</b> | <b>Support for judgement</b>                                                                                                                                                                                                                                 |
|-----------------------|--------------------|----------------------------------------|---------------------------|--------------------------------------------------------------------------------------------------------------------------------------------------------------------------------------------------------------------------------------------------------------|
| Almenning et al. [32] | Selection Bias     | Random sequence generation             | Low Risk                  | Women were stratified by BMI and allocated in a 1:1:1 manner to study arms. Computer number random generator developed and administered to randomise subjects.                                                                                               |
|                       |                    | Allocation concealment                 | Low Risk                  | Baseline testing was done before randomisation                                                                                                                                                                                                               |
|                       | Performance Bias   | Blinding of participants and personnel | High Risk                 | Impossible to blind participants and personnel due to nature of the trial ( <i>i.e.</i> supervised exercise sessions)                                                                                                                                        |
|                       | Detection Bias     | Blinding of outcome assessment         | High Risk                 | Follow-up testing was performed, and these measurements were done non-blinded to group assignment. An observer blinded for group allocation analysed the FMD.                                                                                                |
|                       | Attrition Bias     | Incomplete outcome data                | Low Risk                  | 89 participants assessed for eligibility; 58 excluded and reasons provided. 31 randomised and allocated 10:11:10. 6 (19%) lost to follow up (reasons provided) and data analysis completed on those remaining. Consort flow diagram used.                    |
|                       | Reporting Bias     | Selective reporting                    | Low Risk                  | Trial preregistered on ClinicalTrials.gov (NCT01919281) and all proposed outcomes reported in paper.                                                                                                                                                         |
|                       | Other bias         | Group similarity at baseline           | Low Risk                  | FMD% significantly lower in HIT group. No other significant differences at baseline.                                                                                                                                                                         |
|                       |                    | Adherence                              | Low Risk                  | 87% for RT arm and 90% for HIT arm.                                                                                                                                                                                                                          |
|                       |                    | Contamination                          | Unclear Risk              | Physical activity in control group not reported                                                                                                                                                                                                              |
| Brown et al. [96]     | Selection Bias     | Random sequence generation             | Low Risk                  | Randomisation was accomplished by generating a random sequence of two variables (representing the two treatment groups) using the online program at <a href="http://graphpadcom/quickcalcs/randomize2.cfm">http://graphpadcom/quickcalcs/randomize 2.cfm</a> |

|                    |                  |                                        |              |                                                                                                                                                                                                                                                                      |
|--------------------|------------------|----------------------------------------|--------------|----------------------------------------------------------------------------------------------------------------------------------------------------------------------------------------------------------------------------------------------------------------------|
|                    |                  | Allocation concealment                 | Low Risk     | Each group assignment was placed in its own sequentially numbered envelope by an individual not involved in the study. Participants were assigned to a group based on these envelopes, and each participant had an equal chance of being randomised to either group. |
|                    | Performance Bias | Blinding of participants and personnel | High Risk    | Impossible to blind participants and personnel due to nature of the trial (i.e. supervised exercise sessions)                                                                                                                                                        |
|                    | Detection Bias   | Blinding of outcome assessment         | High Risk    | Not reported                                                                                                                                                                                                                                                         |
|                    | Attrition Bias   | Incomplete outcome data                | High Risk    | Attrition is reported in study but considerably greater in exercise group. Acknowledged as a limitation in study and reasons for attrition not clearly stated. Overall attrition reported as 43%.                                                                    |
|                    | Reporting Bias   | Selective reporting                    | Unclear Risk | Unable to locate prospectively published trial protocol                                                                                                                                                                                                              |
|                    | Other bias       | Group similarity at baseline           | High Risk    | Significant differences in age and lipid profiles. Also, although not statistically significant, exercisers tended to be heavier, less hyperandrogenic, less fit and more insulin resistant.                                                                         |
|                    |                  | Adherence                              | Low Risk     | 89.8% adherence to exercise reported                                                                                                                                                                                                                                 |
|                    |                  | Contamination                          | Unclear Risk | Physical activity in control group not reported                                                                                                                                                                                                                      |
| Bruner et al. [97] | Selection Bias   | Random sequence generation             | Unclear Risk | Not reported                                                                                                                                                                                                                                                         |
|                    |                  | Allocation concealment                 | Low Risk     | Researcher chose a sealed envelope for each participant indicating which treatment they would receive.                                                                                                                                                               |
|                    | Performance Bias | Blinding of participants and personnel | High Risk    | Impossible to blind participants and personnel due to nature of the trial (i.e. supervised exercise sessions).                                                                                                                                                       |
|                    | Detection Bias   | Blinding of outcome assessment         | High Risk    | Not reported                                                                                                                                                                                                                                                         |
|                    | Attrition Bias   | Incomplete outcome data                | High Risk    | Attrition not reported. There are data missing from results; LH:FSH - 2 women in EN group (lab error & pregnancy); FI - 1 from EN & 1 from N (lab error).                                                                                                            |
|                    | Reporting Bias   | Selective reporting                    | Unclear Risk | Unable to locate prospectively published trial protocol.                                                                                                                                                                                                             |

|                        |                    |                                        |                            |                                                                                                                                                                                                                                  |
|------------------------|--------------------|----------------------------------------|----------------------------|----------------------------------------------------------------------------------------------------------------------------------------------------------------------------------------------------------------------------------|
|                        | Other bias         | Group similarity at baseline           | Low Risk                   | No significant difference between groups for all outcomes.                                                                                                                                                                       |
|                        |                    | Adherence                              | Unclear Risk               | Not reported                                                                                                                                                                                                                     |
|                        |                    | Contamination                          | Unclear Risk               | Physical activity in control group not reported                                                                                                                                                                                  |
|                        |                    |                                        |                            |                                                                                                                                                                                                                                  |
| Guzick et al. [98]     | Selection Bias     | Random sequence generation             | Unclear Risk               | Subjects were randomised method used, not reported                                                                                                                                                                               |
|                        |                    | Allocation concealment                 | Unclear Risk               | Not reported                                                                                                                                                                                                                     |
|                        | Performance Bias   | Blinding of participants and personnel | High Risk                  | Impossible to blind participants and personnel due to nature of the trial ( <i>i.e.</i> supervised exercise sessions).                                                                                                           |
|                        | Detection Bias     | Blinding of outcome assessment         | High Risk                  | Not reported                                                                                                                                                                                                                     |
|                        | Attrition Bias     | Incomplete outcome data                | Low Risk                   | Reports those who were excluded during screening. 12 participants randomised; results for 12 presented in findings. No missing data.                                                                                             |
|                        | Reporting Bias     | Selective reporting                    | Unclear Risk               | Unable to locate prospectively published trial protocol.                                                                                                                                                                         |
|                        | Other bias         | Group similarity at baseline           | Low Risk                   | No significant difference between treatment and control subjects for key outcomes of interest.                                                                                                                                   |
|                        |                    | Adherence                              | Unclear Risk               | Not reported                                                                                                                                                                                                                     |
|                        |                    | Contamination                          | Unclear Risk               | Physical activity in control group not reported                                                                                                                                                                                  |
|                        | Hoeger et al. [99] | Selection Bias                         | Random sequence generation | Low Risk                                                                                                                                                                                                                         |
| Allocation concealment |                    |                                        | Unclear Risk               | The block schedule was blinded to the investigators. Methods not reported.                                                                                                                                                       |
| Performance Bias       |                    | Blinding of participants and personnel | High Risk                  | Impossible to blind participants and personnel due to nature of the trial ( <i>i.e.</i> supervised exercise sessions). However, participants and investigators double blinded to placebo or metformin by independent pharmacist. |
| Detection Bias         |                    | Blinding of outcome assessment         | High Risk                  | Not reported                                                                                                                                                                                                                     |
| Attrition Bias         |                    | Incomplete outcome data                | High Risk                  | Detailed analysis of attrition and adherence throughout. Balanced attrition across groups and explanations given for drop out. However, attrition is high in trial (39%).                                                        |
|                        |                    |                                        |                            |                                                                                                                                                                                                                                  |

|                        |                        |                                        |                            |                                                                                                                                      |
|------------------------|------------------------|----------------------------------------|----------------------------|--------------------------------------------------------------------------------------------------------------------------------------|
|                        | Reporting Bias         | Selective reporting                    | Unclear Risk               | Unable to locate prospectively published trial protocol.                                                                             |
|                        | Other bias             | Group similarity at baseline           | Low Risk                   | No significant differences between groups for all outcomes.                                                                          |
|                        |                        | Adherence                              | Unclear Risk               | Not reported                                                                                                                         |
|                        |                        | Contamination                          | Unclear Risk               | Physical activity in control group not reported                                                                                      |
| Konopka et al [101]    | Selection Bias         | Random sequence generation             | Unclear Risk               | Women were randomised but unclear what method was used to do this.                                                                   |
|                        |                        | Allocation concealment                 | Unclear Risk               | Women were assessed before and after the intervention. Unclear when randomisation took place and whether investigators were blinded. |
|                        | Performance Bias       | Blinding of participants and personnel | High Risk                  | Impossible to blind participants and personnel due to nature of the trial ( <i>i.e.</i> supervised exercise sessions).               |
|                        | Detection Bias         | Blinding of outcome assessment         | High Risk                  | Not reported                                                                                                                         |
|                        | Attrition Bias         | Incomplete outcome data                | High Risk                  | No attrition reported. However, hyperinsulinemic-euglycemic clamp only completed in a subset of obese women.                         |
|                        | Reporting Bias         | Selective reporting                    | Low Risk                   | Trial preregistered on ClinicalTrials.gov (NCT02105428 and NCT01477164).                                                             |
|                        | Other bias             | Group similarity at baseline           | Low Risk                   | No significant differences between groups for all outcomes.                                                                          |
|                        |                        | Adherence                              | Unclear Risk               | Not reported.                                                                                                                        |
|                        |                        | Contamination                          | Unclear Risk               | Physical activity in control group not reported.                                                                                     |
|                        | Nasrekani et al. [103] | Selection Bias                         | Random sequence generation | Unclear Risk                                                                                                                         |
| Allocation concealment |                        |                                        | Unclear Risk               | Not reported whether assessors were blinded to allocation. Randomisation occurred before baseline measurements.                      |
| Performance Bias       |                        | Blinding of participants and personnel | High Risk                  | Impossible to blind participants and personnel due to nature of the trial ( <i>i.e.</i> supervised exercise sessions).               |
| Detection Bias         |                        | Blinding of outcome                    | High Risk                  | Not reported.                                                                                                                        |

|                          |                  |                                        |              |                                                                                                                                      |
|--------------------------|------------------|----------------------------------------|--------------|--------------------------------------------------------------------------------------------------------------------------------------|
|                          |                  | assessment                             |              |                                                                                                                                      |
|                          | Attrition Bias   | Incomplete outcome data                | Low Risk     | 20 participants randomised and all data reported. No use of Consort flow diagram.                                                    |
|                          | Reporting Bias   | Selective reporting                    | Unclear Risk | Unable to locate prospectively published trial protocol.                                                                             |
|                          | Other bias       | Group similarity at baseline           | Low Risk     | No significant differences between groups for all outcomes.                                                                          |
|                          |                  | Adherence                              | Unclear Risk | Not reported.                                                                                                                        |
|                          |                  | Contamination                          | Unclear Risk | Physical activity in control group not reported                                                                                      |
| Nybacka et al. [104-105] | Selection Bias   | Random sequence generation             | Low Risk     | The randomisation was carried out with the permuted-block randomization method with ten blocks and a block size of 6.                |
|                          |                  | Allocation concealment                 | Unclear Risk | Not reported.                                                                                                                        |
|                          | Performance Bias | Blinding of participants and personnel | High Risk    | Impossible to blind participants and personnel due to nature of the trial ( <i>i.e.</i> supervised exercise sessions).               |
|                          | Detection Bias   | Blinding of outcome assessment         | High Risk    | Same investigators completed outcome assessments but unclear whether they were blinded to allocation. Blinding unlikely.             |
|                          | Attrition Bias   | Incomplete outcome data                | High Risk    | Attrition is reported for each arm. Higher in 2 groups. But overall 25%. Reasons stated as personal or medical grounds.              |
|                          | Reporting Bias   | Selective reporting                    | Unclear Risk | Unable to locate prospectively published trial protocol.                                                                             |
|                          | Other bias       | Group similarity at baseline           | Low Risk     | Baseline characteristics were comparable regarding age, BMI, body composition, and endocrine, metabolic and gynaecological outcomes. |
|                          |                  | Adherence                              | Unclear Risk | Not reported.                                                                                                                        |
|                          |                  | Contamination                          | Unclear Risk | Physical activity in control group not reported                                                                                      |
|                          | Selection Bias   | Random sequence generation             | Unclear Risk | Participants were age matched between groups. Method of sequence generation not reported.                                            |
|                          |                  | Allocation concealment                 | Unclear Risk | Not reported.                                                                                                                        |
| Petranyi et al. [106]    | Performance Bias | Blinding of participants and personnel | High Risk    | Impossible to blind participants and personnel due to nature of the trial ( <i>i.e.</i> supervised exercise sessions).               |

|                      |                  |                                        |              |                                                                                                                                                                                                          |
|----------------------|------------------|----------------------------------------|--------------|----------------------------------------------------------------------------------------------------------------------------------------------------------------------------------------------------------|
|                      | Detection Bias   | Blinding of outcome assessment         | High Risk    | Not reported.                                                                                                                                                                                            |
|                      | Attrition Bias   | Incomplete outcome data                | Low Risk     | Attrition not reported. 56 participants randomised and data present for all. No use of Consort (or similar) flow diagram.                                                                                |
|                      | Reporting Bias   | Selective reporting                    | Unclear Risk | Unable to locate prospectively published trial protocol.                                                                                                                                                 |
|                      | Other bias       | Group similarity at baseline           | Unclear Risk | Significance of baseline differences not reported. There appears to be some variation across outcomes.                                                                                                   |
|                      |                  | Adherence                              | Unclear Risk | Not reported.                                                                                                                                                                                            |
|                      |                  | Contamination                          | Unclear Risk | Physical activity in control group not reported                                                                                                                                                          |
|                      |                  |                                        |              |                                                                                                                                                                                                          |
| Roessler et al. [34] | Selection Bias   | Random sequence generation             | Unclear Risk | Participants were randomised but the method used to generate sequence is not reported.                                                                                                                   |
|                      |                  | Allocation concealment                 | Unclear Risk | Not reported.                                                                                                                                                                                            |
|                      | Performance Bias | Blinding of participants and personnel | High Risk    | Impossible to blind participants and personnel due to nature of the trial ( <i>i.e.</i> supervised exercise sessions).                                                                                   |
|                      | Detection Bias   | Blinding of outcome assessment         | High Risk    | Not reported.                                                                                                                                                                                            |
|                      | Attrition Bias   | Incomplete outcome data                | Low Risk     | Three participants did not complete – injury (not study related) and time concerns stated. Baseline data presented for all participants and separately for completers.                                   |
|                      | Reporting Bias   | Selective reporting                    | Unclear Risk | Unable to locate prospectively published trial protocol.                                                                                                                                                 |
|                      | Other bias       | Group similarity at baseline           | Low Risk     | No significant difference between groups for all outcomes reported.                                                                                                                                      |
|                      |                  | Adherence                              | High Risk    | Aerobic exercise adherence was 67%                                                                                                                                                                       |
|                      |                  | Contamination                          | High Risk    | This was a crossover design. Control group received group counselling sessions that explored motivation for, and barriers to PA. Exercise not stated but likely that behaviour may have been influenced. |
|                      |                  |                                        |              |                                                                                                                                                                                                          |
| Sa et al. [107-108]  | Selection Bias   | Random sequence generation             | High Risk    | Randomisation sequence computer generated but allocation to exercise group was partially based on ability to attend the 16 weeks of training, which was                                                  |

|                     |                  |                                        |              |                                                                                                                                                |
|---------------------|------------------|----------------------------------------|--------------|------------------------------------------------------------------------------------------------------------------------------------------------|
|                     |                  | Allocation concealment                 | High Risk    | limited for some participants (n = 5) due to their remote geographical location.                                                               |
|                     |                  |                                        |              | Five participants allocated to control group as they were unable to attend all sessions.                                                       |
|                     | Performance Bias | Blinding of participants and personnel | High Risk    | Impossible to blind participants and personnel due to nature of the trial ( <i>i.e.</i> supervised exercise sessions).                         |
|                     | Detection Bias   | Blinding of outcome assessment         | High Risk    | Not reported.                                                                                                                                  |
|                     | Attrition Bias   | Incomplete outcome data                | Low Risk     | Consort flow diagram used; 30 randomised and baseline data presented for all in initial study. Post-intervention data presented for completers |
|                     | Reporting Bias   | Selective reporting                    | High Risk    | Unable to locate prospectively published trial protocol. A range of baseline outcomes reported, but no post-intervention analysis completed.   |
|                     | Other bias       | Group similarity at baseline           | Low Risk     | No significant differences between groups at baseline.                                                                                         |
|                     |                  | Adherence                              | Unclear Risk | Not reported.                                                                                                                                  |
|                     |                  | Contamination                          | High Risk    | Five participants in the control group did not receive the allocated intervention due to living in a remote geographical location              |
| Saremi et al. [109] | Selection Bias   | Random sequence generation             | Unclear Risk | Quasi-randomisation. Methods used for sequence generation not reported.                                                                        |
|                     |                  | Allocation concealment                 | Unclear Risk | Not reported.                                                                                                                                  |
|                     | Performance Bias | Blinding of participants and personnel | High Risk    | Impossible to blind participants and personnel due to nature of the trial ( <i>i.e.</i> supervised exercise sessions).                         |
|                     | Detection Bias   | Blinding of outcome assessment         | High Risk    | Not reported.                                                                                                                                  |
|                     | Attrition Bias   | Incomplete outcome data                | Low Risk     | 22 randomised and all post-intervention data present. No evidence of Consort flow diagram.                                                     |
|                     | Reporting Bias   | Selective reporting                    | Unclear Risk | Unable to locate prospectively published trial protocol.                                                                                       |
|                     | Other bias       | Group similarity at baseline           | Unclear Risk | Significant differences not reported between groups. Some variability in data (HOMA-IR and lipid profile).                                     |

|                                            |                  |                                        |              |                                                                                                                                                                                                                                                                                                                         |
|--------------------------------------------|------------------|----------------------------------------|--------------|-------------------------------------------------------------------------------------------------------------------------------------------------------------------------------------------------------------------------------------------------------------------------------------------------------------------------|
| Saremi et al. [110]                        | Selection Bias   | Adherence                              | Unclear Risk | Not reported.                                                                                                                                                                                                                                                                                                           |
|                                            |                  | Contamination                          | Unclear Risk | Physical activity in control group not reported                                                                                                                                                                                                                                                                         |
|                                            |                  | Random sequence generation             | Unclear Risk | Method of randomisation and sequence generation not reported.                                                                                                                                                                                                                                                           |
|                                            | Performance Bias | Allocation concealment                 | Low Risk     | Investigators were blinded to group allocation prior to baseline testing.                                                                                                                                                                                                                                               |
|                                            |                  | Blinding of participants and personnel | High Risk    | Impossible to blind participants and personnel due to nature of the trial ( <i>i.e.</i> supervised exercise sessions). However, allocation of placebo and calcium supplement was blinded to participant.                                                                                                                |
|                                            |                  | Blinding of outcome assessment         | High Risk    | Not reported.                                                                                                                                                                                                                                                                                                           |
|                                            |                  | Incomplete outcome data                | Unclear Risk | Attrition not reported. Consort flow diagram not presented. Number of participants randomised unclear.                                                                                                                                                                                                                  |
|                                            |                  | Selective reporting                    | Unclear Risk | Unable to locate prospectively published trial protocol.                                                                                                                                                                                                                                                                |
|                                            | Other bias       | Group similarity at baseline           | Unclear Risk | Significant differences not reported between groups. Some variability in data (fasting insulin, blood glucose and lipid profile).                                                                                                                                                                                       |
|                                            |                  | Adherence                              | Unclear Risk | Not reported.                                                                                                                                                                                                                                                                                                           |
|                                            |                  | Contamination                          | Unclear Risk | Physical activity in control group not reported                                                                                                                                                                                                                                                                         |
| Stener-Victorin et al. [100, 102, 111-113] | Selection Bias   | Random sequence generation             | Low Risk     | Randomly allocated in a 2:2:1 ratio to low-frequency EA, physical exercise, or no active intervention. To ensure equal proportions of age and BMI in each study arm, randomisation was stratified by those variables. Computer-generated randomisation within each stratum was conducted using permuted blocks of five. |
|                                            |                  | Allocation concealment                 | Unclear Risk | Allocation was concealed until interventions were assigned. Methods used, not reported.                                                                                                                                                                                                                                 |
|                                            | Performance Bias | Blinding of participants and personnel | High Risk    | Impossible to blind participants and personnel due to nature of the trial ( <i>i.e.</i> supervised exercise sessions and EA).                                                                                                                                                                                           |
|                                            | Detection Bias   | Blinding of outcome                    | High Risk    | Not reported                                                                                                                                                                                                                                                                                                            |

|                              |                  |                                        |                                                                                                    |                                                                                                                                                                                                                            |
|------------------------------|------------------|----------------------------------------|----------------------------------------------------------------------------------------------------|----------------------------------------------------------------------------------------------------------------------------------------------------------------------------------------------------------------------------|
|                              |                  | assessment                             |                                                                                                    |                                                                                                                                                                                                                            |
|                              | Attrition Bias   | Incomplete outcome data                | High Risk                                                                                          | Attrition data reported throughout each stage of the study. Comparable dropout in each arm of study and appropriate reasons provided. However, 29% attrition from randomisation to post-intervention and 40% to follow-up. |
|                              | Reporting Bias   | Selective reporting                    | Low Risk                                                                                           | Trial preregistered on ClinicalTrials.gov (NCT00484705). 23 participants were recruited for microneurography; no criteria given for inclusion or detail on method of selection.                                            |
|                              | Other bias       | Group similarity at baseline           | Low Risk                                                                                           | No significant differences between groups for all outcomes.                                                                                                                                                                |
| Adherence                    |                  | Low Risk                               | Mean number of weekly sessions reported; ~3 per week in PA group.                                  |                                                                                                                                                                                                                            |
| Contamination                |                  | High Risk                              | There were no differences between the groups (PA, EA and control) in self-reports of PA frequency. |                                                                                                                                                                                                                            |
| Thomson et al. [33, 114-116] | Selection Bias   | Random sequence generation             | Low Risk                                                                                           | A parallel study design where subjects were randomly assigned by computer generation into three 20-wk lifestyle interventions.                                                                                             |
|                              |                  | Allocation concealment                 | Unclear Risk                                                                                       | Not reported                                                                                                                                                                                                               |
|                              | Performance Bias | Blinding of participants and personnel | High Risk                                                                                          | Impossible to blind participants and personnel due to nature of the trial ( <i>i.e.</i> supervised exercise sessions).                                                                                                     |
|                              | Detection Bias   | Blinding of outcome assessment         | High Risk                                                                                          | Not reported.                                                                                                                                                                                                              |
|                              | Attrition Bias   | Incomplete outcome data                | High Risk                                                                                          | Overview of reasons for dropout provided in study flow diagram but high rates reported – 49%                                                                                                                               |
|                              | Reporting Bias   | Selective reporting                    | Unclear Risk                                                                                       | Unable to locate prospectively published trial protocol.                                                                                                                                                                   |
|                              | Other bias       | Group similarity at baseline           | Low Risk                                                                                           | No significant differences between groups at baseline.                                                                                                                                                                     |
|                              |                  | Adherence                              | Unclear Risk                                                                                       | Not reported.                                                                                                                                                                                                              |
|                              |                  | Contamination                          | Unclear Risk                                                                                       | Physical activity in control group not reported                                                                                                                                                                            |
| Turan et al. [117]           | Selection Bias   | Random sequence                        | Low Risk                                                                                           | A computer generated random number table was used to                                                                                                                                                                       |

|                       |                  |                                        |                                                 |                                                                                                                                  |
|-----------------------|------------------|----------------------------------------|-------------------------------------------------|----------------------------------------------------------------------------------------------------------------------------------|
|                       |                  | generation                             |                                                 | generate sequence for allocation.                                                                                                |
|                       |                  | Allocation concealment                 | Low Risk                                        | Randomised following baseline testing. Allocation concealed using pre-labelled, sealed envelopes.                                |
|                       | Performance Bias | Blinding of participants and personnel | High Risk                                       | Impossible to blind participants and personnel due to nature of the trial (i.e. supervised exercise sessions).                   |
|                       | Detection Bias   | Blinding of outcome assessment         | High Risk                                       | Not reported.                                                                                                                    |
|                       | Attrition Bias   | Incomplete outcome data                | Low Risk                                        | Small attrition (n = 2) from exercise group due to non-attendance of exercise sessions.                                          |
|                       | Reporting Bias   | Selective reporting                    | Unclear Risk                                    | Unable to locate prospectively published trial protocol.                                                                         |
|                       | Other bias       | Group similarity at baseline           | Low Risk                                        | There were no significant differences between groups at baseline.                                                                |
|                       |                  | Adherence                              | Low Risk                                        | Two participants' data removed from analysis as adherence was < 75%                                                              |
| Contamination         |                  | Unclear Risk                           | Physical activity in control group not reported |                                                                                                                                  |
| Vigorito et al. [118] | Selection Bias   | Random sequence generation             | Unclear Risk                                    | Women were randomly subdivided into groups. Methods not reported.                                                                |
|                       |                  | Allocation concealment                 | Unclear Risk                                    | Not reported.                                                                                                                    |
|                       | Performance Bias | Blinding of participants and personnel | High Risk                                       | Impossible to blind participants and personnel due to nature of the trial (i.e. supervised exercise sessions).                   |
|                       | Detection Bias   | Blinding of outcome assessment         | Low Risk                                        | All clinical assessments were performed by the same physician who was blinded to the patient allocation into the study protocol. |
|                       | Attrition Bias   | Incomplete outcome data                | Low Risk                                        | All subjects completed the study protocol.                                                                                       |
|                       | Reporting Bias   | Selective reporting                    | Unclear Risk                                    | Unable to locate prospectively published trial protocol.                                                                         |
|                       | Other bias       | Group similarity at baseline           | Unclear Risk                                    | Significant differences at baseline not reported. Patients share similar characteristics across groups.                          |
|                       |                  | Adherence                              | Low Risk                                        | All participants completed the study protocol. Attendance was 100% in exercise group.                                            |
|                       |                  | Contamination                          | Low Risk                                        | Small decrease (-0.1 MET hr/wk) in LTPA for control group.                                                                       |

|                    |                  |                                        |              |                                                                                                                                                                                                                                                                                                                                   |
|--------------------|------------------|----------------------------------------|--------------|-----------------------------------------------------------------------------------------------------------------------------------------------------------------------------------------------------------------------------------------------------------------------------------------------------------------------------------|
| Vizza et al. [119] | Selection Bias   | Random sequence generation             | Low Risk     | Randomisation assignments were generated via an online randomisation programme.                                                                                                                                                                                                                                                   |
|                    |                  | Allocation concealment                 | Low Risk     | Randomisation done by an investigator not involved in the data collection and given to participants in sealed envelopes upon completion of baseline testing.                                                                                                                                                                      |
|                    | Performance Bias | Blinding of participants and personnel | High Risk    | Impossible to blind participants and personnel due to nature of the trial ( <i>i.e.</i> supervised exercise sessions).                                                                                                                                                                                                            |
|                    | Detection Bias   | Blinding of outcome assessment         | High Risk    | Clinical assessment completed by lead investigator - lead investigator also completed weekly status check with participants to monitor adverse events. Suggests no blinding.                                                                                                                                                      |
|                    | Attrition Bias   | Incomplete outcome data                | High Risk    | 15 participants randomised, 13% attrition across trial. Attrition detailed in results section and baseline data from non-completers used in results. Baseline data carried forward for two participants in the PRT and three in the control group that did not complete follow-up testing.                                        |
|                    | Reporting Bias   | Selective reporting                    | Unclear Risk | Unable to locate prospectively published trial protocol.                                                                                                                                                                                                                                                                          |
|                    | Other bias       | Group similarity at baseline           | High Risk    | Paper reports no significant difference between baseline characteristics of groups but does note trends in waist and hip circumference being higher in exercise group. Looking at the descriptive characteristics, mean body weight and BMI are considerably greater in the exercise group albeit with large standard deviations. |
|                    |                  | Adherence                              | High Risk    | Supervised training sessions have very good attendance (95%) but home-based component was only 51%.                                                                                                                                                                                                                               |
|                    |                  | Contamination                          | Unclear Risk | Physical activity in control group not reported                                                                                                                                                                                                                                                                                   |

BMI: body mass index; FMD: flow mediated dilation; HIT: high-intensity interval training; RT: resistance training; LH: luteinising hormone; FSH: follicle stimulating hormone; EN: exercise and nutrition; FI: fasting insulin; N: nutrition; PA: physical activity; HOMA-IR: homeostatic model assessment of insulin resistance index; EA: electroacupuncture; MET: metabolic equivalent of task; LTPA: leisure-time physical activity; PRT: progressive resistance training.

**Supplementary Table 3.** Details of excluded studies and reasons for exclusion.

| Study                      | Reason for Exclusion                                                                                                                             |
|----------------------------|--------------------------------------------------------------------------------------------------------------------------------------------------|
| Almenning et al. [36]      | Conference abstract; full study included in analysis                                                                                             |
| Asante et al. [37]         | Conference abstract; full study included in analysis                                                                                             |
| Bachani et al. [38]        | Comparison ineligible. Compares lifestyle modification with pharmacological intervention.                                                        |
| Barr et al. [39]           | Ineligible study design. No intervention applied                                                                                                 |
| Bongaard [40]              | Comparison ineligible. Compares a low-GI diet with a moderate- to high-GI diet                                                                   |
| Brown et al. [41]          | Conference abstract; full study included in analysis                                                                                             |
| Chizen et al. [42]         | Comparison ineligible. Compares a pulse diet with National Cholesterol Education Program Therapeutic Lifestyle Changes (TLC) Diet.               |
| Christiansen et al. [43]   | Ineligible patient population. Pregnant women.                                                                                                   |
| Crosignani et al. [44]     | Ineligible study design. Not a randomised controlled trial.                                                                                      |
| Curi et al. [45]           | Comparison ineligible. Compares lifestyle modification with pharmacological intervention.                                                        |
| Fux Otta et al. [46]       | Comparison ineligible. Compared lifestyle and pharmacological intervention with lifestyle and placebo.                                           |
| Galletly et al. [47]       | Comparison ineligible. Compares a low-protein high-carbohydrate diet with a high-protein low-carbohydrate diet.                                  |
| Gambineri et al. [48]      | Comparison ineligible. Compares a hypocaloric diet with placebo to a hypocaloric diet with pharmacological interventions.                        |
| Giallauria et al. [49]     | Ineligible study design. Patients not randomised.                                                                                                |
| Harris-Glocker et al. [50] | Ineligible comparison. Compares lifestyle modification and placebo with lifestyle modification and pharmacological intervention.                 |
| Hoeger et al. [51]         | Ineligible patient population. Adolescent patients were used in the trial.                                                                       |
| Jaffe et al. [52]          | Comparison ineligible. Compares high-carbohydrate low-fat diet and placebo with high-carbohydrate low-fat diet and pharmacological intervention. |
| Jedel et al. [53]          | Conference abstract; full study included in analysis                                                                                             |
| Johansson et al. [54]      | Ineligible comparison. Compares acupuncture to physical therapy.                                                                                 |
| Karimzadeh et al. [55]     | Comparison ineligible. Compares lifestyle to pharmacological interventions.                                                                      |
| Kumar et al. [56]          | Comparison ineligible. Compares lifestyle to lifestyle and pharmacological interventions.                                                        |
| Ladson et al. [57]         | Comparison ineligible. Compares lifestyle to lifestyle and pharmacological interventions.                                                        |
| Ladson et al. [58]         | Comparison ineligible. Compares lifestyle and placebo to lifestyle and pharmacological interventions.                                            |
| Le Donne et al. [59]       | Comparison ineligible. Compares diet with diet and pharmacological interventions.                                                                |
| Legro et al. [60]          | Comparison ineligible. Compares lifestyle with lifestyle and pharmacological interventions.                                                      |
| Legro et al. [61]          | Comparison ineligible. Compares lifestyle with lifestyle and pharmacological interventions.                                                      |

|                              |                                                                                                                                                                  |
|------------------------------|------------------------------------------------------------------------------------------------------------------------------------------------------------------|
| Liao et al. [62]             | Ineligible study design. Observational design.                                                                                                                   |
| Lindholm et al. [63]         | Comparison ineligible. Compares lifestyle and placebo to lifestyle and pharmacological interventions.                                                            |
| Ma et al. [64]               | Ineligible comparison. Compares weight loss treatment to weight loss treatment and pharmacological intervention.                                                 |
| Machlitt et al. [65]         | Ineligible comparison. Compares lifestyle and placebo with lifestyle and pharmacological intervention.                                                           |
| Marzouk et al. [66]          | Ineligible intervention. Intervention use dietary advice and caloric restriction.                                                                                |
| McBreairty et al. [67]       | Ineligible comparison. Compares pulse based diet and exercise with National Cholesterol Education Program therapeutic lifestyle changes (TLC) diet and exercise. |
| Mehrabani et al. [68]        | Ineligible intervention. Two hypocaloric diets are used for the intervention.                                                                                    |
| Moran et al. [69]            | Ineligible intervention. Low-protein and a high-protein hypocaloric diets are used as the intervention.                                                          |
| Moran et al. [70]            | Ineligible intervention. Meal replacement programme utilised; no comparison made.                                                                                |
| Moran et al. [71]            | Ineligible intervention. Two diets are utilised in the intervention.                                                                                             |
| Nidhi et al. [72]            | Ineligible patient population. Adolescent patients were used in the trial. Also compares two exercise modalities.                                                |
| Nidhi et al. [73]            | Ineligible patient population. Adolescent patients were used in the trial. Also compares two exercise modalities.                                                |
| Nidhi et al. [74]            | Ineligible patient population. Adolescent patients were used in the trial.                                                                                       |
| Nybacka et al. [75]          | Conference abstract; full study included in analysis                                                                                                             |
| Nybacka et al. [76]          | Conference abstract; full study included in analysis                                                                                                             |
| Omar et al. [77]             | Ineligible patient population. Compares women with PCOS to healthy controls.                                                                                     |
| Orio et al. [78]             | Ineligible comparison. Compares lifestyle to pharmacological interventions.                                                                                      |
| Ornstein et al. [79]         | Ineligible patient population. Adolescent patients were used in the trial.                                                                                       |
| Palomba et al. [80]          | Ineligible comparison. Compares lifestyle to lifestyle and pharmacological interventions.                                                                        |
| Palomba et al. [81]          | Ineligible study design. Non-randomised controlled trial.                                                                                                        |
| Papakonstantinou et al. [82] | Ineligible intervention. Compares two dietary interventions in a cross-over design.                                                                              |
| Pasquali et al. [83]         | Ineligible comparison. Compares hypocaloric diet with diet and pharmacological intervention.                                                                     |
| Pasquali et al. [84]         | Ineligible patient population. Compares hypocaloric diet with diet and pharmacological intervention.                                                             |
| Popova et al. [85]           | Ineligible comparison. Compares lifestyle with lifestyle and pharmacological interventions.                                                                      |
| Randeva et al. [86]          | Ineligible study design. Non-randomised controlled trial.                                                                                                        |
| Redman et al. [87]           | Ineligible patient population. Women with PCOS are compared to healthy controls.                                                                                 |
| Roessler et al. [88]         | Conference abstract; full study included in analysis                                                                                                             |
| Silva Dantas et al. [89]     | Ineligible patient population. Compares women with PCOS to healthy controls.                                                                                     |
| Sorensen et al. [90]         | Ineligible intervention. Either a high- or standard-protein diet are used for the intervention.                                                                  |
| Tang et al. [91]             | Ineligible comparison. Compares lifestyle and placebo with lifestyle and pharmacological intervention.                                                           |

|                             |                                                                 |
|-----------------------------|-----------------------------------------------------------------|
| Thomson et al. [92]         | Conference abstract; full study included in analysis            |
| Thomson et al. [93]         | Ineligible study design. No control group or comparison made.   |
| Turner-McGrievy et al. [94] | Ineligible study design. No lifestyle intervention              |
| Turner-McGrievy et al. [95] | Ineligible comparison. Compares vegan diet to low-calorie diet. |

**Supplementary Table 4.** Diagnostic criteria/definition applied for polycystic ovary syndrome (PCOS).

| PCOS Criteria                                                                                                                                                                                                                                          | NIH (1990)*                                             | Rotterdam ESHRE/ASRM<br>(2003)*                                 | AE-PCOS Society (2006)*                                                   |
|--------------------------------------------------------------------------------------------------------------------------------------------------------------------------------------------------------------------------------------------------------|---------------------------------------------------------|-----------------------------------------------------------------|---------------------------------------------------------------------------|
|                                                                                                                                                                                                                                                        | <i>Must have both of the findings<br/>marked below.</i> | <i>Must have at least two of the<br/>findings marked below.</i> | <i>Must have marked finding with<br/>either/or both of the other two.</i> |
| Hyperandrogenism (clinical or<br>biochemical findings)                                                                                                                                                                                                 | √                                                       | √                                                               | √                                                                         |
| Oligomenorrhea                                                                                                                                                                                                                                         | √                                                       | √                                                               |                                                                           |
| Polycystic Ovarian Morphology                                                                                                                                                                                                                          |                                                         | √                                                               |                                                                           |
| *In addition to the above criteria, PCOS diagnosis requires the exclusion of other androgen excess or related disorders, including: hyperprolactinaemia, thyroid dysfunction, adrenal hyperplasia, androgen secreting tumours, and Cushing's syndrome. |                                                         |                                                                 |                                                                           |

**Supplementary Table 5.** Summary of effect estimates and heterogeneity from sub-group analyses in blood pressure and metabolism-related outcomes.

| Outcome        | Sub-analysis             | Sub-group                 | Change from baseline |                                |                    | Post-intervention |                                |                    |
|----------------|--------------------------|---------------------------|----------------------|--------------------------------|--------------------|-------------------|--------------------------------|--------------------|
|                |                          |                           | Trials<br>(N)        | Effect Estimate MD<br>(95% CI) | I <sup>2</sup> (%) | Trials<br>(N)     | Effect Estimate MD<br>(95% CI) | I <sup>2</sup> (%) |
| SBP<br>(mmHg)  | BMI at entry             | ≤ 24.9 kg/m <sup>2</sup>  | 1 (30)               | -0.20 (-6.51 to 6.11)          | NA                 | 1 (30)            | 9.70 (4.35 to 15.05)           | NA                 |
|                |                          | 25-29.9 kg/m <sup>2</sup> | 2 (101)              | -1.80 (-8.53 to 4.93)          | 65                 | 2 (101)           | 0.19 (-12.94 to 13.31)         | 82                 |
|                |                          | ≥ 30 kg/m <sup>2</sup>    | 1 (27)               | -7.70 (-13.73 to -1.67)        | NA                 | 1 (27)            | -2.80 (-11.23 to 5.63)         | NA                 |
|                | Intervention<br>type     | Aerobic exercise          | 3 (128)              | -3.71 (-8.88 to 1.47)          | 60                 | 3 (128)           | -1.41 (-8.65 to 5.82)          | 65                 |
|                |                          | Combined exercise         | 1 (30)               | -0.20 (-6.51 to 6.11)          | NA                 | 1 (30)            | 9.70 (4.35 to 15.05)           | NA                 |
|                | Intervention<br>duration | ≤12 weeks                 | 2 (120)              | -3.03 (-7.54 to 1.47)          | 27                 | 2 (120)           | 1.90 (-13.19 to 16.99)         | 95                 |
|                |                          | >12 weeks                 | 2 (38)               | -2.91 (-12.41 to 6.60)         | 79                 | 2 (38)            | 2.06 (-8.29 to 12.41)          | 59                 |
|                | Delivery<br>format       | Supervised                | 3 (147)              | -4.42 (-8.32 to -0.51) *       | 31                 | 3 (147)           | 0.45 (-10.04 to 10.94)         | 90                 |
|                |                          | Unsupervised              | 1 (11)               | 2.00 (-4.39 to 8.39)           | NA                 | 1 (11)            | 7.80 (-2.54 to 18.14)          | NA                 |
| DBP<br>(mmHg)  | BMI at entry             | ≤ 24.9 kg/m <sup>2</sup>  | 1 (30)               | -0.20 (-7.23 to 6.83)          | NA                 | 1 (30)            | 4.50 (-1.43 to 10.43)          | NA                 |
|                |                          | 25-29.9 kg/m <sup>2</sup> | 2 (101)              | -1.19 (-3.11 to 0.73)          | 0                  | 2 (101)           | -1.31 (-3.09 to 0.47)          | 0                  |
|                |                          | ≥ 30 kg/m <sup>2</sup>    | 1 (27)               | -8.10 (-13.80 to -2.40)        | NA                 | 1 (27)            | -2.60 (-8.59 to 3.39)          | NA                 |
|                | Intervention<br>type     | Aerobic exercise          | 3 (128)              | -2.67 (-6.50 to 1.17)          | 62                 | 3 (128)           | -1.41 (-3.12 to 0.29)          | 0                  |
|                |                          | Combined exercise         | 1 (30)               | -0.20 (-7.23 to 6.83)          | NA                 | 1 (30)            | 4.50 (-1.43 to 10.43)          | NA                 |
|                | Intervention<br>duration | ≤12 weeks                 | 2 (120)              | -1.30 (-3.31 to 0.71)          | 0                  | 2 (120)           | 0.96 (-4.33 to 6.26)           | 68                 |
|                |                          | >12 weeks                 | 2 (38)               | -3.95 (-11.78 to 3.89)         | 77                 | 2 (38)            | -3.16 (-7.54 to 1.22)          | 0                  |
|                | Delivery<br>format       | Supervised                | 3 (147)              | -3.03 (-7.36 to 1.30)          | 60                 | 3 (147)           | -0.22 (-3.50 to 3.07)          | 43                 |
|                |                          | Unsupervised              | 1 (11)               | -0.10 (-4.90 to 4.70)          | NA                 | 1 (11)            | -3.80 (-10.22 to 2.62)         | NA                 |
| FBG<br>(mg/dL) | BMI at entry             | ≤ 24.9 kg/m <sup>2</sup>  | 1 (30)               | -4.00 (-8.94 to -0.94)         | NA                 | 1 (30)            | -3.70 (-10.08 to 2.68)         | NA                 |
|                |                          | 25-29.9 kg/m <sup>2</sup> | 5 (168)              | -0.79 (-2.08 to 0.50)          | 0                  | 5 (168)           | -1.59 (-5.29 to 2.11)          | 62                 |
|                |                          | ≥ 30 kg/m <sup>2</sup>    | 3 (65)               | -0.87 (-8.95 to 7.22)          | 58                 | 2 (40)            | -1.21 (-8.83 to 6.41)          | 0                  |
|                | Intervention<br>type     | Aerobic exercise          | 6 (192)              | -0.70 (-2.46 to 1.05)          | 21                 | 5 (167)           | -0.83 (-2.80 to 1.13)          | 0                  |
|                |                          | Resistance exercise       | 3 (50)               | -1.01 (-3.37 to 1.34)          | 11                 | 3 (50)            | -3.81 (-13.74 to 6.11)         | 76                 |
|                |                          | Combined exercise         | 1 (30)               | -4.00 (-8.94 to 0.94)          | NA                 | 1 (30)            | -3.70 (-10.08 to 2.68)         | NA                 |
|                | Intervention<br>duration | ≤12 weeks                 | 7 (225)              | -1.47 (-3.03 to 0.10)          | 18                 | 6 (200)           | -2.18 (-5.82 to 1.46)          | 53                 |
|                |                          | >12 weeks                 | 2 (38)               | 0.38 (-2.42 to 3.19)           | 0                  | 2 (38)            | -0.33 (-4.29 to 3.64)          | 0                  |
|                | Delivery                 | Supervised                | 6 (214)              | -1.75 (-4.06 to 0.56)          | 40                 | 5 (189)           | -3.04 (-7.59 to 1.52)          | 60                 |

|             |                       |                           |         |                            |    |         |                            |    |
|-------------|-----------------------|---------------------------|---------|----------------------------|----|---------|----------------------------|----|
|             | format                | Unsupervised              | 1 (11)  | 0.00 (-2.91 to 2.91)       | NA | 1 (11)  | 0.00 (-4.27 to 4.27)       | NA |
|             |                       | Mixed Delivery            | 2 (38)  | -0.73 (-3.05 to 1.58)      | 0  | 2 (38)  | 0.00 (-4.91 to 4.91)       | 0  |
| FI (μIU/mL) | BMI at entry          | ≤ 24.9 kg/m <sup>2</sup>  | 1 (30)  | -1.00 (-1.44 to 0.56)      | NA | 1 (30)  | -0.60 (-3.11 to 1.91)      | NA |
|             |                       | 25-29.9 kg/m <sup>2</sup> | 5 (168) | -3.25 (-5.27 to -1.22) **  | 75 | 5 (168) | -2.27 (-3.24 to -1.31) *** | 0  |
|             |                       | ≥ 30 kg/m <sup>2</sup>    | 3 (65)  | -1.94 (-3.94 to 0.06)      | 0  | 2 (40)  | 1.30 (-14.29 to 16.89)     | 88 |
|             | Intervention type     | Aerobic exercise          | 6 (192) | -2.22 (-3.57 to -0.86) *** | 10 | 5 (167) | -2.48 (-3.92 to -1.04) *** | 10 |
|             |                       | Resistance exercise       | 3 (50)  | -3.99 (-5.97 to -2.00) *** | 54 | 3 (50)  | -0.24 (-6.99 to 6.51)      | 68 |
|             |                       | Combined exercise         | 1 (30)  | -1.00 (-1.44 to -0.56)     | NA | 1 (30)  | -0.60 (-3.11 to 1.91)      | NA |
|             | Intervention duration | ≤12 weeks                 | 7 (225) | -2.92 (-4.91 to -0.93) **  | 93 | 6 (200) | -1.80 (-3.18 to -0.42) **  | 32 |
|             |                       | >12 weeks                 | 2 (38)  | 0.06 (-2.87 to 2.99)       | 0  | 2 (38)  | -3.63 (-8.11 to 0.85)      | 67 |
|             | Delivery format       | Supervised                | 6 (214) | -2.54 (-4.82 to -0.26) *   | 94 | 5 (189) | -2.39 (-3.62 to -1.17) *** | 30 |
|             |                       | Unsupervised              | 1 (11)  | -0.20 (-3.38 to 2.98)      | NA | 1 (11)  | -1.40 (-4.89 to 2.09)      | NA |
|             |                       | Mixed Delivery            | 2 (38)  | -3.08 (-5.63 to -0.53) *   | 17 | 2 (38)  | 3.54 (-8.29 to 15.37)      | 71 |
| HOMA-IR     | BMI at entry          | ≤ 24.9 kg/m <sup>2</sup>  | 1 (30)  | 0.20 (-0.53 to 0.93)       | NA | 1 (30)  | -0.20 (-0.75 to 0.35)      | NA |
|             |                       | 25-29.9 kg/m <sup>2</sup> | 4 (78)  | -0.83 (-1.39 to -0.26) **  | 75 | 4 (78)  | -0.51 (-1.10 to 0.07)      | 55 |
|             |                       | ≥ 30 kg/m <sup>2</sup>    | 3 (65)  | -0.43 (-1.19 to 0.32)      | 87 | 2 (40)  | 0.71 (-1.47 to 2.88)       | 55 |
|             | Intervention type     | Aerobic exercise          | 5 (102) | -0.73 (-1.24 to -0.21) **  | 60 | 4 (77)  | -0.15 (-0.70 to 0.40)      | 0  |
|             |                       | Resistance exercise       | 3 (50)  | -0.74 (-1.58 to 0.10)      | 94 | 3 (50)  | -0.24 (-1.89 to 1.41)      | 85 |
|             |                       | Combined exercise         | 1 (30)  | 0.20 (-0.53 to 0.93)       | NA | 1 (30)  | -0.20 (-0.75 to 0.35)      | NA |
|             | Intervention duration | ≤12 weeks                 | 6 (135) | -0.69 (-1.13 to -0.26) **  | 89 | 5 (110) | -0.14 (-0.88 to 0.59)      | 78 |
|             |                       | >12 weeks                 | 1 (11)  | 0.10 (-0.61 to 0.81)       | NA | 1 (11)  | -0.30 (-1.07 to 0.47)      | NA |
|             | Delivery format       | Supervised                | 5 (124) | -0.80 (-1.19 to -0.42) *** | 76 | 4 (99)  | -0.46 (-1.09 to 0.17)      | 66 |
|             |                       | Unsupervised              | 1 (11)  | 0.10 (-0.61 to 0.81)       | NA | 1 (11)  | -0.30 (-1.07 to 0.47)      | NA |
|             |                       | Mixed Delivery            | 2 (38)  | -0.55 (-1.60 to 0.50)      | 77 | 2 (38)  | 0.47 (-1.49 to 2.42)       | 66 |

Outcome: outcome where sub-analysis was completed. Sub-analysis: how the studies were categorised for analysis. Sub-group: groups each study was classified into. Trials: number of studies included within sub-analysis, *N*: number of participants included within sub-analysis. Effect estimates are reported as mean difference (MD), and 95% confidence intervals, between exercise and control groups. Significant evidence of effect denoted by: \*  $P \leq 0.05$ ; \*\*  $P \leq 0.01$ ; \*\*\*  $P \leq 0.001$ . Heterogeneity reported using  $I^2$  statistic: 0-40% might not be important; 30-60% may represent moderate heterogeneity; 50-90% may represent substantial heterogeneity; 75-100% may represent considerable heterogeneity. NA:  $I^2$  not applicable. SBP: systolic blood pressure; DBP: diastolic blood pressure; FBG: fasting blood glucose; FI: fasting insulin; BMI = body mass index.

**Supplementary Table 6.** Summary of effect estimates and heterogeneity from sub-group analyses in lipid related outcomes

| Outcome                  | Sub-analysis             | Sub-group                 | Change from baseline |                                |                       | Post-intervention |                                |                       |
|--------------------------|--------------------------|---------------------------|----------------------|--------------------------------|-----------------------|-------------------|--------------------------------|-----------------------|
|                          |                          |                           | Trials<br>(N)        | Effect Estimate MD<br>(95% CI) | I <sup>2</sup><br>(%) | Trials<br>(N)     | Effect Estimate MD<br>(95% CI) | I <sup>2</sup><br>(%) |
| Triglycerides<br>(mg/dL) | BMI at entry             | ≤ 24.9 kg/m <sup>2</sup>  | 1 (30)               | -4.20 (-6.87 to -1.53)         | NA                    | 1 (30)            | -2.30 (-6.34 to 1.74)          | NA                    |
|                          |                          | 25-29.9 kg/m <sup>2</sup> | 5 (168)              | -8.17 (-14.44 to -1.89) **     | 13                    | 5 (168)           | 3.04 (-4.97 to 11.05)          | 0                     |
|                          |                          | ≥ 30 kg/m <sup>2</sup>    | 1 (27)               | -5.04 (-16.10 to 6.02)         | NA                    | 1 (27)            | -14.95 (-28.74 to -1.16)       | NA                    |
|                          | Intervention<br>type     | Aerobic exercise          | 5 (167)              | -6.80 (-13.12 to -0.48) *      | 5                     | 5 (167)           | -2.89 (-14.44 to 8.65)         | 41                    |
|                          |                          | Resistance exercise       | 2 (37)               | -9.91 (-22.32 to 2.49)         | 0                     | 2 (37)            | 6.05 (-12.08 to 24.19)         | 0                     |
|                          |                          | Combined exercise         | 1 (30)               | -4.20 (-6.87 to -1.53)         | NA                    | 1 (30)            | -2.30 (-6.34 to 1.74)          | NA                    |
|                          | Intervention<br>duration | ≤12 weeks                 | 5 (187)              | -6.06 (-10.82 to -1.31) **     | 30                    | 5 (187)           | -1.10 (-4.73 to 2.54)          | 0                     |
|                          |                          | >12 weeks                 | 2 (38)               | -6.18 (-15.44 to 3.09)         | 0                     | 2 (38)            | -13.85 (-26.33 to -1.36) *     | 0                     |
|                          | Delivery<br>format       | Supervised                | 5 (189)              | -5.91 (-10.75 to -1.06) *      | 29                    | 5 (189)           | -2.49 (-6.77 to 1.79)          | 7                     |
|                          |                          | Unsupervised              | 1 (11)               | -8.85 (-25.81 to 8.11)         | NA                    | 1 (11)            | 8.85 (-38.22 to 20.52)         | NA                    |
|                          |                          | Mixed Delivery            | 1 (25)               | -6.20 (-16.12 to 3.73)         | NA                    | 1 (25)            | 20.36 (-5.87 to 46.58)         | NA                    |
| TC (mg/dL)               | BMI at entry             | ≤ 24.9 kg/m <sup>2</sup>  | 1 (30)               | -3.70 (-6.26 to -1.14)         | NA                    | 1 (30)            | -5.60 (-15.40 to 4.20)         | NA                    |
|                          |                          | 25-29.9 kg/m <sup>2</sup> | 5 (168)              | -6.30 (-12.81 to 0.21)         | 41                    | 5 (168)           | -4.16 (-10.31 to 2.00)         | 0                     |
|                          |                          | ≥ 30 kg/m <sup>2</sup>    | 1 (27)               | -12.08 (-24.34 to 0.18)        | NA                    | 1 (27)            | -10.81 (-19.04 to -2.58)       | NA                    |
|                          | Intervention<br>type     | Aerobic exercise          | 5 (167)              | -6.68 (-13.00 to -0.35) *      | 39                    | 5 (167)           | -6.90 (-11.90 to -1.90) **     | 0                     |
|                          |                          | Resistance exercise       | 2 (37)               | -9.72 (-21.67 to 2.22)         | 0                     | 2 (37)            | 6.47 (-16.70 to 29.63)         | 0                     |
|                          |                          | Combined exercise         | 1 (30)               | -3.70 (-6.26 to -1.14)         | NA                    | 1 (30)            | -5.60 (-15.40 to 4.20)         | NA                    |
|                          | Intervention<br>duration | ≤12 weeks                 | 5 (187)              | -5.94 (-10.32 to -1.55) **     | 37                    | 5 (187)           | -4.74 (-10.05 to 0.57)         | 0                     |
|                          |                          | >12 weeks                 | 2 (38)               | -4.78 (-20.35 to 10.80)        | 61                    | 2 (38)            | -9.92 (-17.81 to -2.04) **     | 0                     |
|                          | Delivery<br>format       | Supervised                | 5 (189)              | -7.25 (-11.92 to -2.58) **     | 48                    | 5 (189)           | -6.76 (-11.27 to -2.26) **     | 0                     |
|                          |                          | Unsupervised              | 1 (11)               | 3.87 (-11.38 to 19.12)         | NA                    | 1 (11)            | 0.00 (-27.50 to 27.50)         | NA                    |
|                          |                          | Mixed Delivery            | 1 (25)               | -0.01 (-14.95 to 14.93)        | NA                    | 1 (25)            | 5.80 (-26.26 to 37.86)         | NA                    |
| LDL-C<br>(mg/dL)         | BMI at entry             | ≤ 24.9 kg/m <sup>2</sup>  | 1 (30)               | -8.72 (-11.69 to -5.75)        | NA                    | 1 (30)            | -4.60 (-16.07 to 6.87)         | NA                    |
|                          |                          | 25-29.9 kg/m <sup>2</sup> | 5 (168)              | -3.41 (-8.05 to 1.24)          | 0                     | 5 (168)           | -9.54 (-18.71 to -0.36) *      | 22                    |
|                          |                          | ≥ 30 kg/m <sup>2</sup>    | 1 (27)               | -11.71 (-22.96 to -0.46)       | NA                    | 1 (27)            | -5.59 (-13.91 to 2.73)         | NA                    |
|                          | Intervention<br>type     | Aerobic exercise          | 5 (167)              | -4.17 (-9.23 to 0.90)          | 0                     | 5 (167)           | -5.87 (-11.68 to -0.07) *      | 0                     |
|                          |                          | Resistance exercise       | 2 (37)               | -6.50 (-16.32 to 3.32)         | 22                    | 2 (37)            | -13.57 (-38.44 to 11.29)       | 45                    |
|                          |                          | Combined exercise         | 1 (30)               | -8.72 (-11.69 to -5.75)        | NA                    | 1 (30)            | -4.60 (-16.07 to 6.87)         | NA                    |
|                          | Intervention             | ≤12 weeks                 | 5 (187)              | -6.60 (-9.88 to -3.32) ***     | 13                    | 5 (187)           | -8.64 (-16.30 to -0.98) *      | 22                    |

|                               |                          |                           |         |                             |    |         |                           |    |
|-------------------------------|--------------------------|---------------------------|---------|-----------------------------|----|---------|---------------------------|----|
|                               | duration                 | >12 weeks                 | 2 (38)  | -8.62 (-17.37 to 0.14)      | 0  | 2 (38)  | 5.05 (-12.97 to 2.86)     | 0  |
|                               | Delivery                 | Supervised                | 5 (187) | -6.70 (-10.29 to -3.12) *** | 23 | 5 (187) | -7.58 (-13.73 to -1.43) * | 24 |
|                               | format                   | Unsupervised              | 1 (11)  | -3.87 (-17.81 to 10.07)     | NA | 1 (11)  | 0.00 (-25.55 to 25.55)    | NA |
|                               |                          | Mixed Delivery            | 1 (25)  | -7.72 (-22.99 to 7.55)      | NA | 1 (25)  | -5.80 (-38.38 to 26.78)   | NA |
| HDL-C <sup>▲</sup><br>(mg/dL) | BMI at entry             | ≤ 24.9 kg/m <sup>2</sup>  | 1 (30)  | 0.60 (-0.40 to 1.60)        | NA | 1 (30)  | -0.90 (-3.19 to 1.39)     | NA |
|                               |                          | 25-29.9 kg/m <sup>2</sup> | 5 (168) | 0.99 (-2.89 to 4.88)        | 61 | 5 (168) | 3.36 (-3.33 to 10.05)     | 62 |
|                               |                          | ≥ 30 kg/m <sup>2</sup>    | 1 (27)  | 0.36 (-2.11 to 2.83)        | NA | 1 (27)  | 1.44 (-1.28 to 4.16)      | NA |
|                               | Intervention<br>type     | Aerobic exercise          | 5 (167) | 2.69 (-1.47 to 6.86)        | 59 | 5 (167) | 1.04 (-3.06 to 5.15)      | 29 |
|                               |                          | Resistance exercise       | 2 (37)  | -2.19 (-4.21 to -0.18) *    | 0  | 2 (37)  | 7.29 (1.11 to 13.46) *    | 17 |
|                               |                          | Combined exercise         | 1 (30)  | 0.60 (-0.40 to 1.60)        | NA | 1 (30)  | -0.90 (-3.19 to 1.39)     | NA |
|                               | Intervention<br>duration | ≤12 weeks                 | 5 (187) | -0.10 (-2.27 to 2.08)       | 57 | 5 (187) | 2.83 (-2.73 to 8.40)      | 76 |
|                               |                          | >12 weeks                 | 2 (38)  | 2.93 (-3.96 to 9.82)        | 64 | 2 (38)  | 1.25 (-1.42 to 3.92)      | 0  |
|                               | Delivery<br>format       | Supervised                | 5 (189) | -0.32 (-1.87 to 1.23)       | 45 | 5 (189) | 1.93 (-1.86 to 5.72)      | 75 |
|                               |                          | Unsupervised              | 1 (11)  | 7.74 (-0.61 to 16.09)       | NA | 1 (11)  | -3.86 (-17.97 to 10.25)   | NA |
|                               |                          | Mixed Delivery            | 1 (25)  | 4.25 (-1.43 to 9.93)        | NA | 1 (25)  | 7.74 (-7.42 to 22.90)     | NA |

Outcome: outcome where sub-analysis was completed. Sub-analysis: how the studies were categorised for analysis. Sub-group: groups each study was classified into. Trials: number of studies included within sub-analysis, *N*: number of participants included within sub-analysis. Effect estimates are reported as mean differences (MD), and 95% confidence intervals (CI), between exercise and control groups. <sup>▲</sup>: positive values favour exercise over control. Significant evidence of effect denoted by: \*  $P \leq 0.05$ ; \*\*  $P \leq 0.01$ ; \*\*\*  $P \leq 0.001$ . Heterogeneity reported using  $I^2$  statistic: 0-40% might not be important; 30-60% may represent moderate heterogeneity; 50-90% may represent substantial heterogeneity; 75-100% may represent considerable heterogeneity. NA:  $I^2$  not applicable. BMI: body mass index; TC: total cholesterol; LDL-C: low-density lipoprotein cholesterol; HDL-C: high-density lipoprotein cholesterol.

**Supplementary Table 7.** Summary of effect estimates and heterogeneity from sub-group analyses in cardiorespiratory, anthropometric and body composition related outcomes.

| Outcome                                                 | Sub-analysis             | Sub-group                 | Change from baseline    |                                |                       | Post-intervention       |                                |                       |
|---------------------------------------------------------|--------------------------|---------------------------|-------------------------|--------------------------------|-----------------------|-------------------------|--------------------------------|-----------------------|
|                                                         |                          |                           | Trials<br>(N)           | Effect Estimate MD<br>(95% CI) | I <sup>2</sup><br>(%) | Trials<br>(N)           | Effect Estimate MD<br>(95% CI) | I <sup>2</sup><br>(%) |
| VO <sub>2</sub><br>max/peak <sup>▲</sup><br>(ml/kg/min) | BMI at entry             | 25-29.9 kg/m <sup>2</sup> | 5 (202)                 | 3.39 (2.66 to 4.13) ***        | 0                     | 4 (157)                 | 4.70 (2.90 to 6.49) ***        | 51                    |
|                                                         |                          | ≥ 30 kg/m <sup>2</sup>    | 1 (27)                  | 5.70 (3.10 to 8.30)            | NA                    | 1 (27)                  | 6.90 (3.13 to 10.67)           | NA                    |
|                                                         | Intervention<br>type     | Aerobic exercise          | 6 (221)                 | 4.11 (3.07 to 5.14) ***        | 21                    | 5 (176)                 | 5.05 (3.53 to 6.56) ***        | 41                    |
|                                                         |                          | Resistance exercise       | 1 (17)                  | 1.70 (-1.16 to 4.56)           | NA                    | 1 (17)                  | 4.20 (-3.22 to 11.62)          | NA                    |
|                                                         | Intervention<br>duration | ≤12 weeks                 | 4 (157)                 | 3.35 (2.59 to 4.10) ***        | 0                     | 4 (157)                 | 4.70 (2.90 to 6.49) ***        | 51                    |
|                                                         |                          | >12 weeks                 | 2 (72)                  | 5.17 (3.11 to 7.23) ***        | 0                     | 1 (27)                  | 6.90 (3.13 to 10.67)           | NA                    |
| Delivery<br>format                                      | Supervised               | 4 (159)                   | 4.43 (2.76 to 6.10) *** | 47                             | 4 (159)               | 5.04 (3.25 to 6.82) *** | 56                             |                       |
|                                                         | Mixed Delivery           | 1 (25)                    | 3.10 (0.79 to 5.41)     | NA                             | 1 (25)                | 4.65 (-0.84 to 10.14)   | NA                             |                       |
| Resting Heart<br>Rate<br>(beats/min)                    | BMI at entry             | ≤ 24.9 kg/m <sup>2</sup>  | 1 (30)                  | -7.12 (-13.37 to -0.87)        | NA                    | 1 (30)                  | -6.90 (-13.88 to 0.08)         | NA                    |
|                                                         |                          | 25-29.9 kg/m <sup>2</sup> | 3 (126)                 | -1.76 (-4.41 to 0.89)          | 58                    | 3 (126)                 | -3.04 (-4.76 to -1.32) ***     | 10                    |
|                                                         | Intervention<br>type     | Aerobic exercise          | 3 (118)                 | -3.32 (-5.50 to -1.15) **      | 0                     | 3 (118)                 | -3.00 (-4.72 to -1.28) ***     | 0                     |
|                                                         |                          | Resistance exercise       | 1 (17)                  | 3.50 (-1.01 to 8.01)           | NA                    | 1 (17)                  | -0.10 (-9.16 to 8.96)          | NA                    |
|                                                         |                          | Combined exercise         | 1 (30)                  | -7.12 (-13.37 to -0.87)        | NA                    | 1 (30)                  | -6.90 (-13.88 to 0.08)         | NA                    |
|                                                         | Intervention<br>duration | ≤12 weeks                 | 3 (145)                 | -2.54 (-5.90 to 0.81)          | 66                    | 3 (145)                 | -3.18 (-5.59 to -0.77) **      | 16                    |
|                                                         |                          | >12 weeks                 | 1 (11)                  | -4.50 (-12.93 to 3.93)         | NA                    | 1 (11)                  | -5.70 (-20.72 to 9.32)         | NA                    |
|                                                         | Delivery<br>format       | Supervised                | 2 (120)                 | -4.06 (-7.42 to -0.70) *       | 26                    | 2 (120)                 | -3.53 (-5.28 to -1.78) ***     | 0                     |
|                                                         |                          | Unsupervised              | 1 (11)                  | -4.50 (-12.93 to 3.93)         | NA                    | 1 (11)                  | -5.70 (-20.72 to 9.32)         | NA                    |
|                                                         |                          | Mixed Delivery            | 1 (25)                  | 0.15 (-2.50 to 2.80)           | NA                    | 1 (25)                  | 0.30 (-5.72 to 6.32)           | NA                    |
| BMI (kg/m <sup>2</sup> )                                | BMI at entry             | ≤ 24.9 kg/m <sup>2</sup>  | 1 (30)                  | -0.14 (-1.23 to 0.95)          | NA                    | 1 (30)                  | -0.00 (-3.05 to 3.05)          | 0                     |
|                                                         |                          | 25-29.9 kg/m <sup>2</sup> | 6 (222)                 | -0.01 (-0.47 to 0.45)          | 30                    | 6 (188)                 | -1.04 (-1.89 to -0.19) *       | 0                     |
|                                                         |                          | ≥ 30 kg/m <sup>2</sup>    | 4 (79)                  | -1.34 (-1.86 to -0.82) ***     | 0                     | 3 (54)                  | -0.70 (-5.55 to 4.15)          | 38                    |
|                                                         | Intervention<br>type     | Aerobic exercise          | 8 (260)                 | -0.78 (-1.38 to -0.18) **      | 57                    | 7 (201)                 | -1.45 (-2.59 to -0.32) **      | 0                     |
|                                                         |                          | Resistance exercise       | 3 (50)                  | 0.50 (0.00 to 1.00) *          | 0                     | 3 (50)                  | -0.10 (-2.76 to 2.55)          | 23                    |
|                                                         |                          | Combined exercise         | 1 (30)                  | -0.14 (-1.23 to 0.95)          | NA                    | 1 (30)                  | 0.00 (-3.05 to 3.05)           | NA                    |
|                                                         | Intervention<br>duration | ≤12 weeks                 | 8 (245)                 | -0.43 (-1.22 to 0.35)          | 64                    | 7 (220)                 | -0.91 (-1.73 to -0.08) *       | 0                     |
|                                                         |                          | >12 weeks                 | 3 (86)                  | -0.61 (-1.61 to 0.38)          | 77                    | 3 (52)                  | -2.42 (-5.28 to 0.45)          | 0                     |
|                                                         | Delivery                 | Supervised                | 8 (248)                 | -0.65 (-1.42 to 0.12)          | 74                    | 7 (223)                 | -1.06 (-1.87 to -0.25) **      | 0                     |

|                                |                          |                           |         |                            |    |         |                            |    |
|--------------------------------|--------------------------|---------------------------|---------|----------------------------|----|---------|----------------------------|----|
|                                | format                   | Unsupervised              | 1 (45)  | -0.10 (-0.51 to 0.31)      | NA | 1 (11)  | -2.10 (-8.60 to 4.40)      | NA |
|                                |                          | Mixed Delivery            | 2 (38)  | 0.19 (-1.56 to 1.93)       | 0  | 2 (38)  | 1.82 (-5.85 to 9.50)       | 45 |
| Body Mass<br>(kg)              | BMI at entry             | ≤ 24.9 kg/m <sup>2</sup>  | 1 (20)  | 0.60 (-2.07 to 3.27)       | NA | 1 (20)  | -1.60 (-7.40 to 4.20)      | NA |
|                                |                          | 25-29.9 kg/m <sup>2</sup> | 3 (67)  | -0.40 (-3.02 to 2.21)      | 0  | 3 (67)  | -0.55 (-7.88 to 6.78)      | 0  |
|                                |                          | ≥ 30 kg/m <sup>2</sup>    | 3 (52)  | -4.07 (-6.46 to -1.67) *** | 0  | 2 (27)  | 13.88 (-16.21 to 43.97)    | 61 |
|                                |                          |                           |         |                            |    |         |                            |    |
|                                | Intervention<br>type     | Aerobic exercise          | 5 (98)  | -1.88 (-4.08 to 0.32)      | 38 | 4 (73)  | -1.54 (-8.26 to 5.17)      | 0  |
|                                |                          | Resistance exercise       | 3 (50)  | 0.62 (-1.27 to 2.51)       | 0  | 3 (50)  | 3.99 (-9.39 to 17.36)      | 50 |
|                                | Intervention<br>duration | ≤12 weeks                 | 6 (125) | -1.23 (-3.45 to 0.98)      | 44 | 5 (100) | -0.59 (-5.10 to 3.92)      | 0  |
|                                |                          | >12 weeks                 | 1 (14)  | -0.70 (-10.81 to 9.41)     | NA | 1 (14)  | 1.49 (-24.92 to 27.90)     | NA |
| Waist<br>Circumference<br>(cm) | Delivery<br>format       | Supervised                | 5 (101) | -1.61 (-4.21 to 0.99)      | 49 | 4 (76)  | -1.00 (-5.72 to 3.72)      | 0  |
|                                |                          | Mixed Delivery            | 2 (38)  | 0.26 (-3.22 to 3.74)       | 0  | 2 (38)  | 11.85 (-21.86 to 45.56)    | 71 |
|                                |                          |                           |         |                            |    |         |                            |    |
|                                |                          |                           |         |                            |    |         |                            |    |
|                                | BMI at entry             | ≤ 24.9 kg/m <sup>2</sup>  | 1 (30)  | -1.40 (-2.21 to -0.59)     | NA | 1 (30)  | -1.00 (-9.68 to 7.68)      | NA |
|                                |                          | 25-29.9 kg/m <sup>2</sup> | 3 (137) | -2.21 (-4.25 to -0.16) *   | 0  | 3 (137) | -2.02 (-3.39 to -0.65) **  | 0  |
|                                |                          | ≥ 30 kg/m <sup>2</sup>    | 3 (54)  | -4.18 (-7.86 to -0.50) *   | 62 | 3 (54)  | 1.38 (-14.27 to 17.04)     | 69 |
|                                |                          |                           |         |                            |    |         |                            |    |
| Body Fat (%)                   | Intervention<br>type     | Aerobic exercise          | 5 (170) | -3.30 (-6.10 to -0.51) *   | 50 | 5 (170) | -2.22 (-3.56 to -0.87) *** | 0  |
|                                |                          | Resistance exercise       | 2 (30)  | -2.40 (-4.04 to -0.75) **  | 0  | 2 (30)  | 10.31 (-13.73 to 34.35)    | 62 |
|                                |                          | Combined exercise         | 1 (30)  | -1.40 (-2.21 to -0.59)     | NA | 1 (30)  | -1.00 (-9.68 to 7.68)      | NA |
|                                |                          |                           |         |                            |    |         |                            |    |
|                                | Intervention<br>duration | ≤12 weeks                 | 5 (180) | -1.69 (-2.38 to -0.99) *** | 0  | 5 (180) | -1.73 (-4.25 to 0.78)      | 8  |
|                                |                          | >12 weeks                 | 2 (41)  | -5.19 (-11.43 to 1.05)     | 52 | 2 (41)  | -6.86 (-14.02 to 0.30)     | 0  |
|                                | Delivery<br>format       | Supervised                | 5 (183) | -3.21 (-5.56 to -0.85) **  | 64 | 5 (183) | -2.16 (-3.50 to -0.82) **  | 0  |
|                                |                          | Mixed Delivery            | 2 (38)  | -2.09 (-4.36 to 0.19)      | 28 | 2 (38)  | 8.80 (-17.70 to 35.29)     | 72 |
| Body Fat (%)                   | BMI at entry             | 25-29.9 kg/m <sup>2</sup> | 2 (47)  | -1.60 (-3.68 to 0.47)      | 59 | 2 (47)  | -4.51 (-8.10 to -0.92) **  | 0  |
|                                |                          | ≥ 30 kg/m <sup>2</sup>    | 1 (13)  | -1.00 (-2.56 to 0.56)      | NA | 1 (13)  | 3.50 (-7.08 to 14.08)      | NA |
|                                |                          |                           |         |                            |    |         |                            |    |
|                                |                          |                           |         |                            |    |         |                            |    |
|                                | Intervention<br>type     | Aerobic exercise          | 2 (39)  | -1.36 (-3.73 to 1.01)      | 76 | 2 (39)  | -4.99 (-8.73 to -1.25) **  | 0  |
|                                |                          | Resistance exercise       | 2 (30)  | -0.95 (-2.02 to 0.13)      | 0  | 2 (30)  | 0.47 (-5.95 to 6.88)       | 0  |
| Body Fat (%)                   | Delivery<br>format       | Supervised                | 1 (22)  | -2.62 (-4.39 to -0.85)     | NA | 1 (22)  | -5.48 (-9.83 to -1.13)     | NA |
|                                |                          | Mixed Delivery            | 2 (38)  | -0.81 (-2.03 to 0.42)      | 0  | 2 (38)  | -0.88 (-6.32 to 4.56)      | 0  |

Outcome: outcome where sub-analysis was completed. Sub-analysis: how the studies were categorised for analysis. Sub-group: groups each study was classified into. Trials: number of studies included within sub-analysis, *N*: number of participants included within sub-analysis. Effect estimates are reported as mean differences, and 95% confidence intervals, between exercise and control groups. ▲: positive values favour exercise over control. Significant evidence of effect denoted by: \*  $P \leq 0.05$ ; \*\*  $P \leq 0.01$ ; \*\*\*  $P \leq 0.001$ . Heterogeneity reported using  $I^2$  statistic: 0-40% might not be important; 30-60% may represent moderate heterogeneity; 50-90% may represent substantial heterogeneity; 75-100% may represent considerable heterogeneity. NA:  $I^2$  not applicable. VO<sub>2</sub> max/peak: maximum or peak relative volume of oxygen consumed; BMI: body mass index; LDL-C: low-density lipoprotein cholesterol; HDL-C: high-density lipoprotein cholesterol.

**Supplementary Table 8.** Summary of effect estimates and heterogeneity from sub-group analyses in androgenic and inflammatory outcomes.

| Outcome                           | Sub-analysis             | Sub-group                 | Change from baseline      |                                |                       | Post-intervention    |                                |                       |
|-----------------------------------|--------------------------|---------------------------|---------------------------|--------------------------------|-----------------------|----------------------|--------------------------------|-----------------------|
|                                   |                          |                           | Trials<br>(N)             | Effect Estimate MD<br>(95% CI) | I <sup>2</sup><br>(%) | Trials<br>(N)        | Effect Estimate MD<br>(95% CI) | I <sup>2</sup><br>(%) |
| Total<br>Testosterone<br>(nmol/L) | BMI at entry             | ≤ 24.9 kg/m <sup>2</sup>  | 1 (30)                    | -0.10 (-2.04 to 1.84)          | NA                    | 1 (30)               | -0.10 (-1.91 to 1.71)          | NA                    |
|                                   |                          | 25-29.9 kg/m <sup>2</sup> | 3 (160)                   | -0.11 (-0.27 to 0.05)          | 0                     | 3 (126)              | -0.03 (-0.46 to 0.41)          | 68                    |
|                                   |                          | ≥ 30 kg/m <sup>2</sup>    | 1 (13)                    | 0.10 (-0.33 to 0.53)           | NA                    | 1 (13)               | -0.10 (-0.54 to 0.34)          | NA                    |
|                                   | Intervention<br>type     | Aerobic exercise          | 3 (152)                   | -0.10 (-0.27 to 0.06)          | 0                     | 3 (118)              | -0.03 (-0.48 to 0.43)          | 60                    |
|                                   |                          | Resistance exercise       | 2 (30)                    | -0.00 (-0.30 to 0.30)          | 0                     | 2 (30)               | 0.04 (-0.29 to 0.36)           | 0                     |
|                                   |                          | Combined exercise         | 1 (30)                    | -0.10 (-2.04 to 1.84)          | NA                    | 1 (30)               | -0.10 (-1.91 to 1.71)          | NA                    |
|                                   | Intervention<br>duration | ≤12 weeks                 | 4 (158)                   | -0.02 (-0.23 to 0.19)          | 0                     | 4 (158)              | -0.08 (-0.40 to 0.25)          | 50                    |
|                                   |                          | >12 weeks                 | 1 (45)                    | -0.16 (-0.37 to 0.06)          | NA                    | 1 (11)               | 0.00 (-0.62 to 0.62)           | NA                    |
|                                   | Delivery<br>format       | Supervised                | 2 (120)                   | -0.10 (-0.41 to 0.21)          | 0                     | 2 (120)              | -0.30 (-0.51 to -0.09)         | 0                     |
|                                   |                          | Unsupervised              | 1 (45)                    | -0.16 (-0.37 to 0.06)          | NA                    | 1 (11)               | 0.00 (-0.62 to 0.62)           | NA                    |
|                                   |                          | Mixed Delivery            | 2 (38)                    | 0.04 (-0.24 to 0.32)           | 0                     | 2 (38)               | 0.11 (-0.33 to 0.55)           | 45                    |
| SHBG<br>(nmol/L)                  | BMI at entry             | 25-29.9 kg/m <sup>2</sup> | 3 (160)                   | 11.16 (-8.39 to 30.71)         | 92                    | 3 (126)              | 14.99 (-18.49 to 48.47)        | 0                     |
|                                   |                          | ≥ 30 kg/m <sup>2</sup>    | 1 (13)                    | -5.00 (-20.66 to 10.66)        | NA                    | 1 (13)               | -20.00 (-45.80 to 5.80)        | NA                    |
|                                   | Intervention<br>type     | Aerobic exercise          | 3 (152)                   | 9.49 (-13.77 to 32.76)         | 92                    | 3 (118)              | 18.97 (-23.25 to 61.19)        | 69                    |
|                                   |                          | Resistance exercise       | 2 (30)                    | 4.98 (-14.52 to 24.49)         | 68                    | 2 (30)               | -0.79 (-45.26 to 43.67)        | 67                    |
|                                   | Intervention<br>duration | ≤12 weeks                 | 3 (128)                   | 2.45 (-1.04 to 5.93)           | 0                     | 3 (128)              | -0.81 (-8.06 to 6.45)          | 22                    |
|                                   |                          | >12 weeks                 | 1 (45)                    | 30.31 (20.15 to 40.47)         | NA                    | 1 (11)               | -3.10 (-57.82 to 51.62)        | NA                    |
|                                   | Delivery<br>format       | Supervised                | 1 (90)                    | 3.00 (-0.65 to 6.65)           | NA                    | 1 (90)               | 1.00 (-1.63 to 3.63)           | NA                    |
|                                   |                          | Unsupervised              | 1 (45)                    | 30.31 (20.15 to 40.47)         | NA                    | 1 (11)               | -3.10 (-57.82 to 51.62)        | NA                    |
|                                   |                          | Mixed Delivery            | 2 (38)                    | -3.23 (-14.91 to 8.46)         | 0                     | 2 (38)               | 4.51 (-56.46 to 85.47)         | 89                    |
|                                   | Free Androgen<br>Index   | BMI at entry              | 25-29.9 kg/m <sup>2</sup> | 3 (126)                        | 0.09 (-0.78 to 0.96)  | 0                    | 3 (126)                        | 0.06 (-1.13 to 1.26)  |
| ≥ 30 kg/m <sup>2</sup>            |                          |                           | 1 (13)                    | 1.00 (-0.91 to 2.91)           | NA                    | 1 (13)               | 5.10 (-0.25 to 10.45)          | NA                    |
| Intervention<br>type              |                          | Aerobic exercise          | 3 (118)                   | 0.51 (-0.52 to 1.53)           | 0                     | 3 (118)              | 0.10 (-1.17 to 1.36)           | 10                    |
|                                   |                          | Resistance exercise       | 2 (30)                    | -0.04 (-1.67 to 1.58)          | 57                    | 2 (30)               | 1.71 (-3.65 to 7.08)           | 74                    |
| Intervention<br>duration          |                          | ≤12 weeks                 | 3 (128)                   | 0.11 (-0.71 to 0.93)           | 0                     | 3 (128)              | 0.34 (-1.45 to 2.13)           | 50                    |
|                                   |                          | >12 weeks                 | 1 (11)                    | 2.10 (-0.92 to 5.12)           | NA                    | 1 (11)               | 3.40 (-1.67 to 8.47)           | NA                    |
| Delivery<br>format                |                          | Supervised                | 1 (90)                    | 0.20 (-1.23 to 1.63)           | NA                    | 1 (90)               | -0.20 (-1.23 to 1.63)          | NA                    |
|                                   |                          | Unsupervised              | 1 (11)                    | 2.10 (-0.92 to 5.12)           | NA                    | 1 (11)               | 3.40 (-1.67 to 8.47)           | NA                    |
|                                   | Mixed Delivery           | 2 (38)                    | 1.79 (-3.18 to 6.76)      | 72                             | 2 (38)                | 1.67 (-3.80 to 7.14) | 75                             |                       |

|                                              |                          |                           |         |                           |    |         |                         |    |
|----------------------------------------------|--------------------------|---------------------------|---------|---------------------------|----|---------|-------------------------|----|
| Oestradiol<br>(pmol/L)                       | BMI at entry             | ≤ 24.9 kg/m <sup>2</sup>  | 1 (30)  | 27.28 (-8.98 to 63.54)    | NA | 1 (30)  | 6.70 (-21.73 to 35.13)  | NA |
|                                              |                          | 25-29.9 kg/m <sup>2</sup> | 2 (135) | -41.14 (-141.68 to 59.40) | 70 | 1 (90)  | -1.00 (-13.62 to 11.62) | NA |
|                                              |                          | ≥ 30 kg/m <sup>2</sup>    | 1 (25)  | -77.09 (-166.91 to 12.73) | NA | -       | -                       | -  |
|                                              | Intervention<br>type     | Aerobic exercise          | 3 (160) | -47.22 (-117.52 to 23.08) | 65 | 1 (90)  | -1.00 (-13.62 to 11.62) | NA |
|                                              |                          | Combined exercise         | 1 (30)  | 27.28 (-8.98 to 63.54)    | NA | 1 (30)  | 6.70 (-21.73 to 35.13)  | NA |
|                                              | Intervention<br>duration | ≤12 weeks                 | 3 (145) | -1.14 (-36.61 to 34.33)   | 61 | 2 (120) | 0.27 (-11.27 to 11.80)  | 0  |
|                                              |                          | >12 weeks                 | 1 (45)  | -110.13 (-224.10 to 3.84) | NA | -       | -                       | -  |
|                                              | Delivery<br>format       | Supervised                | 3 (145) | -1.14 (-36.61 to 34.33)   | 61 | 2 (120) | 0.27 (-11.27 to 11.80)  | 0  |
|                                              |                          | Unsupervised              | 1 (45)  | -110.13 (-224.10 to 3.84) | NA | -       | -                       | -  |
| Luteinising<br>Hormone<br>(IU/L)             | BMI at entry             | ≤ 24.9 kg/m <sup>2</sup>  | 1 (30)  | 1.60 (-0.17 to 3.37)      | NA | 1 (30)  | -3.60 (-7.47 to 0.27)   | NA |
|                                              |                          | 25-29.9 kg/m <sup>2</sup> | 3 (155) | -1.12 (-3.63 to 1.39)     | 61 | 3 (121) | 0.15 (-0.92 to 1.22)    | 0  |
|                                              | Intervention<br>type     | Aerobic exercise          | 3 (155) | -1.12 (-3.63 to 1.39)     | 61 | 3 (121) | 0.15 (-0.92 to 1.22)    | 0  |
|                                              |                          | Combined exercise         | 1 (30)  | 1.60 (-0.17 to 3.37)      | NA | 1 (30)  | -3.60 (-7.47 to 0.27)   | NA |
|                                              | Intervention<br>duration | ≤12 weeks                 | 3 (140) | -0.59 (-3.24 to 2.06)     | 81 | 3 (140) | -1.60 (-4.73 to 1.54)   | 62 |
|                                              |                          | >12 weeks                 | 1 (45)  | 1.18 (-3.15 to 5.51)      | NA | 1 (11)  | 0.00 (-2.20 to 2.20)    | NA |
|                                              | Delivery<br>format       | Supervised                | 3 (140) | -0.59 (-3.24 to 2.06)     | 81 | 3 (140) | -1.60 (-4.73 to 1.54)   | 62 |
|                                              |                          | Unsupervised              | 1 (45)  | 1.18 (-3.15 to 5.51)      | NA | 1 (11)  | 0.00 (-2.20 to 2.20)    | NA |
| Follicle<br>Stimulating<br>Hormone<br>(IU/L) | BMI at entry             | ≤ 24.9 kg/m <sup>2</sup>  | 1 (30)  | 0.36 (-0.06 to 0.78)      | NA | 1 (30)  | -0.30 (-1.01 to 0.41)   | NA |
|                                              |                          | 25-29.9 kg/m <sup>2</sup> | 3 (155) | 0.09 (-0.35 to 0.52)      | 0  | 3 (121) | 0.11 (-0.35 to 0.56)    | 0  |
|                                              | Intervention<br>type     | Aerobic exercise          | 3 (155) | 0.09 (-0.35 to 0.52)      | 0  | 3 (121) | 0.11 (-0.35 to 0.56)    | 0  |
|                                              |                          | Combined exercise         | 1 (30)  | 0.36 (-0.06 to 0.78)      | NA | 1 (30)  | -0.30 (-1.01 to 0.41)   | NA |
|                                              | Intervention<br>duration | ≤12 weeks                 | 3 (140) | 0.19 (-0.13 to 0.51)      | 0  | 3 (140) | -0.03 (-0.42 to 0.37)   | 0  |
|                                              |                          | >12 weeks                 | 1 (45)  | 0.57 (-0.44 to 1.58)      | NA | 1 (11)  | 0.20 (-1.34 to .74)     | NA |
|                                              | Delivery<br>format       | Supervised                | 3 (140) | 0.19 (-0.13 to 0.51)      | 0  | 3 (140) | -0.03 (-0.42 to 0.37)   | 0  |
|                                              |                          | Unsupervised              | 1 (45)  | 0.57 (-0.44 to 1.58)      | NA | 1 (11)  | 0.20 (-1.34 to .74)     | NA |

Outcome: outcome where sub-analysis was completed. Sub-analysis: how the studies were categorised for analysis. Sub-group: groups each study was classified into. Trials: number of studies included within sub-analysis, N: number of participants included within sub-analysis. Effect estimates are reported as mean differences (MD), and 95% confidence intervals (CI), between exercise and control groups. Heterogeneity reported using I<sup>2</sup> statistic: 0-40% might not be important; 30-60% may represent moderate heterogeneity; 50-90% may represent substantial heterogeneity; 75-100% may represent considerable heterogeneity. NA: I<sup>2</sup> not applicable. BMI: body mass index; SHBG: sex hormone-binding globulin.

**Supplementary Table 9.** Exercise versus Control: Summary of findings from investigative outcomes that were only reported in single trials.

| Trial                        | Significance                          | Outcomes                                                                                                                                                                                                                                                                                                                                                                                                                                                                                                                                    |
|------------------------------|---------------------------------------|---------------------------------------------------------------------------------------------------------------------------------------------------------------------------------------------------------------------------------------------------------------------------------------------------------------------------------------------------------------------------------------------------------------------------------------------------------------------------------------------------------------------------------------------|
| Almenning et al. [32]        | No statistically significant findings | HR recovery; Leptin                                                                                                                                                                                                                                                                                                                                                                                                                                                                                                                         |
|                              | Statistically significant findings    | <ul style="list-style-type: none"> <li>Nitric oxide bio-availability [as measured by flow mediated dilation (FMD) %] - reported a statistically significant improvement in FMD following a HIT intervention, but not resistance training.</li> <li>Homocysteine – significant change from baseline concentrations (MD: -0.6 <math>\mu\text{mol/L}</math>, 95% CI: -1.0 to -0.1) following a HIT intervention but no between group differences.</li> </ul>                                                                                   |
| Sa et al. [107]              | No statistically significant findings | Area under the curve (AUC) oral glucose tolerance test; two-hour post-prandial blood glucose; interleukin-6; tumour necrosis- $\alpha$                                                                                                                                                                                                                                                                                                                                                                                                      |
|                              | Statistically significant findings    | <ul style="list-style-type: none"> <li>Mean arterial blood pressure; a statistical reduction in the exercise group (MD: -6.8 mmHg, 95% CI: -10.6 to -3.0; 14 participants) and a significant time by group interaction, representative of a moderate effect size (<math>d</math>) was also reported (<math>d</math>: -1.0; 95% CI: -1.7 to -0.3)</li> </ul>                                                                                                                                                                                 |
| Stener-Victorin et al. [111] | No statistically significant findings | Number of participants with acne; menstrual frequency; 5 $\alpha$ -dihydrotestosterone; estrone; DHEA; androstenedione; 5-androstene-3 $\beta$ , 17 $\beta$ -diol, androsterone glucuronide; androstane-3 $\alpha$ , 17 $\beta$ -diol-3 glucuronide; 17 $\beta$ -diol-17 glucuronide; insulin growth factor-1; thyroid stimulating hormone; free thyroxin 4; fibrinogen; fibrin D-dimer; von Willebrand factor; factor VIII; tissue plasminogen activator and plasminogen activator inhibitor; ovarian volume; Montgomery Asberg Depression |

|                              |                                       |                                                                                                                                                                                                                                                                                                                                                                                                                                                                                                                                                                                                                                                                                                                                                                                        |
|------------------------------|---------------------------------------|----------------------------------------------------------------------------------------------------------------------------------------------------------------------------------------------------------------------------------------------------------------------------------------------------------------------------------------------------------------------------------------------------------------------------------------------------------------------------------------------------------------------------------------------------------------------------------------------------------------------------------------------------------------------------------------------------------------------------------------------------------------------------------------|
|                              |                                       | Rating Scale (MADRS) and the Brief Scale for Anxiety (BSA)                                                                                                                                                                                                                                                                                                                                                                                                                                                                                                                                                                                                                                                                                                                             |
|                              | Statistically significant findings    | <ul style="list-style-type: none"> <li>• Estrone sulfate (E1-S) - significantly lower (<math>P &lt; .05</math>) in the exercise group versus control when measured immediately post-intervention; this effect disappeared during follow-up assessment.</li> <li>• Median antral follicle counts - were significantly lower (-11.7%; <math>P = .010</math>) from baseline to follow-up in the exercise group.</li> </ul>                                                                                                                                                                                                                                                                                                                                                                |
| <b>Turan [117]</b>           | Statistically significant findings    | <ul style="list-style-type: none"> <li>• Respiratory rate – significant within exercise group changes in respiratory rate (<math>-1.0 \pm 0.4</math> breaths/minute) following exercise, but not between differences of groups.</li> <li>• Hip circumference - a statistically significant (<math>P &lt; .05</math>) reduction following exercise training, and a statistical difference (<math>P &lt; .05</math>) between change scores in each arm</li> </ul>                                                                                                                                                                                                                                                                                                                        |
| <b>Vigorito et al. [118]</b> | No statistically significant findings | Respiratory exchange ratio; Peak HR                                                                                                                                                                                                                                                                                                                                                                                                                                                                                                                                                                                                                                                                                                                                                    |
|                              | Statistically significant findings    | <ul style="list-style-type: none"> <li>• AUC-glucose: AUC-insulin ratio - a statistically significant change from baseline for AUC-insulin and the ratio with AUC-glucose in the exercise group but not in the control.</li> <li>• AUC-insulin - significantly improved (<math>P &lt; .001</math>) compared to the control group.</li> <li>• <math>VO_2</math> at anaerobic threshold - within and between group statistical changes for <math>VO_2</math> at anaerobic threshold (MD: <math>4.4 \text{ ml/kg/min}^{-1}</math>; <math>P &lt; .001</math>)</li> <li>• Maximum workload - within and between group statistical changes (MD: 32.3 Watts; <math>P &lt; .001</math>)</li> <li>• Ventilatory equivalent for carbon dioxide production - only within group changes</li> </ul> |

|                           |                                    |                                                                                                                                                                                                                                                                                                                                                                                                                                                                                                                                                                                                                                                                                                                                                                                                                                                                                                                                                                      |
|---------------------------|------------------------------------|----------------------------------------------------------------------------------------------------------------------------------------------------------------------------------------------------------------------------------------------------------------------------------------------------------------------------------------------------------------------------------------------------------------------------------------------------------------------------------------------------------------------------------------------------------------------------------------------------------------------------------------------------------------------------------------------------------------------------------------------------------------------------------------------------------------------------------------------------------------------------------------------------------------------------------------------------------------------|
|                           |                                    | <p>were reported (VE/VCO<sub>2</sub>: MD: -0.6; <math>P = .01</math>).</p> <ul style="list-style-type: none"> <li>• Participant leisure time physical activity (METs-hrs/wk) - significantly higher (<math>P &lt; .001</math>) following an exercise intervention.</li> </ul>                                                                                                                                                                                                                                                                                                                                                                                                                                                                                                                                                                                                                                                                                        |
| <b>Vizza et al. [119]</b> | Statistically significant findings | <ul style="list-style-type: none"> <li>• Glycated haemoglobin (HbA1c) - Resistance training statistically reduced (<math>P = .037</math>) within group HbA1c percentage, and when compared with control (<math>P = .03</math>, <math>d = 0.39</math>).</li> <li>• Lower, but not upper, body strength was significantly increased (<math>P = .04</math>) following a resistance training intervention; it was also significantly improved compared to a control (ES: 0.45; <math>P = .03</math>).</li> <li>• Depression, Anxiety and Stress Scale 21 (DASS-21) - the depression domain showed within group (<math>P = 0.050</math>) and between group (ES: 0.50; <math>P = 0.01</math>) reductions following resistance training.</li> <li>• Exercise Self Efficacy Scale - a statistically significant reduction (<math>P = 0.04</math>) of self-efficacy within the control group, but no changes in the exercise groups or differences between groups.</li> </ul> |

HR: heart rate; FMD: flow mediated dilation; HIT: high-intensity interval training; MD: mean difference; DHEA: dehydroepiandrosterone; AUC: area under the curve; VO<sub>2</sub>: volume of oxygen; VE/VCO<sub>2</sub>: minute ventilation/carbon dioxide production; MET: metabolic equivalent of task.

**Supplementary Table 10.** Exercise and Diet versus Control: Summary of findings from investigative outcomes that were only reported in single trials.

| <b>Trial</b>                 | <b>Significance</b>                   | <b>Outcomes</b>                                                                                                                                                                                                                                                                                                                                                                                                        |
|------------------------------|---------------------------------------|------------------------------------------------------------------------------------------------------------------------------------------------------------------------------------------------------------------------------------------------------------------------------------------------------------------------------------------------------------------------------------------------------------------------|
| <b>Guzick et al. [98]</b>    | No statistically significant findings | Fasting insulin; luteinising hormone; follicle stimulating hormone.                                                                                                                                                                                                                                                                                                                                                    |
|                              | Statistically significant findings    | <ul style="list-style-type: none"> <li>• Bodyweight - statistical interaction effect (<math>P &lt; .0001</math>) reflecting an improvement following combined exercise and diet intervention, but not control.</li> <li>• Free testosterone - statistical interaction effect (<math>P = .02</math>) following a combined exercise and diet intervention, but not control.</li> </ul>                                   |
| <b>Hoeger et al. [99]</b>    | No statistically significant findings | Free androgen index; AUC-glucose; AUC-insulin; fasting blood glucose; ovulatory status                                                                                                                                                                                                                                                                                                                                 |
|                              | Statistically significant findings    | <ul style="list-style-type: none"> <li>• Bodyweight - statistically significant (<math>P &lt; .05</math>) within-group bodyweight reductions for lifestyle and placebo, but no statistical differences versus placebo alone.</li> <li>• When lifestyle was combined with Metformin, statistical differences (<math>P &lt; .05</math>) compared to placebo only were reported for body weight, SHBG and FAI.</li> </ul> |
| <b>Petranyi et al. [106]</b> | Statistically significant findings    | <ul style="list-style-type: none"> <li>• Statistically significant (<math>P &lt; .001</math>) reductions in levels of acne, FG scores and BMI following lifestyle and Metformin therapy; changes in the Metformin only arm were comparable apart from BMI-related which was statistically higher in the combined treatment (<math>P = .03</math>).</li> </ul>                                                          |

AUC: area under the curve; SHBG: sex hormone binding globulin; FAI: free androgen index; FG: Ferriman-Gallwey; BMI: body mass index

**Supplementary Table 11.** Effect estimates and heterogeneity for change from baseline to immediately post-intervention, and immediately post-intervention values only, for all outcomes analysed in the comparison Exercise and Diet versus Diet Only.

| Outcome                    | Trials | N  | Change from baseline |        |       |    | I <sup>2</sup> (%) | Trials | N     | Immediately post-intervention |       |    |  | I <sup>2</sup> (%) |
|----------------------------|--------|----|----------------------|--------|-------|----|--------------------|--------|-------|-------------------------------|-------|----|--|--------------------|
|                            |        |    | MD                   | 95% CI |       | MD |                    |        |       | 95% CI                        |       |    |  |                    |
|                            |        |    |                      | Lower  | Upper |    |                    |        |       | Lower                         | Upper |    |  |                    |
| FBG (mg/dL)                | 2      | 78 | 2.92                 | -0.40  | 6.23  | 42 | 2                  | 78     | 2.86  | -1.56                         | 7.29  | 0  |  |                    |
| FI (μIU/mL)                | 3      | 90 | 2.22                 | -3.70  | 8.14  | 62 | 2                  | 64     | -2.72 | -7.70                         | 2.27  | 0  |  |                    |
| HOMA-IR                    | 2      | 78 | -0.01                | -0.45  | 0.43  | 0  | -                  | -      | -     | -                             | -     | -  |  |                    |
| Body Weight (kg)           | 2      | 64 | -0.40                | -3.64  | 2.83  | 0  | 2                  | 64     | 1.49  | -8.05                         | 11.03 | 0  |  |                    |
| BMI (kg/m <sup>2</sup> )   | 2      | 38 | -0.09                | -1.27  | 1.09  | 0  | 2                  | 38     | 2.56  | -1.77                         | 6.88  | 0  |  |                    |
| WC (cm)                    | 2      | 64 | -0.47                | -3.95  | 3.01  | 0  | 2                  | 64     | -1.51 | -8.69                         | 5.67  | 0  |  |                    |
| Body Fat (%)               | 2      | 78 | -1.05                | -4.61  | 2.50  | 85 | 2                  | 78     | -0.93 | -3.63                         | 1.77  | 10 |  |                    |
| FFM (kg) <sup>▲</sup>      | 2      | 78 | 0.40                 | -3.24  | 4.03  | 85 | 2                  | 78     | 2.07  | -1.72                         | 5.86  | 0  |  |                    |
| Testosterone (nmol/L)      | 3      | 90 | 0.29                 | -0.49  | 1.08  | 78 | 3                  | 90     | 0.08  | -0.38                         | 0.54  | 0  |  |                    |
| SHBG (nmol/L) <sup>▲</sup> | 3      | 90 | 2.18                 | -3.15  | 7.51  | 51 | 3                  | 90     | 6.45  | -5.52                         | 18.42 | 61 |  |                    |
| FAI                        | 2      | 64 | 0.11                 | -2.28  | 2.50  | 0  | 2                  | 64     | -2.88 | -6.58                         | 0.81  | 0  |  |                    |

Negative values favour exercise and diet combined except where stated otherwise. <sup>▲</sup>: positive values favour exercise and diet combined over diet only. Trials: number of studies included within analysis, *N*: number of participants included within analysis. Effect estimates are reported as mean differences (MD), and 95% confidence intervals (CI), between exercise and diet combined vs diet only groups. Heterogeneity reported using I<sup>2</sup> statistic. FBG: fasting blood glucose; FI: fasting insulin; HOMA-IR: homeostatic model of assessment, insulin resistance; BMI: body mass index; WC: waist circumference; FFM: fat free mass; SHBG: sex hormone binding globulin; FAI: free androgen index.

**Supplementary Table 12.** Exercise and Diet versus Diet: Summary of findings from investigative outcomes that were only reported in single trials.

| Trial                | Significance                          | Outcomes                                                                                                                                                                                                                                                                                                                                                                                                                                                                                                                                                                                                                                                                                                                                                                                                                                                                                                                                                                                                                                                                                                                                                                                  |
|----------------------|---------------------------------------|-------------------------------------------------------------------------------------------------------------------------------------------------------------------------------------------------------------------------------------------------------------------------------------------------------------------------------------------------------------------------------------------------------------------------------------------------------------------------------------------------------------------------------------------------------------------------------------------------------------------------------------------------------------------------------------------------------------------------------------------------------------------------------------------------------------------------------------------------------------------------------------------------------------------------------------------------------------------------------------------------------------------------------------------------------------------------------------------------------------------------------------------------------------------------------------------|
| Bruner et al. [97]   | No statistically significant findings | Resting energy expenditure; LH/FSH ratio; number of ovarian follicles (left and right)                                                                                                                                                                                                                                                                                                                                                                                                                                                                                                                                                                                                                                                                                                                                                                                                                                                                                                                                                                                                                                                                                                    |
|                      | Statistically significant findings    | <ul style="list-style-type: none"> <li>Sum of two skinfolds (subscapular and iliac crest) - statistically lower than at baseline and a group x time interaction (<math>P = .002</math>) immediately post-intervention with a greater decrease in the exercise and diet group compared with diet only.</li> </ul>                                                                                                                                                                                                                                                                                                                                                                                                                                                                                                                                                                                                                                                                                                                                                                                                                                                                          |
| Nybacka et al. [104] | No statistically significant findings | <ul style="list-style-type: none"> <li>No significant changes seen in any intervention arm for ratio of upper/lower body fat. No effect seen in upper body fat (kg) for diet only or diet and exercise combined; no reduction in lower body fat for the exercise only arm.</li> <li>Exercise and diet combined did not significantly reduce IGF-I or IGFBP-1</li> </ul>                                                                                                                                                                                                                                                                                                                                                                                                                                                                                                                                                                                                                                                                                                                                                                                                                   |
|                      | Statistically significant findings    | <ul style="list-style-type: none"> <li>In the diet only arm statistical changes in free testosterone (<math>-3.66</math> pg/mL, 95% CI: <math>-6.12</math> to <math>-1.20</math>; <math>P &lt; .001</math>), AMH (<math>P &lt; .01</math>), IGF-1 (<math>17.1</math> µg/L, 95% CI: <math>0.3</math> to <math>33.9</math>; <math>P &lt; .05</math>), and IGFBP-1 (<math>0.32</math> µg/L, 95% CI: <math>0.01</math> to <math>0.64</math>; <math>P &lt; .05</math>) were reported that were not present in the combined arm.</li> <li>There were statistically significant reductions in lower body fat for diet only (<math>-1055</math>g, 95% CI: <math>-1787</math> to <math>-322</math>; <math>P &lt; .01</math>) and diet and exercise (<math>1616</math>g, 95% CI: <math>-2407</math> to <math>-825</math>; <math>P &lt; .001</math>), lean body mass in the diet and exercise arm only (<math>-2.66</math>kg, 95% CI: <math>-4.14</math> to <math>-1.18</math>; <math>P &lt; .001</math>), mean ovarian follicle number in both diet only (<math>P &lt; .05</math>) and the combined arm (<math>P &lt; .05</math>), as well as improvements to ovulatory function in both</li> </ul> |

|                            |                                       |                                                                                                                                                                                                                                                                                                                                                                                                                                                                                                                                                                                                                                                                                                                                                                                                                                                                     |
|----------------------------|---------------------------------------|---------------------------------------------------------------------------------------------------------------------------------------------------------------------------------------------------------------------------------------------------------------------------------------------------------------------------------------------------------------------------------------------------------------------------------------------------------------------------------------------------------------------------------------------------------------------------------------------------------------------------------------------------------------------------------------------------------------------------------------------------------------------------------------------------------------------------------------------------------------------|
|                            |                                       | intervention arms (diet: $P < .001$ ; combined: $P < .05$ ).                                                                                                                                                                                                                                                                                                                                                                                                                                                                                                                                                                                                                                                                                                                                                                                                        |
|                            |                                       | <ul style="list-style-type: none"> <li>• Mean ovarian volume was reduced in the diet and exercise arm only (<math>P &lt; .05</math>).</li> </ul>                                                                                                                                                                                                                                                                                                                                                                                                                                                                                                                                                                                                                                                                                                                    |
| <b>Thomson et al. [33]</b> | No statistically significant findings | The Centre of Epidemiologic Studies Depression Scale was also used but there were no differences in post-intervention scores compared to baseline.                                                                                                                                                                                                                                                                                                                                                                                                                                                                                                                                                                                                                                                                                                                  |
|                            | Statistically significant findings    | <ul style="list-style-type: none"> <li>• Statistically significant reductions (<math>P \leq .03</math>) to fat mass and abdominal fat mass in all groups; both exercise arms were also statistically different (<math>P \leq .03</math>) to the diet only arm.</li> <li>• Levels of endothelial function were also measured; vascular cell adhesion molecule-I (<math>P = .01</math>), plasminogen activator inhibitor-I (<math>P &lt; .001</math>) and intra-cellular adhesion molecule-I (<math>P &lt; .001</math>) were reduced in all treatment arms with no statistical differences between treatments.</li> <li>• PCOS-Q was used to assess quality of life; and found statistical improvements (<math>P \leq .001</math>) across all treatment arms in each domain apart from body hair scores. No differences between treatment arms were found.</li> </ul> |

LH/FSH: luteinising hormone/follicle stimulating hormone; IGF-1: insulin-like growth factor-1; IGFBP-1; insulin-like growth factor binding protein-1; AMH: anti-Müllerian hormone; PCOS-Q; polycystic ovary syndrome questionnaire.
