# Supplementary material for: Exercise, or exercise and diet for the management of polycystic ovary syndrome: a systematic review and meta-analysis
Source: Syst Rev. 2019 Feb 12;8:51. doi: 10.1186/s13643-019-0962-3 (PMC6371542; doi:10.1186/s13643-019-0962-3)
Supplement: Supplementary file 2 — Figure S1. Review of authors’ judgements about each risk of bias item for each included study; Figure S2. Forest plot of comparison: exercise vs. control. Analysis of immediately post-intervention values for outcomes related to participant lipid profile; Figure S3. Forest plot of comparison: exercise vs. control. Analysis of resting heart rate subgroups by intervention type; Figure S4. Forest plot of comparison: exercise vs. control, change from baseline; outcome: SF-36 domains; Figure S5. Forest plot of comparison: exercise and diet vs. control; outcome: waist-to-hip ratio; Figure S6. Forest plot of comparison: exercise and diet vs. control, change from baseline. outcome: SHBG. (PDF 345 kb) [file 13643_2019_962_MOESM2_ESM.pdf]

**Supplementary Figure 1.** Review of authors' judgements about each risk of bias item for each included study.

|                      | Random sequence generation (selection bias) | Allocation concealment (selection bias) | Blinding of participants and personnel (performance bias) | Blinding of outcome assessment (detection bias) | Incomplete outcome data (attrition bias) | Selective reporting (reporting bias) | Group similarity at baseline (other bias) | Adherence (other bias) | Contamination (other bias) |
|----------------------|---------------------------------------------|-----------------------------------------|-----------------------------------------------------------|-------------------------------------------------|------------------------------------------|--------------------------------------|-------------------------------------------|------------------------|----------------------------|
| Almenning 2015       | +                                           | +                                       | -                                                         | -                                               | +                                        | +                                    | +                                         | +                      | ?                          |
| Brown 2009           | +                                           | +                                       | -                                                         | -                                               | -                                        | ?                                    | -                                         | +                      | ?                          |
| Bruner 2006          | ?                                           | +                                       | -                                                         | -                                               | -                                        | ?                                    | +                                         | ?                      | ?                          |
| Guzick 1994          | ?                                           | ?                                       | -                                                         | -                                               | +                                        | ?                                    | +                                         | ?                      | ?                          |
| Hoeger 2004          | +                                           | ?                                       | -                                                         | -                                               | -                                        | ?                                    | +                                         | ?                      | ?                          |
| Konopka 2015         | ?                                           | ?                                       | -                                                         | -                                               | -                                        | +                                    | +                                         | ?                      | ?                          |
| Nasrekani 2016       | ?                                           | ?                                       | -                                                         | -                                               | +                                        | ?                                    | +                                         | ?                      | ?                          |
| Nybacka 2011         | +                                           | ?                                       | -                                                         | -                                               | -                                        | ?                                    | +                                         | ?                      | ?                          |
| Petranyi 2011        | ?                                           | ?                                       | -                                                         | -                                               | +                                        | ?                                    | ?                                         | ?                      | ?                          |
| Roessler 2013        | ?                                           | ?                                       | -                                                         | -                                               | +                                        | ?                                    | +                                         | -                      | -                          |
| Sa 2015              | -                                           | -                                       | -                                                         | -                                               | +                                        | -                                    | +                                         | ?                      | -                          |
| Saremi 2013          | ?                                           | ?                                       | -                                                         | -                                               | +                                        | ?                                    | ?                                         | ?                      | ?                          |
| Saremi 2016          | ?                                           | +                                       | -                                                         | -                                               | ?                                        | ?                                    | ?                                         | ?                      | ?                          |
| Stener-Victorin 2009 | +                                           | ?                                       | -                                                         | -                                               | -                                        | +                                    | +                                         | +                      | -                          |
| Thomson 2008         | +                                           | ?                                       | -                                                         | -                                               | -                                        | ?                                    | +                                         | ?                      | ?                          |
| Turan 2015           | +                                           | +                                       | -                                                         | -                                               | +                                        | ?                                    | +                                         | +                      | ?                          |
| Vigorito 2007        | ?                                           | ?                                       | -                                                         | +                                               | +                                        | ?                                    | ?                                         | +                      | +                          |
| Vizza 2016           | +                                           | +                                       | -                                                         | -                                               | -                                        | ?                                    | -                                         | -                      | ?                          |

**Supplementary Figure 2.** Forest plot of comparison: Exercise vs. Control. Analysis of immediately post-intervention values for outcomes related to participant lipid profile.

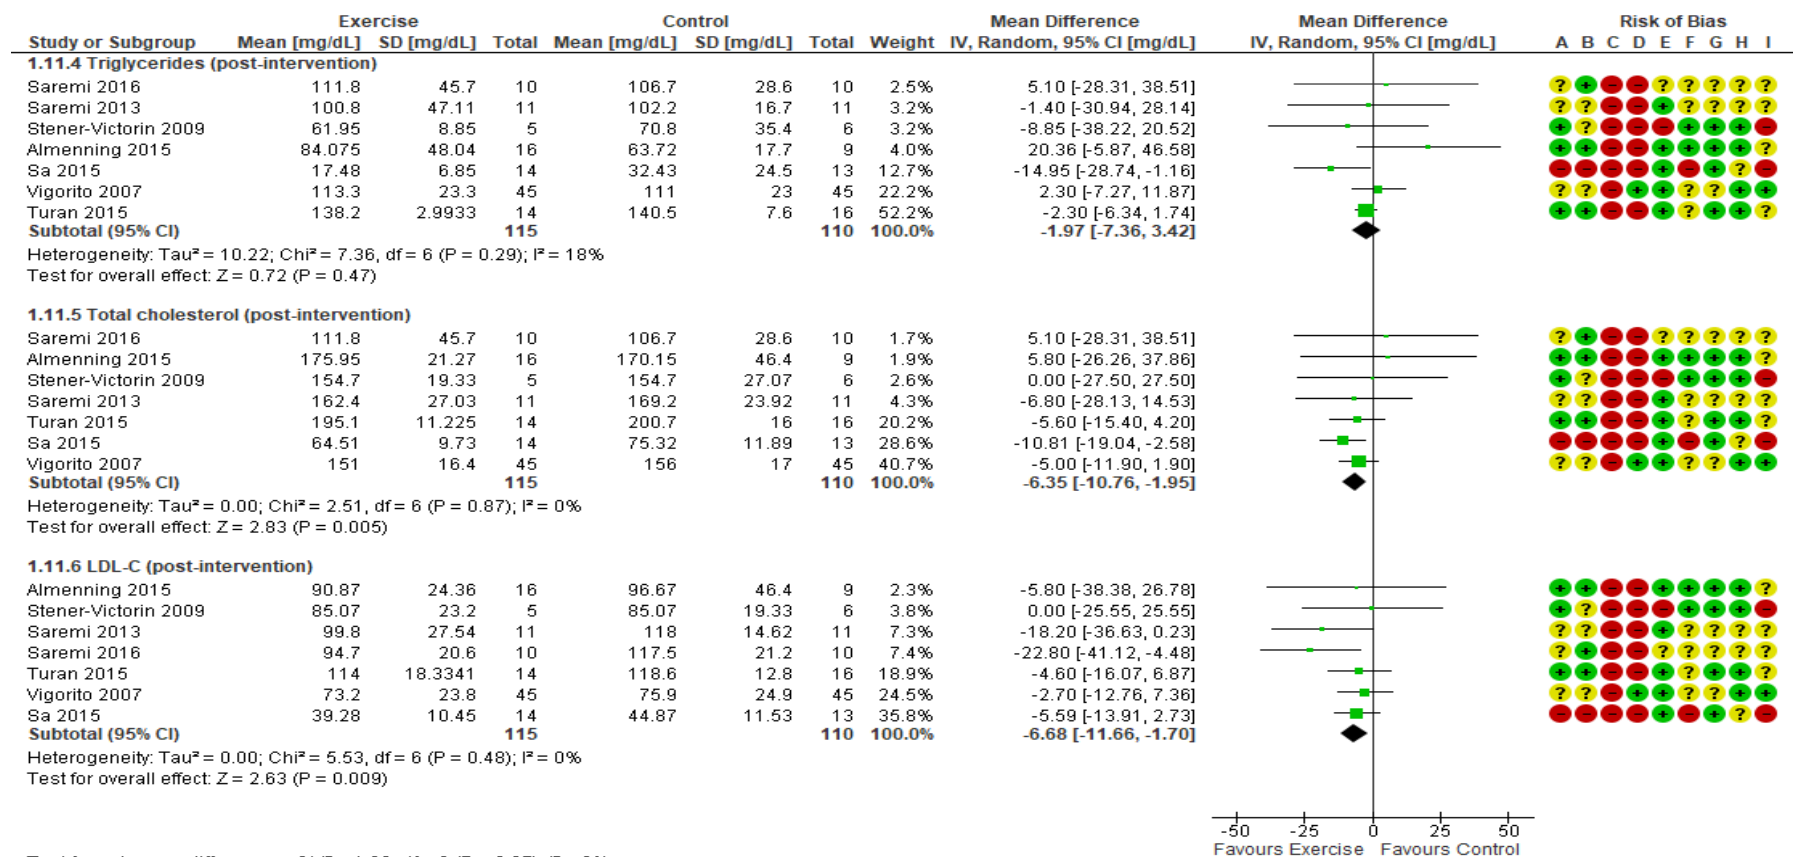

**Supplementary Figure 3** - Forest plot of comparison: Exercise vs. Control. Analysis of resting heart rate sub-groups by intervention type.

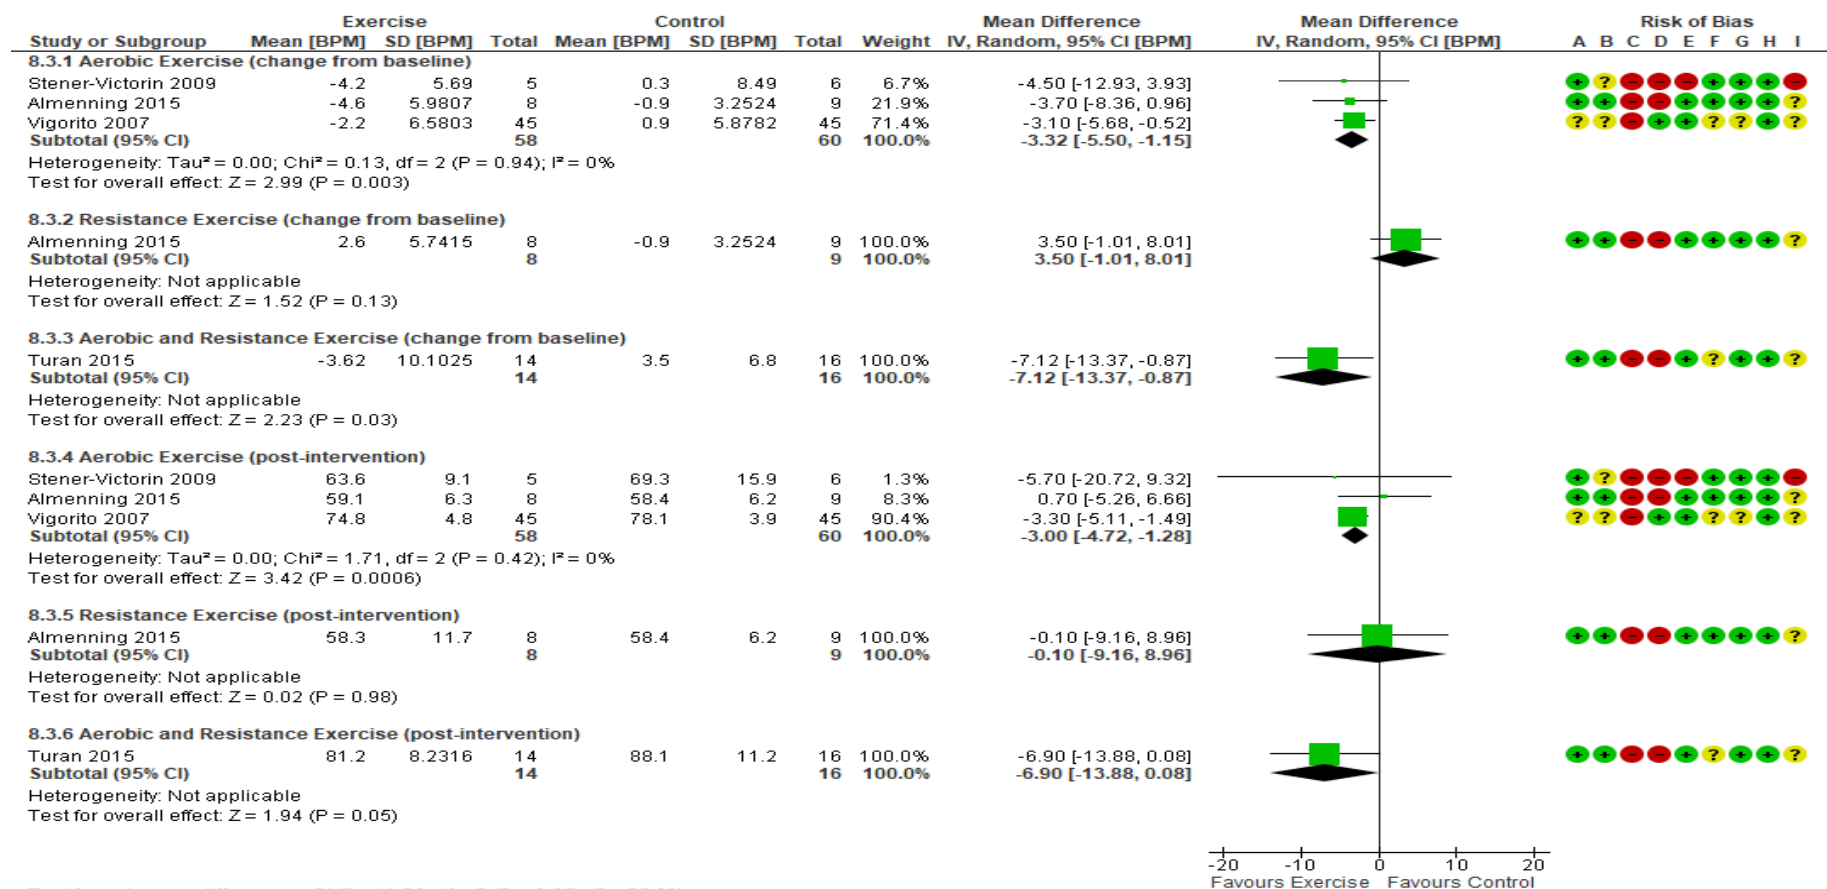

**Supplementary Figure 4.** A: Funnel plot of comparison: Exercise vs. Control, outcome: BMI (change from baseline). B: Funnel plot of comparison: Exercise vs. Control, outcome: BMI (post-intervention).

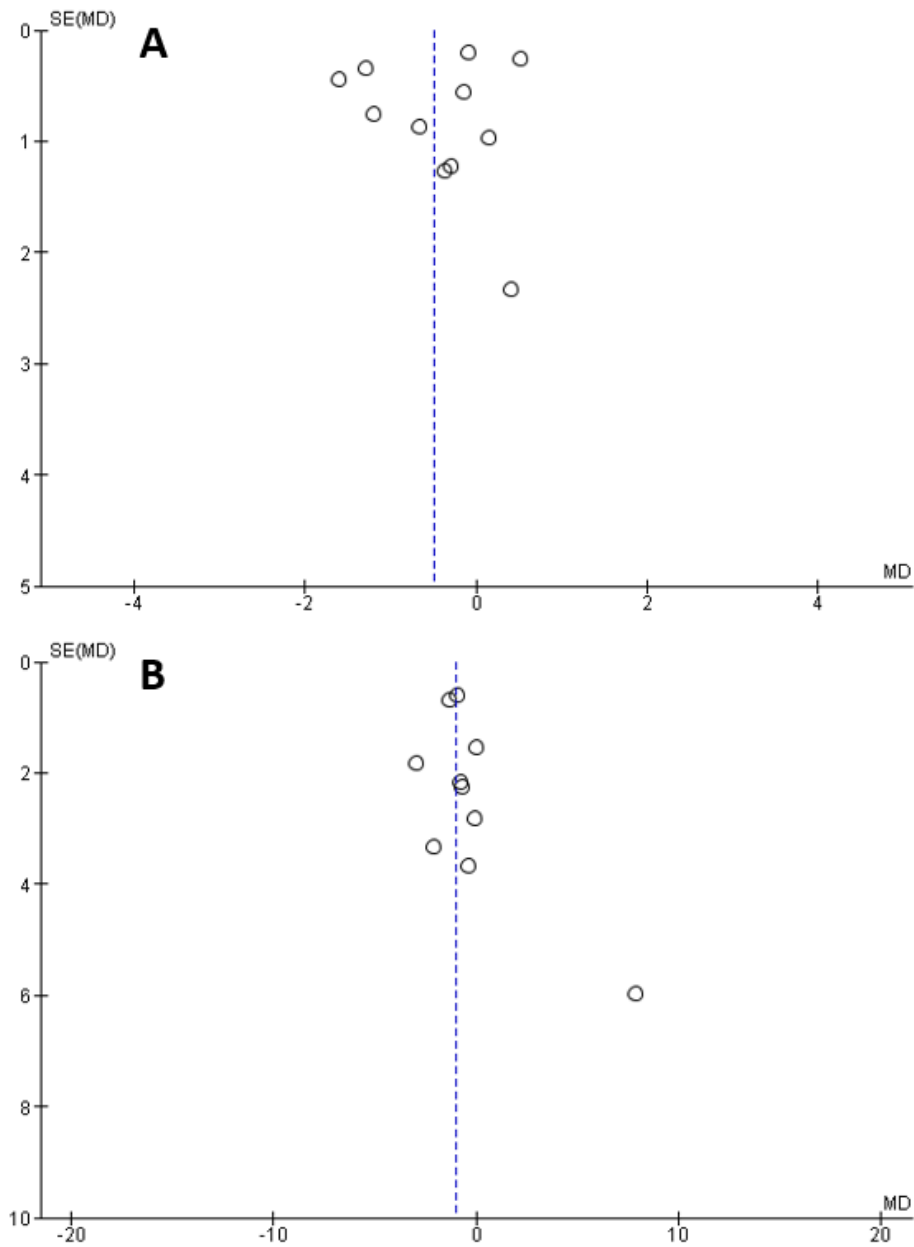

**Supplementary Figure 5.** Forest plot of comparison: Exercise vs. Control, change from baseline; Outcome: SF-36 Domains.

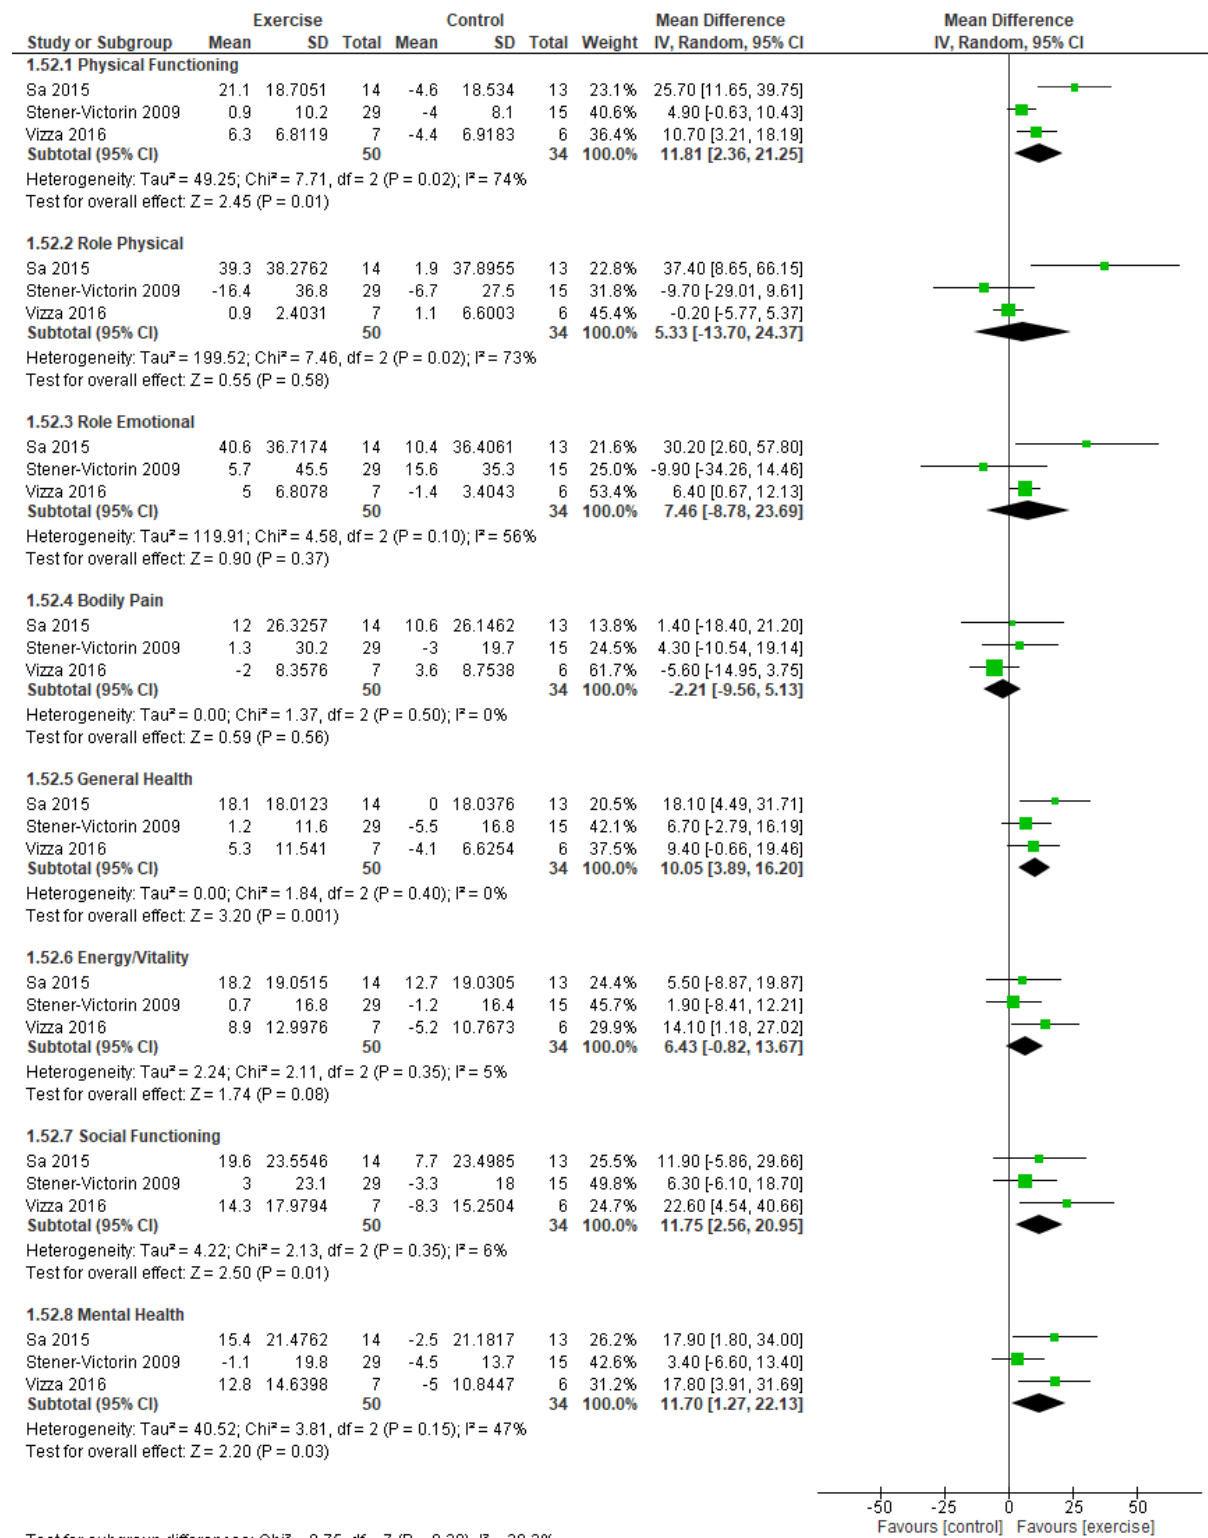

**Supplementary Figure 6.** Forest plot of comparison: Exercise and Diet vs. Control; outcome: Waist to Hip Ratio.

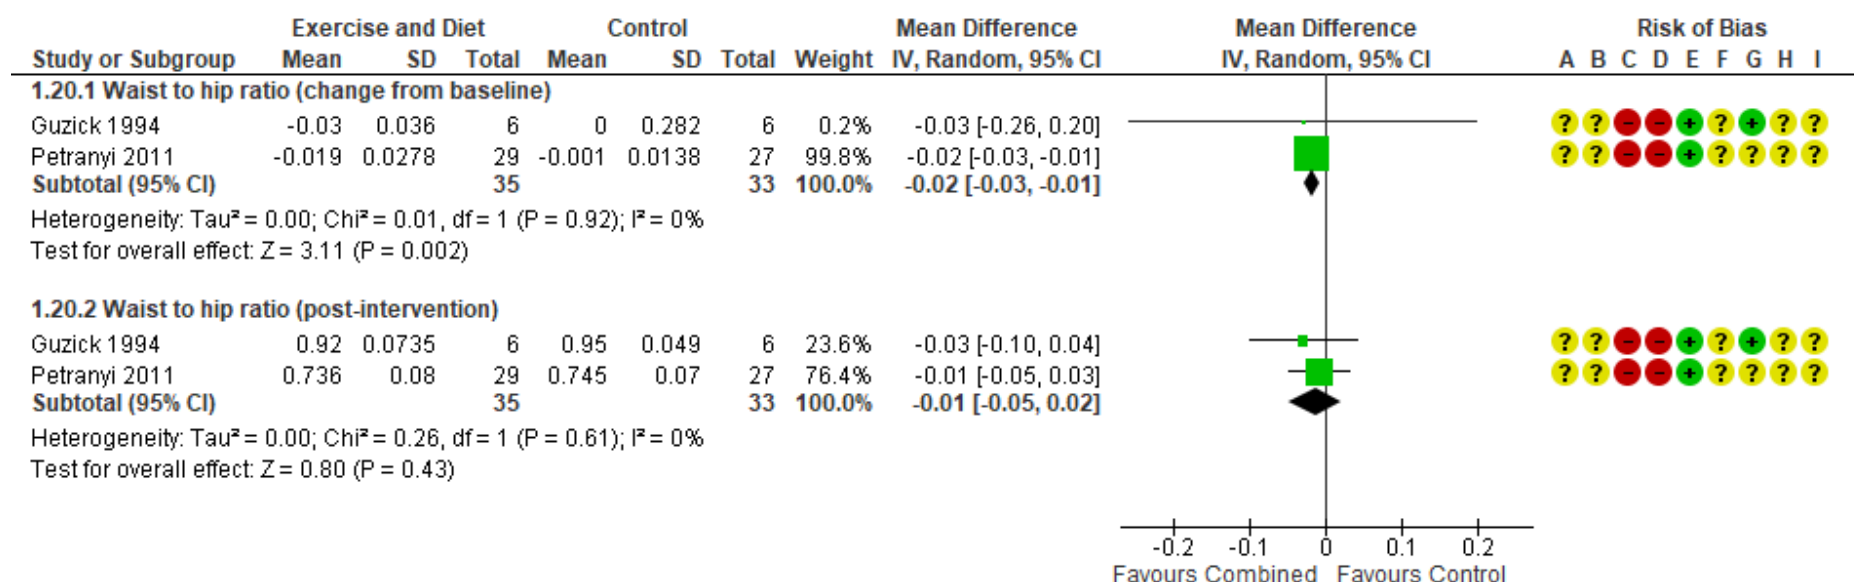

**Supplementary Figure 7.** Forest plot of comparison: Exercise and Diet vs. Control, change from baseline. Outcome: Sex-hormone binding globulin (SHBG).

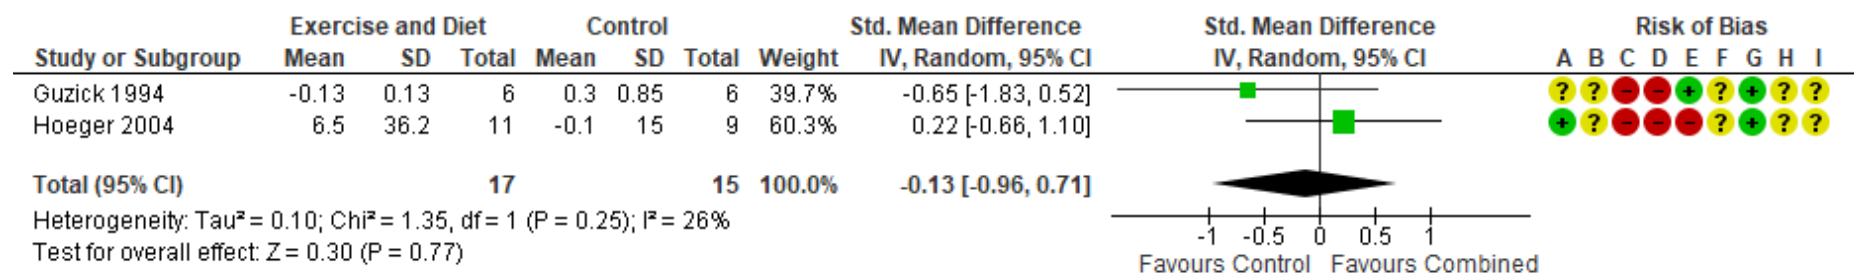

Risk of bias legend

- (A) Random sequence generation (selection bias)
- (B) Allocation concealment (selection bias)
- (C) Blinding of participants and personnel (performance bias)
- (D) Blinding of outcome assessment (detection bias)
- (E) Incomplete outcome data (attrition bias)
- (F) Selective reporting (reporting bias)
- (G) Group similarity at baseline (other bias)
- (H) Adherence (other bias)
- (I) Contamination (other bias)
